# Supplementary material
Source: PubMed Central journal article supplement (PMC2650629)

Table S1. Strains and plasmids

| Strain or Plasmid    | Description                               | Reference                      |
|----------------------|-------------------------------------------|--------------------------------|
| Strain               |                                           |                                |
| Sakai (RIMD 0509952) | Wild type EHEC O157:H7                    | Hayashi <i>et al.</i> , 2001   |
| SKI 1182             | Sakai $\Delta pchA\Delta pchB\Delta pchC$ | Nakanishi <i>et al.</i> , 2006 |
| SKI 0855             | Sakai $\Delta pchA\Delta pchB$            | This study                     |
| SKI 0352             | Sakai $\Delta ler$                        | Nakanishi <i>et al.</i> , 2006 |
| SKI 1282             | Sakai $\Delta pchB\Delta pchC$ pchA-Strep | This study                     |
| SKI 1172             | Sakai <i>ler</i> -FLAG                    | This study                     |
| Plasmid              |                                           |                                |
| pGEM                 | Cloning vector                            | Promega                        |
| pGEM-pchA            | pGEM with pchA                            | This study                     |
| pGEM-ler             | pGEM with ler                             | This study                     |

Table S2. ORFs in clusters L1

| ECs#          | gene/ORF         | product                                                           | locus***      | Bound by**** |
|---------------|------------------|-------------------------------------------------------------------|---------------|--------------|
| ECs0109       | b0105            | hypothetical protein                                              | K12           |              |
| ECs0207       | <i>dniR</i>      | transcriptional regulator for nitrite reductase (cytochrome c552) | K12           | P            |
| ECs0335       |                  | putative oxidoreductase                                           | S-loop57      | P            |
| ECs0354       |                  | putative invertase                                                | S-loop54      | P+L          |
| ECs0355       |                  | putative invertase                                                | S-loop54      | P+L          |
| ECs0356       |                  | hypothetical protein                                              | S-loop54      | P+L          |
| ECs0512       | <i>ylaD</i>      | maltose O-acetyltransferase                                       | K12           | P+L*****     |
| ECs0513       | <i>hha</i>       | haemolysin expression modulating protein                          | K12           | P+L*****     |
| ECs0514       | <i>ybaJ</i>      | hypothetical protein                                              | K12           | P+L          |
| ECs0649       | <i>rnk</i>       | regulator of nucleoside diphosphate kinase                        | K12           |              |
| ECs0814       |                  | putative outer membrane protein                                   | Sp3           | P+L          |
| ECs1126/2715* | <i>espF-M/U</i>  | type III secretion effector EspF-U/TccP                           | Sp4/Sp14      | P+L*****     |
| ECs1812*      | <i>nleA/espI</i> | type III secretion effector NleA/EspI                             | Sp9           | P+L          |
| ECs1820       |                  | hypothetical protein                                              | Sp9           |              |
| ECs2714*      | <i>espJ</i>      | type III secretion effector EspJ                                  | Sp14          | P+L          |
| ECs3500       |                  | hypothetical membrane protein                                     | Sp17          | P            |
| ECs4550*      | <i>espF</i>      | Effector protein EspF                                             | LEE           | L*****       |
| ECs4551       | L0017            | type III secretion system protein                                 | LEE           | L*****       |
| ECs4552       | <i>escF</i>      | type III secretion system EscF protein                            | LEE           | L*****       |
| ECs4553       |                  | type III secretion system chaperone CesD2                         | LEE           | L*****       |
| ECs4554*      | <i>espB</i>      | Translocator protein EspB                                         | LEE           | L*****       |
| ECs4555*      | <i>espD</i>      | Translocator protein EspD                                         | LEE           | L*****       |
| ECs4556*      | <i>espA</i>      | Translocator protein EspA                                         | LEE           | L*****       |
| ECs4557       | <i>sepL</i>      | type III secretion system SepL protein                            | LEE           | L            |
| ECs4558       | <i>escD</i>      | type III secretion system EscD protein                            | LEE           | P+L          |
| ECs4559       | <i>eae</i>       | Gamma intimin                                                     | LEE           | P+L*****     |
| ECs4560       | <i>cesT</i>      | type III secretion system chaperon CesT                           | LEE           | P+L          |
| ECs4562*      | <i>map</i>       | Effector protein Map                                              | LEE           | L            |
| ECs4563       | <i>cesF</i>      | type III secretion system chaperon CesF                           | LEE           | P+L*****     |
| ECs4564*      | <i>espH</i>      | Effector protein EspH                                             | LEE           | P+L*****     |
| ECs4565       | <i>sepQ</i>      | type III secretion system SepQ protein                            | LEE           | P+L*****     |
| ECs4566       | L0032            | hypothetical protein                                              | LEE           | P+L*****     |
| ECs4567       | L0033            | hypothetical protein                                              | LEE           | P+L*****     |
| ECs4568       | <i>escN</i>      | type III secretion system protein EscN                            | LEE           | P+L          |
| ECs4570       | L0036            | hypothetical protein                                              | LEE           | P+L          |
| ECs4571*      | <i>sepZ</i>      | Effector protein SepZ/ EspZ                                       | LEE           | P+L          |
| ECs4572       | L0038            | hypothetical protein                                              | LEE           | P+L*****     |
| ECs4573       | <i>escJ</i>      | type III secretion system EscJ protein                            | LEE           | P+L*****     |
| ECs4574       | <i>sepD</i>      | type III secretion system protein SepD                            | LEE           | P+L*****     |
| ECs4575       | <i>escC</i>      | type III secretion system EscC protein                            | LEE           | P+L*****     |
| ECs4576       |                  | type III secretion system chaperone CesD                          | LEE           | P+L*****     |
| ECs4577       | <i>grlA</i>      | Transcription regulator protein GrlA                              | LEE           | P+L          |
| ECs4578       | <i>grlR</i>      | Transcription regulator protein GrlR                              | LEE           | P+L          |
| ECs4579       | L0045            | hypothetical protein                                              | LEE           | P+L          |
| ECs4580       | <i>escU</i>      | type III secretion system EscU protein                            | LEE           | P+L          |
| ECs4581       | <i>escT</i>      | type III secretion system EscT protein                            | LEE           | P+L          |
| ECs4582       | <i>escS</i>      | type III secretion system EscS protein                            | LEE           | P+L          |
| ECs4583       | <i>escR</i>      | type III secretion system EscR protein                            | LEE           | P+L          |
| ECs4584       | L0050            | hypothetical protein                                              | LEE           | P+L          |
| ECs4585       | L0051            | hypothetical protein                                              | LEE           | P+L          |
| ECs4586       | L0052            | hypothetical protein                                              | LEE           | P+L          |
| ECs4587       | L0053            | hypothetical protein                                              | LEE           | P+L          |
| ECs4590*      | <i>espG</i>      | Effector protein EspG                                             | LEE           | P+L          |
| ECs4958       |                  | hypothetical protein                                              | Sp18          |              |
| PO157_01      | <i>tagA</i>      | TagA protein                                                      | pO157 plasmid |              |

\* gene encoding type III effector or translocator protein

\*\* ECs4588 (ler) was not included because of artificially controlled expression

\*\*\* K12: common to K12

\*\*\*\* P: Pch, L: Ler, P+L: Pch and Ler.

\*\*\*\*\* bound at upstream gene

Table S3. ORFs in cluster L2

| ECs#             | gene/ORF               | product                                                                  | locus**   | bound by*** |
|------------------|------------------------|--------------------------------------------------------------------------|-----------|-------------|
| ECs0119          | <i>aceF</i>            | pyruvate dehydrogenase E2 component (dihydrolipoamide acetyltransferase) | K12       |             |
| ECs0212          |                        | hypothetical protein                                                     | S-loop13  |             |
| ECs0229          |                        | hypothetical protein                                                     | S-loop13  |             |
| ECs0235          |                        | hypothetical protein                                                     | S-loop13  |             |
| ECs0240          |                        | hypothetical membrane protein                                            | S-loop13  | P+L         |
| ECs0241          |                        | H repeat-associated protein                                              | S-loop13  | P+L****     |
| ECs0242          |                        | Rhs core protein                                                         | S-loop13  | P+L****     |
| ECs0243          |                        | hypothetical protein                                                     | S-loop13  | P+L****     |
| ECs0244          |                        | hypothetical protein                                                     | S-loop13  | P+L****     |
| ECs0245          |                        | putative H repeat-associated protein                                     | S-loop13  | L           |
| ECs0268          | <i>phoE</i>            | outer membrane pore protein PhoE                                         | K12       |             |
| ECs0293          |                        | hypothetical protein                                                     | S-loop19  | P+L         |
| ECs0294          |                        | hypothetical protein                                                     | S-loop19  | P+L         |
| ECs0295          |                        | hypothetical protein                                                     | S-loop19  | P+L         |
| ECs0342          | <i>ykgC</i>            | putative oxidoreductase                                                  | K12       |             |
| ECs0360          | <i>betT</i>            | high-affinity choline transport                                          | K12       |             |
| ECs0445          | <i>rdgC</i>            | recombination associated protein                                         | K12       |             |
| ECs0451          | <i>brnQ</i>            | branched chain amino acid transport system II carrier protein            | K12       |             |
| ECs0452          | <i>proY</i>            | proline permease transport protein                                       | K12       |             |
| ECs0454          |                        | hypothetical protein                                                     | K12       |             |
| ECs0511          | <i>ylaC</i>            | hypothetical protein                                                     | K12       |             |
| ECs0703          | b0669                  | putative RNA                                                             | K12       |             |
| ECs0815          |                        | antitermination protein                                                  | Sp3       | P+L         |
| ECs0816          |                        | hypothetical membrane protein                                            | Sp3       | P+L****     |
| ECs0817          |                        | hypothetical protein                                                     | Sp3       |             |
| ECs0846          | <i>nleB2-1'</i>        | NleB-like protein, pseudogene                                            | Sp3       | P           |
| ECs0848*         | <i>nleH1-1</i>         | Effector protein NleH1                                                   | Sp3       | P           |
| ECs0849          |                        | hypothetical protein                                                     | Sp3       | P           |
| ECs0899          | b0822                  | hypothetical protein                                                     | K12       |             |
| ECs0949          |                        | hypothetical protein                                                     | S-loop74  | p           |
| ECs1061          |                        | hypothetical protein                                                     | Sp4       |             |
| ECs1101          |                        | hypothetical protein                                                     | Sp4       |             |
| ECs1147          | <i>yccM</i>            | predicted 4Fe-4S membrane protein                                        | K12       |             |
| ECs1343          |                        | TerW protein                                                             | SpLE1     |             |
| ECs1466          | <i>yceD</i>            | hypothetical protein                                                     | K12       |             |
| ECs1467          | <i>rpmF</i>            | 50S ribosomal protein L32                                                | K12       |             |
| ECs1521          |                        | hypothetical protein                                                     | Sp6       |             |
| ECs1525          |                        | hypothetical protein                                                     | Sp6       |             |
| ECs1526          |                        | hypothetical protein                                                     | Sp6       |             |
| ECs1560*         | <i>espX7</i>           | Effector protein EspX7                                                   | Sp6       | P           |
| ECs1561*         | <i>espN</i>            | Effector protein EspN                                                    | Sp6       | P           |
| ECs1562          |                        | hypothetical protein                                                     | Sp6       | P****       |
| ECs1567*         | <i>espO1-1</i>         | Effector protein EspO1-1                                                 | Sp6       | P           |
| ECs1568*         | <i>espK</i>            | Effector protein EspK                                                    | Sp6       | P           |
| ECs1810          | <i>nleG2-1'</i>        | NleG pseudogene                                                          | Sp9       |             |
| ECs1811          | <i>nleG2-1'</i>        | NleG pseudogene                                                          | Sp9       |             |
| ECs1814*         | <i>nleH1-2</i>         | Effector protein NleH1-2                                                 | Sp9       | P****       |
| ECs1815*         | <i>nleF</i>            | Effector protein NleF                                                    | Sp9       | P           |
| ECs1821          | <i>espO1-2</i>         | Effector protein EspO1-2                                                 | Sp9       | P+L         |
| ECs1822          |                        | hypothetical protein                                                     | Sp9       | P+L         |
| ECs1823          |                        | hypothetical protein                                                     | Sp9       | P+L         |
| ECs1824*         | <i>nleG</i>            | Effector protein NleG                                                    | Sp9       | P+L****     |
| ECs1891          | <i>ycjP</i>            | putative transport system permease protein                               | K12       |             |
| ECs1903          | <i>tpx</i>             | thiol peroxidase                                                         | K12       |             |
| ECs1960          |                        | hypothetical protein                                                     | S-loop14  |             |
| ECs1988          |                        | hypothetical protein                                                     | S-loop14  |             |
| ECs1994/ECs2156* | <i>nleG2-2/nleG2-3</i> | Effector protein NleG2-2/NleG2-3                                         | Sp10/Sp11 | P****       |
| ECs1995/ECs2155* | <i>nleG6-1/nleG6-2</i> | Effector protein NleG6-1/NleG6-2                                         | Sp10/Sp11 | P****       |
| ECs1996/ECs2154* | <i>nleG5-1/nleG5-2</i> | Effector protein NleG5-1/NleG5-2                                         | Sp10/Sp11 | P           |
| ECs2143          |                        | putative transcriptional regulator                                       | K12       |             |
| ECs2228          | <i>nleG3'</i>          | NleG pseudogene                                                          | Sp12      |             |
| ECs2229          | <i>nleG3'</i>          | NleG pseudogene                                                          | Sp12      |             |
| ECs2263          |                        | hypothetical protein                                                     | Sp12      |             |
| ECs2264          |                        | hypothetical protein                                                     | Sp12      |             |
| ECs2365          | <i>sodB</i>            | superoxide dismutase                                                     | K12       |             |
| ECs2403          | <i>ydiP</i>            | predicted DNA-binding transcriptional regulator                          | K12       |             |
| ECs2460          | <i>ynjB</i>            | hypothetical protein                                                     | K12       |             |
| ECs2518          | b1809                  | hypothetical protein                                                     | K12       |             |
| ECs2631          |                        | putative derepression protein                                            | S-loop22  |             |
| ECs2637          |                        | putative transposase OrfA protein of insertion sequence IS629            | S-loop22  |             |
| ECs2701          | <i>yedR</i>            | predicted inner membrane protein                                         | K12       | P+L         |
| ECs2736          |                        | putative terminase small subunit                                         | Sp14      |             |
| ECs2747          |                        | hypothetical protein                                                     | Sp14      |             |
| ECs2748          |                        | hypothetical protein                                                     | Sp14      |             |
| ECs2913          | b2107                  | hypothetical protein                                                     | K12       |             |
| ECs2917          | <i>yehD</i>            | putative fimbrial-like protein                                           | K12       | P+L         |
| ECs3140          | <i>ais</i>             | aluminum-inducible protein                                               | K12       | P           |
| ECs3166          | <i>nuoH</i>            | NADH dehydrogenase I chain H                                             | K12       |             |

|          |                |                                                               |               |     |
|----------|----------------|---------------------------------------------------------------|---------------|-----|
| ECs3232  |                | putative DNA injection protein                                | S-loop28      |     |
| ECs3269  | <i>yfeO</i>    | predicted ion channel protein                                 | K12           |     |
| ECs3291  | <i>yfeK</i>    | hypothetical protein                                          | K12           |     |
| ECs3293  | <i>cysA</i>    | ATP-binding component of sulfate permease A protein; chromate | K12           |     |
| ECs3314  | <i>eutH</i>    | ethanolamine utilization protein EutH                         | K12           |     |
| ECs3319  | <i>cchA</i>    | detox protein                                                 | K12           |     |
| ECs3367  | b2505          | putative outer membrane lipoprotein                           | K12           | L   |
| ECs3486* | <i>nleG8-2</i> | Effector protein NleG8-2                                      | Sp17          | P   |
| ECs3487* | <i>espW</i>    | Effector protein EspW                                         | Sp17          | P   |
| ECs3488  | <i>nleG6-3</i> | Effector protein NleG6-3, pseudogene                          | Sp17          |     |
| ECs3499  |                | hypothetical protein                                          | Sp17          |     |
| ECs3508  |                | hypothetical protein                                          | Sp17          | P   |
| ECs3509  |                | hypothetical protein                                          | Sp17          | P   |
| ECs3510  |                | hypothetical protein                                          | Sp17          | P   |
| ECs3511  |                | hypothetical protein                                          | Sp17          | P   |
| ECs3512  |                | putative site specific recombinase                            | Sp17          | P   |
| ECs3517  | <i>ypjC</i>    | hypothetical protein                                          | K12           | P+L |
| ECs3518  | <i>ygaQ</i>    | hypothetical protein                                          | K12           |     |
| ECs3535  |                | hypothetical protein                                          | S-loop        |     |
| ECs3616  | <i>ybdY</i>    | hypothetical protein                                          | K12           | P+L |
| ECs3703  | <i>yqeH</i>    | hypothetical protein                                          | K12           | P   |
| ECs3713  | b2857          | hypothetical protein                                          | K12           | P   |
| ECs3718  | <i>eprI</i>    | type III secretion protein EprI                               | ETT2          | P   |
| ECs3720  |                | putative transcriptional regulator                            | ETT2          | P   |
| ECs3721  | <i>epaS</i>    | type III secretion protein EprS                               | ETT2          | P   |
| ECs3810  | <i>tktA</i>    | transketolase 1 isozyme                                       | K12           |     |
| ECs3813  |                | hypothetical lipoprotein                                      | S-loop        |     |
| ECs3855* | <i>espL2</i>   | Effector protein EspL2                                        | SpLE3         | P   |
| ECs3857* | <i>nleB1</i>   | Effector protein NleB1                                        | SpLE3         | P   |
| ECs3858* | <i>nleE</i>    | Effector protein NleE                                         | SpLE3         | P   |
| ECs3864  |                | hypothetical protein                                          | SpLE3         |     |
| ECs3886  | <i>yqhA</i>    | hypothetical protein                                          | K12           |     |
| ECs4000  | <i>yhaB</i>    | hypothetical protein                                          | K12           | P   |
| ECs4001  | <i>yhaC</i>    | hypothetical protein                                          | K12           | P   |
| ECs4145  | <i>yrdA</i>    | putative transferase                                          | K12           |     |
| ECs4292  |                | hypothetical membrane protein                                 | S-loop87      | P   |
| ECs4324  |                | hypothetical lipoprotein                                      | S-loop25      |     |
| ECs4359  | <i>yhiH</i>    | putative ATP-binding component of a transport system          | K12           |     |
| ECs4511  | <i>rpmG</i>    | 50S ribosomal protein L33                                     | K12           |     |
| ECs4569  | <i>escV</i>    | type III secretion system EscV protein                        | LEE           | P   |
| ECs4589  |                | hypothetical protein                                          | LEE           | P+L |
| ECs4653* | <i>espY4</i>   | Effector protein EspY4                                        | S-loop39      | P   |
| ECs4656  |                | hypothetical protein                                          | S-loop39      | P   |
| ECs4657  | <i>espY5'</i>  | pseudogene                                                    | S-loop39      | P   |
| ECs4658  |                | hypothetical protein                                          | S-loop39      | P   |
| ECs4871  | <i>katG</i>    | hydroperoxidase HPI(I)                                        | K12           |     |
| ECs4896  | <i>trmA</i>    | tRNA (uracil-5-)-methyltransferase                            | K12           |     |
| ECs4918  | <i>yjaE</i>    | putative transcriptional regulator                            | K12           |     |
| ECs5019  | <i>lamB</i>    | maltose high-affinity receptor LamB                           | K12           |     |
| ECs5095  | <i>basR</i>    | 2-component regulatory system regulatory protein BasR         | K12           |     |
| ECs5233  | <i>yjgM</i>    | predicted acetyltransferase                                   | K12           |     |
| ECs5297  | <i>yjiL</i>    | putative enzyme                                               | K12           |     |
| ECs5314  |                | hypothetical protein                                          | S-loop        | P   |
| PO157_03 | <i>etpC</i>    | type II secretion component                                   | pO157_plasmid |     |
| PO157_04 | <i>etpD</i>    | type II secretion component                                   | pO157_plasmid |     |
| PO157_05 | <i>etpE</i>    | type II secretion component                                   | pO157_plasmid |     |
| PO157_08 | <i>etpH</i>    | type II secretion component                                   | pO157_plasmid |     |
| PO157_11 | <i>etpK</i>    | type II secretion component                                   | pO157_plasmid |     |
| PO157_21 | <i>hlyD</i>    | hemolysin                                                     | pO157_plasmid |     |
| PO157_22 | <i>papX</i>    | hypothetical protein                                          | pO157_plasmid |     |
| PO157_60 | <i>toxB</i>    | ToxB protein                                                  | pO157_plasmid |     |
| PO157_81 |                | hypothetical protein                                          | pO157_plasmid |     |

\* gene encoding type III effector protein (Tobe et al., 2006)

\*\* K12: common to K12

\*\*\* P: Pch, L: Ler, P+L: Pch and Ler.

\*\*\*\* bound at upstream gene



Table S4. ORFs in cluster N

| ECs#    | gene/ORF | product                                        | locus* | bound by** |
|---------|----------|------------------------------------------------|--------|------------|
| ECs0017 | nhaA     | Na <sup>+</sup> /H antiporter                  | K12    |            |
| ECs0018 | nhaR     | transcriptional activator of nhaA              | K12    |            |
| ECs0049 | yabF     | putative NAD(P)H oxidoreductase                | K12    |            |
| ECs0079 | leuL     | leu operon leader peptide                      | K12    | P+L        |
| ECs0088 | ftsI     | septum formation protein FtsI                  | K12    |            |
| ECs0246 | yafV     | putative amidase-type enzyme                   | K12    |            |
| ECs0286 |          | hypothetical protein                           | Sp1    |            |
| ECs0287 |          | putative transcription regulator               | Sp1    |            |
| ECs0324 | ykgK     | putative regulator                             | K12    | L          |
| ECs0383 | yahO     | hypothetical protein                           | K12    |            |
| ECs0439 | yaiA     | hypothetical protein                           | K12    |            |
|         |          | ATP-dependent proteolytic subunit of clpA-     | K12    |            |
| ECs0491 | clpP     | clpP serine protease ClpP                      | K12    |            |
|         |          | ATP-dependent specificity component of clpP    | K12    |            |
| ECs0492 | clpX     | serine protease ClpX                           | K12    |            |
| ECs0538 | ybaS     | putative glutaminase                           | K12    | P          |
| ECs0539 | ybaT     | putative amino acid/amine transport protein    | K12    | P          |
| ECs0621 |          | hypothetical protein                           | K12    |            |
|         |          | transcriptional repressor of nag (N-           | K12    |            |
| ECs0706 | nagC     | acetylglucosamine) operon                      | K12    |            |
| ECs0781 | b0753    | putative homeobox protein                      | K12    |            |
| ECs0864 | ybhL     | hypothetical protein                           | K12    |            |
| ECs0890 | dps      | global regulator protein Dps                   | K12    |            |
| ECs0912 | b0833    | hypothetical protein                           | K12    |            |
| ECs0969 | infA     | translation initiation factor IF-1             | K12    |            |
| ECs1041 | ompA     | outer membrane protein 3a                      | K12    | P          |
| ECs1121 |          | putative host specificity protein              | Sp4    |            |
| ECs1155 | cbpA     | curved DNA-binding protein                     | K12    |            |
| ECs1159 | yecJ     | hypothetical protein                           | K12    |            |
| ECs1160 |          | putative integrase                             | Sp5    |            |
| ECs1204 |          | hypothetical protein                           | Sp5    |            |
| ECs1243 |          | hypothetical protein                           | Sp5    |            |
| ECs1263 | part     | putative cytochrome                            | K12    |            |
| ECs1272 |          | Rtn-like protein                               | S-loop | P          |
| ECs1384 |          | hypothetical protein                           | S-loop |            |
|         |          | curli production assembly/transport component  | K12    |            |
| ECs1414 | csgG     | CsgG                                           | K12    |            |
| ECs1429 | msyB     | acidic protein MsyB                            | K12    |            |
| ECs1506 |          | putative phage repressor                       | Sp6    |            |
| ECs1510 |          | putative replication protein                   | Sp6    |            |
| ECs1556 |          | putative regulatory protein                    | Sp6    |            |
| ECs1566 |          | hypothetical protein                           | Sp6    |            |
| ECs1662 |          | hypothetical protein                           | Sp8    |            |
| ECs1672 | yegK     | hypothetical protein                           | K12    |            |
| ECs1765 |          | putative regulatory protein                    | Sp9    |            |
| ECs1813 |          | integrase                                      | Sp9    |            |
| ECs1829 | yciE     | hypothetical protein                           | K12    |            |
| ECs1830 | yciF     | putative structural proteins                   | K12    |            |
| ECs1831 | yciG     | hypothetical protein                           | K12    |            |
| ECs1912 | b1330    | hypothetical protein                           | K12    |            |
| ECs2032 | rimL     | ribosomal-protein-serine N-acetyltransferase   | K12    |            |
| ECs2084 | rpsV     | 30S ribosomal protein S22                      | K12    |            |
| ECs2086 | osmC     | osmotically inducible protein                  | K12    |            |
| ECs2097 | xasA     | acid sensitivity protein                       | K12    |            |
| ECs2281 |          | hypothetical protein                           | K12    |            |
| ECs2291 | ynfC     | hypothetical protein                           | K12    |            |
| ECs2320 | ydgA     | hypothetical protein                           | K12    |            |
|         |          | NAD-dependent 7 $\alpha$ -hydroxysteroid       | K12    |            |
| ECs2327 | hdhA     | dehydrogenase                                  | K12    |            |
| ECs2333 | blr      | beta-lactam resistance protein                 | K12    |            |
|         |          | putative proton-dependent oligopeptide         | K12    |            |
| ECs2343 | ydgR     | transporter                                    | K12    |            |
| ECs2370 | cfa      | cyclopropane fatty acyl phospholipid synthase  | K12    |            |
| ECs2382 | b1675    | hypothetical protein                           | K12    |            |
| ECs2412 | ydiE     | hypothetical protein                           | K12    |            |
| ECs2414 | b1701    | hypothetical protein                           | K12    |            |
| ECs2432 | b1726    | hypothetical protein                           | K12    |            |
| ECs2464 | b1758    | putative cytochrome oxidase                    | K12    |            |
| ECs2493 | yeaH     | hypothetical protein                           | K12    |            |
| ECs2504 | yeaQ     | hypothetical protein                           | K12    |            |
| ECs2546 | b1836    | hypothetical protein                           | K12    |            |
| ECs2547 | b1837    | hypothetical protein                           | K12    |            |
| ECs2548 | pphA     | phosphoprotein phosphatase 1                   | K12    |            |
| ECs2557 | yebF     | hypothetical protein                           | K12    |            |
| ECs2579 | yecN     | hypothetical protein                           | K12    |            |
| ECs2603 | yecG     | putative regulator                             | K12    | P          |
| ECs2620 |          | putative transcriptional regulator             | Sp13   |            |
| ECs2653 | uvrY     | putative 2-component transcriptional regulator | K12    |            |
| ECs2691 | drsB     | hypothetical protein                           | K12    |            |
| ECs2692 | b1953    | hypothetical protein                           | K12    |            |
| ECs2695 | b1957    | hypothetical protein                           | K12    |            |
| ECs2706 | yedV     | putative 2-component sensor protein            | K12    |            |
| ECs2712 | yodB     | putative cytochrome                            | K12    | P          |

|          |       |                                                |               |     |
|----------|-------|------------------------------------------------|---------------|-----|
| ECs2846  | galF  | putative GalF transferase                      | K12           | P   |
| ECs2888  | b2080 | hypothetical protein                           | K12           |     |
| ECs2909  |       | hypothetical protein                           | S-loop        |     |
| ECs2910  |       | putative outer membrane protein                | S-loop        |     |
| ECs2938  | yehV  | putative transcriptional regulator             | K12           |     |
| ECs2974  | stx1A | Shiga toxin I subunit A precursor              | Sp15          | P   |
| ECs3104  | ompC  | outer membrane protein C OmpC                  | K12           | P+L |
| ECs3154  | elaB  | hypothetical protein                           | K12           |     |
| ECs3248  | evgA  | putative positive transcription regulator      | K12           |     |
| ECs3249  | evgS  | putative sensor for regulator EvgA             | K12           |     |
| ECs3271  | b2392 | high affinity manganese transport protein      | K12           | P+L |
| ECs3272  | nupC  | permease of transport system for 3 nucleosides | K12           | P+L |
| ECs3284  | zipA  | cell division protein involved in FtsZ ring    | K12           | P   |
| ECs3289  | crr   | glucose-specific PTS system IIA component      | K12           | P   |
| ECs3394  | iscA  | putative iron-binding protein                  | K12           |     |
| ECs3466  | b2603 | hypothetical protein                           | K12           |     |
| ECs3527  | b2666 | hypothetical protein                           | K12           |     |
| ECs3530  | stpA  | DNA-binding protein                            | K12           |     |
| ECs3533  | ygaM  | hypothetical protein                           | K12           |     |
| ECs3553  | csrA  | carbon storage regulator                       | K12           |     |
| ECs3595  | rpoS  | sigma factor RpoS                              | K12           |     |
| ECs3652  | b2792 | hypothetical protein                           | K12           |     |
| ECs3690  | b2833 | hypothetical protein                           | K12           |     |
| ECs3764  | recJ  | ssDNA exonuclease RecJ                         | K12           |     |
| ECs3795  | yggB  | mechanosensitive channel protein               | K12           |     |
| ECs3818  | metK  | methionine adenosyltransferase 1               | K12           |     |
| ECs3920  | icc   | regulator of lacZ                              | K12           |     |
| ECs3931  | glgS  | glycogen biosynthesis protein GlgS             | K12           |     |
| ECs3979  | yqjC  | hypothetical protein                           | K12           |     |
| ECs3980  | yqjD  | hypothetical protein                           | K12           |     |
| ECs3981  | yqjE  | hypothetical protein                           | K12           |     |
| ECs4045  | pnp   | polynucleotide phosphorylase                   | K12           | P   |
| ECs4112  | yhcO  | hypothetical protein                           | K12           | L   |
| ECs4226  | trpS  | tryptophan tRNA synthetase                     | K12           |     |
| ECs4250  | feoA  | ferrous iron transport protein A               | K12           |     |
| ECs4294  | yhhA  | hypothetical protein                           | K12           |     |
| ECs4363  | yhiM  | hypothetical protein                           | K12           |     |
| ECs4377  | slp   | outer membrane protein Slp                     | K12           | P+L |
| ECs4379  |       | hypothetical protein                           | S-loop        | P+L |
| ECs4380  |       | heme utilization/transport protein             | S-loop        | P+L |
| ECs4389  | hdeB  | hypothetical protein                           | K12           | P+L |
| ECs4390  | hdeA  | hypothetical protein                           | K12           | P+L |
| ECs4391  | hdeD  | hypothetical protein                           | K12           | P+L |
| ECs4392  | yhiE  | hypothetical protein                           | K12           | P+L |
| ECs4393  | yhiU  | putative membrane protein                      | K12           | P+L |
| ECs4395  | gadW  | putative ARAC-type regulatory protein          | K12           | P+L |
| ECs4396  | gadX  | putative ARAC-type regulatory protein          | K12           | P+L |
| ECs4418  | yhjU  | hypothetical protein                           | K12           |     |
| ECs4427  |       | putative fimbrial protein precursor            | S-loop        | L   |
| ECs4433  | yhjY  | putative lipase                                | K12           |     |
| ECs4485  | cysE  | serine acetyltransferase                       | K12           |     |
| ECs4496  | htuL  | involved in lipopolysaccharide biosynthesis    | K12           |     |
| ECs4710  | yifN  | hypothetical protein                           | K12           |     |
| ECs4715  | rhoL  | rho operon leader peptide                      | K12           |     |
| ECs4716  | rho   | transcription termination factor Rho           | K12           |     |
| ECs4848  | yiiT  | putative regulator                             | K12           |     |
| ECs4926  | hydH  | sensor kinase HydH                             | K12           |     |
| ECs4943  |       | putative regulatory protein                    | S-loop        |     |
| ECs5006  | yjbD  | hypothetical protein                           | K12           |     |
| ECs5028  | yjbJ  | hypothetical protein                           | K12           |     |
| ECs5039  | yjbR  | hypothetical protein                           | K12           |     |
| ECs5108  | yjdI  | hypothetical protein                           | K12           |     |
| ECs5109  | yjdJ  | hypothetical protein                           | K12           |     |
| ECs5163  | aidB  | putative acyl coenzyme A dehydrogenase         | K12           |     |
| ECs5195  | ytkK  | hypothetical protein                           | K12           |     |
| ECs5250  |       | hypothetical protein                           | SpLE5         |     |
| ECs5253  |       | putative integrase                             | SpLE6         |     |
| ECs5328  | yjjZ  | hypothetical protein                           | K12           |     |
| PO157_26 |       |                                                | pO157 plasmid |     |

\* K12: common to K12

\*\* P: Pch, L: Ler, P+L: Pch and Ler.

Table S5. PchA binding site on chromosome

| region                                 | genes/ORFs       |              | Ler/Pch effect on transcription |
|----------------------------------------|------------------|--------------|---------------------------------|
| 1 Intergenic between ECs0016 and 0017  | gef, nhaA        | K-12         | negative for nhaA               |
| 2 ECs0023-0025                         | ECs0023-0025     | S-loop       |                                 |
| 3 Upstream of ECs0035                  | carA             | K-12         |                                 |
| 4 Intergenic between ECs0079 and 0080  | leuL-leuO        | K-12         | negative for leuL               |
| 5 Upstream of ECs0085                  | yabB             | K-12         |                                 |
| 6 Intergenic between ECs0116 and 0117  | aroP, pdhR       | K-12         |                                 |
| 7 Upstream of ECs0207                  | dniR             | K-12         | positive for dniR               |
| 8 ECs0212-0216                         | ECs0212-0216     | S-loop       |                                 |
| 9 Intergenic between ECs0233 and 0234  | ECs0233, 0234    | S-loop       | positive for ECs0235            |
| 10 ECs0237-0245                        | rhlI operon      | rhlI/S-loop1 | positive for ECs0240-0245       |
| 11 ECs0287                             | ECs0287          | S-loop       | negative for ECs0286 and 0287   |
| 12 ECs0291-0295                        | ECs0291-0295     | S-loop       | positive for ECs0293-0295       |
| 13 ECs0304                             | ECs0304          | S-loop       |                                 |
| 14 Upstream of ECs0324                 | ykgK             | K-12         | negative for ECs0324            |
| 15 Intergenic between ECs0333 and 0334 |                  | S-loop       |                                 |
| 16 ECs0354-0356                        | ECs0354-0356     | S-loop       | positive for ECs0354-0356       |
| 17 Upstream of ECs0374                 | ECs0374          | S-loop       |                                 |
| 18 ECs0380                             | yahL             | K-12         |                                 |
| 19 Upstream of ECs0432                 | yaiB             | K-12         |                                 |
| 20 ECs0454                             | ECs0454          | K-12         | positive for ECs0454            |
| 21 ECs0472                             | ECs0472          | K-12         |                                 |
| 22 Upstream of ECs0486                 | cyoA             | K-12         |                                 |
| 23 Upstream of ECs0514                 | ybaJ, hha        | K-12         | positive for ybaJ, hha          |
| 24 ECs0548 and ECs0549                 | ECs0548, ECs0549 | S-loop       |                                 |
| 25 ECs0561                             | ybbD             | K-12         |                                 |
| 26 ECs0593                             | sfmC             | K-12         |                                 |
| 27 ECs0602                             | ECs0602          | S-loop       |                                 |
| 28 ECs5380 and ECs0603                 | ECs5380, ECs0603 | K-12         |                                 |
| 29 ECs0657 and 0658                    | citA, citC       | K-12         |                                 |
| 30 Upstream of ECs0660                 | deuC             | K-12         |                                 |
| 31 ECs0662                             | cspE             | K-12         |                                 |
| 32 Upstream of ECs0666                 | lipA             | K-12         |                                 |
| 33 ECs0686                             | ybeU             | K-12         |                                 |
| 34 Upstream of ECs0721                 | speF             | K-12         |                                 |
| 35 Upstream of ECs0728                 | ybfA             | K-12         |                                 |
| 36 Upstream of ECs0731                 | yhhI             | K-12         |                                 |
| 37 ECs0744                             | ybgD             | K-12         |                                 |
| 38 Upstream of ECs0755                 | ECs0755          | S-loop       |                                 |
| 39 ECs0764 and 0765                    | ECs0764, 0765    | S-loop       |                                 |
| 40 Intergenic between ECs0767 and 0768 |                  | S-loop       |                                 |
| 41 ECs0796                             | ybhD             | K-12         |                                 |
| 42 Intergenic between ECs0814 and 0815 |                  | S-loop12     | positive for ECs0814, 0815      |
| 43 ECs0816                             | ECs0816          | S-loop12     | positive for ECs0816            |
| 44 ECs0844                             | ECs0844          | S-loop12     |                                 |
| 45 ECs0846 and 0847                    | nleC             | S-loop12     | positive for ECs0846            |
| 46 Upstream of ECs0848 and 0849        | nleH1-1          | S-loop12     | positive for ECs0848 and 0849   |
| 47 Downstream of ECs0851               | ybhB             | K-12         |                                 |
| 48 ECs0865                             | ybhM             | K-12         | negative for ECs0864            |
| 49 ECs0876                             | espX2            | S-loop       |                                 |
| 50 Intergenic between ECs0891 and 0892 | ybiF, ompX       | K-12         | negative for ECs0890            |
| 51 ECs0912                             | b0833            | K-12         | negative for b0833              |
| 52 ECs0940                             | ECs0940          | S-loop       |                                 |
| 53 ECs0949 and 0950                    | ECs0949, 0950    | S-loop       | positive for ECs0949            |
| 54 Upstream of ECs0987                 | focA             | K-12         |                                 |
| 55 ECs1012                             | ompF             | K-12         |                                 |
| 56 ECs1077                             | ECs1077          | S-loop       |                                 |
| 57 ECs1085                             | ECs1085          | S-loop       |                                 |
| 58 ECs1123                             | ECs1123          | S-loop       |                                 |
| 59 Intergenic between ECs1125 and 1126 |                  | S-loop       | positive for ECs1126            |
| 60 Upstream of ECs1143                 | ECs1143          | S-loop       |                                 |

|                                         |                  |        |                            |
|-----------------------------------------|------------------|--------|----------------------------|
| 61 ECs1157                              | yceE             | K-12   |                            |
| 62 ECs1183                              | ECs1183          | S-loop |                            |
| 63 ECs1228                              | ECs1228          | S-loop |                            |
| 64 Intergenic between ECs1262 and 1263  |                  | S-loop | negative for ECs1263       |
| 65 ECs1268                              | ycdQ             | K-12   |                            |
| 66 ECs1270-1274                         | ECs1270-1274     | S-loop | negative for ECs1272       |
| 67 ECs1280-1281                         | ECs1280-1281     | S-loop |                            |
| 68 ECs1300                              | ECs1300          | S-loop |                            |
| 69 ECs1302 and 1303                     | ECs1302, 1303    | S-loop |                            |
| 70 ECs1316 and 1317                     | ECs1316, 1317    | S-loop |                            |
| 71 ECs1332 and ECs1333                  | ECs1332, 1333    | S-loop |                            |
| 72 ECs1351                              | ECs1351          | S-loop |                            |
| 73 Upstream of ECs1360 and 1361         | iha              | S-loop | negative for iha           |
| 74 ECs1362                              | ECs1362          | S-loop |                            |
| 75 ECs1370                              | ECs1370          | S-loop |                            |
| 76 ECs1373-1375                         | ECs1373-1375     | S-loop |                            |
| 77 Intergenic between ECs1379 and 1380  |                  | S-loop |                            |
| 78 ECs1384 and 1385                     | ECs1384, 1385    | S-loop | negative for ECs1384       |
| 79 Upstream of ECs1391                  | ECs1391          | S-loop |                            |
| 80 ECs1418 and 1419                     | csgB             | K-12   |                            |
| 81 ECs1435-1436                         | b1057, yceO      | K-12   |                            |
| 82 Upstream of ECs1438                  | yceP             | K-12   |                            |
| 83 ECs1560 and 1561                     | espX7, espN      | S-loop | positive for ECs1560, 1561 |
| 84 ECs1567 and 1568                     | espO1-1, espR1   | S-loop | positive for ECs1567, 1568 |
| 85 ECs1611                              | ECs1611          | S-loop |                            |
| 86 ECs1615                              | ECs1615          | S-loop |                            |
| 87 ECs1656                              | ECs1656          | S-loop |                            |
| 88 ECs1662 and 1663                     | ECs1662, 1663    | S-loop | negative for ECs1662       |
| 89 ECs5422                              | ECs5422          | K-12   |                            |
| 90 ECs1722                              | chaB             | K-12   |                            |
| 91 Upstream of ECs1729                  | narG             | K-12   |                            |
| 92 Upstream of ECs1743                  | oppA             | K-12   |                            |
| 93 ECs1772                              | ECs1772          | S-loop |                            |
| 94 ECs1812                              | nleA             | S-loop | positive for ECs1812       |
| 95 Upstream of ECs1815                  | nleF             | S-loop | positive for ECs1815       |
| 96 ECs1821-1823                         | spO1-2           | S-loop | positive for ECs1821-1823  |
| 97 Intergenic between ECs1825 and 1826  |                  | S-loop | positive for ECs1824       |
| 98 Upstream of ECs1909                  | b1327            | K-12   |                            |
| 99 ECs1910-1913                         | ECs1910-1913     | K-12   | negative for ECs1912       |
| 100 ECs1915                             | fnr              | K-12   |                            |
| 101 ECs1941 and 1942                    | ECs1941, 1942    | S-loop |                            |
| 102 ECs1953-1955                        | ECs1953-1955     | S-loop |                            |
| 103 ECs1992                             | ECs1992          | S-loop |                            |
| 104 Intergenic between ECs1996 and 1997 |                  | S-loop | positive for ECs1994-1996  |
| 105 Upstream of ECs2006                 | ECs2006          | S-loop |                            |
| 106 ECs2016-2018                        | ECs2016-2018     | S-loop |                            |
| 107 Upstream of ECs2055                 | b1451            | K-12   |                            |
| 108 ECs5441                             | ECs5441          | K-12   |                            |
| 109 ECs5442                             | ECs5442          | K-12   |                            |
| 110 ECs2073-2076                        | ECs2073-2076     | K-12   |                            |
| 111 ECs2095                             | b1490            | K-12   |                            |
| 112 ECs2098                             | gadB             | K-12   | negative for ECs2097       |
| 113 ECs2101                             | yddA             | K-12   |                            |
| 114 ECs2104 and 2105                    | b1499, b1500     | K-12   |                            |
| 115 ECs2107                             | b1502            | K-12   |                            |
| 116 ECs2111                             |                  | S-loop |                            |
| 117 Upstream of ECs2113                 | ECs2113          | S-loop |                            |
| 118 Upstream of ECs2128                 | uxaB             | K-12   |                            |
| 119 ECs214-2146                         | ydeH, ydel, ydeJ | K-12   |                            |
| 120 ECs2158                             | ECs2158          | S-loop |                            |
| 121 Upstream of ECs2309                 | pntA             | K-12   |                            |
| 122 ECs2343                             | ydgR             | K-12   | negative for ydgR          |

|     |                                     |                      |              |                                              |
|-----|-------------------------------------|----------------------|--------------|----------------------------------------------|
| 123 | ECs2351                             | slyA                 | K-12         |                                              |
| 124 | ECs2364                             | ydhO                 | K-12         | positive for ECs2365                         |
| 125 | ECs2403                             | b1696                | K-12         | positive for b1696                           |
| 126 | ECs2410                             | ydiA                 | K-12         |                                              |
| 127 | ECs2427                             | ECs2427              | K-12         |                                              |
| 128 | ECs2436                             | b1730                | K-12         |                                              |
| 129 | Intergenic between ECs2454 and 2455 | cstC, xthA           | K-12         |                                              |
| 130 | ECs2494 and 2495                    | yeaI, yeaJ           | K-12         |                                              |
| 131 | Upstream of ECs2534                 | b1824                | K-12         |                                              |
| 132 | ECs2583                             | yecK                 | K-12         |                                              |
| 133 | Intergenic between ECs2602 and 2603 | flhD, yecG           | K-12         | negative for yecG                            |
| 134 | ECs2610                             | yecI                 | K-12         |                                              |
| 135 | Upstream of ECs2612                 | b1904                | K-12         |                                              |
| 136 | ECs2620 and 2621                    | ECs2620, 2621        | S-loop       | negative for ECs2620, positive for ECs2621   |
| 137 | ECs2672                             | yedM'                | K-12         |                                              |
| 138 | ECs2674                             | yedM                 | K-12         |                                              |
| 139 | ECs2689                             | fliR                 | K-12         |                                              |
| 140 | Upstream of ECs2701                 | b1963                | K-12         | positive for ECs2701                         |
| 141 | ECs2714                             | espJ                 | S-loop       | positive for ECs2714, 2715                   |
| 142 | ECs2717                             |                      | S-loop       |                                              |
| 143 | ECs2780                             | b1983                | K-12         |                                              |
| 144 | Upstream of ECs2792                 |                      | S-loop       |                                              |
| 145 | Upstream of ECs2819                 | hisL, hisG           | K-12         |                                              |
| 146 | ECs2829                             | ugd                  | K-12         |                                              |
| 147 | ECs2830-2832                        | ECs2830-2832         | S-loop       |                                              |
| 148 | ECs2834                             | ECs2834              | S-loop       |                                              |
| 149 | ECs2836                             | ECs2836              | S-loop       |                                              |
| 150 | ECs2838                             | ECs2838              | S-loop       |                                              |
| 151 | ECs2840-2845                        | ECs2840-2845         | S-loop       |                                              |
| 152 | ECs2859                             | wcaF                 | K-12         |                                              |
| 153 | Upstream of ECs2909                 | ECs2909              | S-loop       | negative for ECs2909                         |
| 154 | Upstream of ECs2917                 | yehD                 | K-12         | positive for yehD                            |
| 155 | ECs2974                             | sltA                 | S-loop       | negative for ECs2974                         |
| 156 | ECs2995                             | ECs2995              | S-loop       |                                              |
| 157 | ECs3104                             | ompC                 | K-12         | negative for ompC                            |
| 158 | ECs3116                             | yfaL                 | K-12         |                                              |
| 159 | ECs3122 and 3123                    | ECs3122, 3123        | S-loop       |                                              |
| 160 | ECs3140 and 3141                    | ais, b2253           | K-12         | positive for ais                             |
| 161 | ECs3157 and 3158                    | elaD, yfbL           | K-12         |                                              |
| 162 | Upstream of ECs3172                 | nuoA                 | K-12         |                                              |
| 163 | Upstream of ECs3174                 | b2290                | K-12         |                                              |
| 164 | Upstream of ECs3222                 | b2339                | K-12         |                                              |
| 165 | ECs3228                             | b2345                | K-12         |                                              |
| 166 | ECs3232                             | ECs3232              | S-loop       | positive for ECs3232                         |
| 167 | ECs3238                             | ECs3238              | S-loop       |                                              |
| 168 | ECs3243                             | ECs3243              | S-loop       |                                              |
| 169 | ECs3247 and 3248                    | emrK, evgA           | K-12         | negative for evgA                            |
| 170 | Intergenic between ECs3284 and 3285 | zipA, cysZ           | K-12         | negative for zipA                            |
| 171 | Upstream of ECs3333                 | yffB                 | K-12         |                                              |
| 172 | ECs3485-3487                        | espM2, nleG8-2, espW | S-loop       | positive for nleG8-2, espW                   |
| 173 | ECs3500                             | ECs3500              | S-loop       | positive for ECs3499, 3500                   |
| 174 | ECs3504                             | ECs3504              | S-loop       |                                              |
| 175 | ECs3507-3512                        | ECs3507-3512         | S-loop       | positive for ECs3508-3512                    |
| 176 | ECs3517                             | b2650                | K-12         | positive for b2650                           |
| 177 | ECs3518 and 3519                    | b2654, b2657         | K-12         |                                              |
| 178 | Intergenic between ECs3530 and 3531 | stpA, b2670          | K-12         | negative for stpA                            |
| 179 | Intergenic between ECs3632 and 3633 |                      | K-12         |                                              |
| 180 | Ecs3639                             | eno                  | K-12         |                                              |
| 181 | Upstream of ECs3656                 | sdaA                 | K-12         |                                              |
| 182 | Intergenic between ECs3660 and 3661 | fucA, fucP           | K-12         |                                              |
| 183 | Intergenic between ECs3687 and 3688 | ygdP, mutH           | K-12         |                                              |
| 184 | ECs3703-3736                        | ETT2                 | K-12, S-loop | positive for ECs3703, 3713, 3718, 3720, 3721 |

|     |                                     |                           |              |                                 |
|-----|-------------------------------------|---------------------------|--------------|---------------------------------|
| 185 | ECs3742                             | ygeV                      | K-12         |                                 |
| 186 | ECs3750                             | ygfJ                      | K-12         |                                 |
| 187 | ECs3854 and 3855                    | espL2                     | S-loop       | positive for espL2              |
| 188 | ECs3856                             | ECs3856                   | S-loop       |                                 |
| 189 | ECs3857 and 3858                    | nleB1, nleE               | S-loop       | positive for nleB1 and nleE     |
| 190 | ECs3859-3861                        | ECs3859-3861              | S-loop       |                                 |
| 191 | Upstream of ECs3872                 | pitB'                     | K-12         |                                 |
| 192 | ECs3888                             | b3004                     | K-12         |                                 |
| 193 | Upstream of ECs3890                 | exbB                      | K-12         |                                 |
| 194 | ECs3955                             | ygiG                      | K-12         |                                 |
| 195 | ECs3999-3401                        | tdcR, yhaB, yhaC          | K-12         | positive for yhaB, yhaC         |
| 196 | ECs4006                             | yhaG                      | K-12         |                                 |
| 197 | Upstream of ECs4051                 | yhbC                      | K-12         |                                 |
| 198 | Upstream of ECs4066                 | ispB                      | K-12         |                                 |
| 199 | Intergenic between ECs4099 and 4100 | nanR, yhcL                | K-12         |                                 |
| 200 | Upstream of ECs4102                 | sspA                      | K-12         |                                 |
| 201 | Upstream of ECs4111                 | yheN                      | K-12         |                                 |
| 202 | ECs4136 and 4137                    | envR, acrE                | K-12         |                                 |
| 203 | Intergenic between ECs4244 and 4245 | yhgE, pckA                | K-12         |                                 |
| 204 | Upstream of ECs4260                 | malT                      | K-12         |                                 |
| 205 | ECs4274                             | glgA                      | K-12         |                                 |
| 206 | ECs4291 and 4292                    | ECs4291 and 4292          | S-loop       |                                 |
| 207 | ECs4361 and 4362                    | yhiJ, yhiK                | K-12         |                                 |
| 208 | ECs4376 and 4377                    | yhiS, slp                 | K-12         | negative for slp                |
| 209 | Upstream of ECs4392                 | gadE                      | K-12         | negative for gadE               |
| 210 | ECs4395 and 4396                    | gadW, gadX                | K-12         | negative for gadX, gadW         |
| 211 | ECs4400 and 4401                    | yhjB, yhjC                | K-12         |                                 |
| 212 | Upstream of ECs4424                 | dppA                      | K-12         |                                 |
| 213 | Upstream of ECs4431                 | ECs4431                   | S-loop       |                                 |
| 214 | Downstream of ECs4441               | cspA                      | K-12         |                                 |
| 215 | ECs4446                             | yiaB                      | K-12         |                                 |
| 216 | ECs4449                             | xylF                      | K-12         |                                 |
| 217 | ECs4466                             | yiaY                      | K-12         |                                 |
| 218 | ECs4471                             | yibG                      | K-12         |                                 |
| 219 | ECs4478-4480                        | yibL                      | K-12, S-loop |                                 |
| 220 | ECs4496 and 4497                    | htrL, rfaD                | K-12         | negative for htrL               |
| 221 | ECs4500-4504                        | ECs4500-4504              | S-loop       |                                 |
| 222 | Intergenic between ECs4507 and 4508 | kdtA                      | K-12         |                                 |
| 223 | Intergenic between ECs4529 and 4530 | gltS, yicE                | K-12         |                                 |
| 224 | ECs4530                             | escD                      | LEE          | positive                        |
| 225 | ECs4560                             | tir                       | LEE          | positive                        |
| 226 | ECs4563-4567                        | espH, sepQ                | LEE          | positive                        |
| 227 | ECs4569-4591                        | LEE3, LEE2, LEE1 oper LEE |              | positive                        |
| 228 | ECs4607-4610                        | ECs4607-4610              | S-loop       |                                 |
| 229 | ECs4643                             | espY4                     | S-loop       |                                 |
| 230 | ECs4653-4659                        | ECs4653-4659              | S-loop       | positive for ECs4653, 4656-4658 |
| 231 | Upstream of ECs4670                 | ECs4670                   | S-loop       |                                 |
| 232 | Upstream of ECs4681                 | atpI                      | K-12         |                                 |
| 233 | ECs4746                             | corA                      | K-12         |                                 |
| 234 | ECs4785                             | yihG                      | K-12         |                                 |
| 235 | Intergenic between ECs4792 and 4793 | glnA, yihK                | K-12         |                                 |
| 236 | Upstream of ECs4812                 | ECs4812                   | S-loop       |                                 |
| 237 | Intergenic between ECs4852 and 4853 | glpF, yiiU                | K-12         |                                 |
| 238 | ECs4996                             | ECs4996                   | S-loop       |                                 |
| 239 | Upstream of ECs5009                 | yjbE                      | K-12         |                                 |
| 240 | ECs5021                             | yjbI                      | K-12         |                                 |
| 241 | ECs5024                             | plsB                      | K-12         |                                 |
| 242 | ECs5030                             | yjbL                      | K-12         |                                 |
| 243 | ECs5037                             | aphA                      | K-12         |                                 |
| 244 | ECs5048                             | yjcF                      | K-12         |                                 |
| 245 | Upstream of ECs5099                 | adiA                      | K-12         |                                 |
| 246 | ECs5115                             | cadC                      | K-12         |                                 |

|                                         |                  |        |                      |
|-----------------------------------------|------------------|--------|----------------------|
| 247 Upstream of ECs5168                 | yjfR             | K-12   |                      |
| 248 Intergenic between ECs5180 and 5181 | yjfZ             | K-12   |                      |
| 249 ECs5230                             | ECs5230          | K-12   |                      |
| 250 ECs5234                             | yjgN             | K-12   | positive for ECs5233 |
| 251 ECs5256-5259                        | ECs5256-5259     | S-loop |                      |
| 252 ECs5265                             | ECs5265          | S-loop |                      |
| 253 ECs5271 and 5272                    | fimB, fimE       | K-12   |                      |
| 254 ECs5284                             | yjiC             | K-12   |                      |
| 255 ECs5295                             | ECs5295          | S-loop |                      |
| 256 ECs5309 and 5310                    | ECs5309 and 5310 | S-loop |                      |
| 257 ECs5314                             | ECs5314          | S-loop | positive for ECs5314 |
| 258 ECs5315                             | tsr              | K-12   |                      |
| 259 Intergenic between ECs5324 and 5325 | yjiP, yjiQ       | K-12   |                      |

---

Table S6. Ler binding site on chromosome

| region                                    | genes/ORFs                        |          | Ler/Pch effect on transcription  |
|-------------------------------------------|-----------------------------------|----------|----------------------------------|
| 1 ECs0079-0081                            | leuL, leuO, ilvI                  | K-12     | negative for leuL                |
| 2 ECs0116-0117                            | aroP-pdhR                         | K-12     |                                  |
| 3 ECs0240                                 | rhlI operon                       | S-loop   | positive for ECs0240-0245        |
| 4 ECs0293-0295                            | ECs0293-0295                      | S-loop   | positive for ECs0293-0295        |
| 5 Intergenic between ECs0324 and ECs0325  | ykgC, ykgD                        | K-12     | negative for ECs0324             |
| 6 ECs0354-0356                            | ECs0354-0356                      | S-loop   | positive for ECs0355             |
| 7 Upstream of ECs0514                     | hha                               | K-12     | positive for ECs0514             |
| 8 Upstream of ECs0755                     | ECs0755                           | S-loop   |                                  |
| 9 Intergenic between ECs0767 and ECs0768  |                                   | S-loop   |                                  |
| 10 ECs0814                                | ECs0814                           | S-loop   | positive for ECs0814 and ECs0815 |
| 11 Upstream of ECs0987                    | focA                              | K-12     |                                  |
| 12 Intergenic between ECs1020 and ECs1021 | ssuE, locus 5 fimbriae operon     | locus 5  |                                  |
| 13 Upstream of ECs1143                    | ymcD                              | K12      |                                  |
| 14 Upstream of ECs1360 and 1361           | iha                               | S-loop   |                                  |
| 15 ECs1362                                | ECs1362                           | S-loop   |                                  |
| 16 Upstream of ECs1386                    | ECs1386                           | S-loop   |                                  |
| 17 ECs5422                                |                                   | K-12     |                                  |
| 18 Upstream of ECs1812                    | nleA                              | Sp9      | positive for ECs1812             |
| 19 ECs1821-1823                           | espO1-2                           | Sp9      | positive for ECs1821, 1822, 1823 |
| 20 Intergenic between ECs1825 and 1826    | espM1                             | Sp9      |                                  |
| 21 ECs2076                                | nmpC                              | K-12     |                                  |
| 22 Upstream of ECs2128                    | uxaB                              | K-12     |                                  |
| 23 ECs2422-2424                           | pheM, rplT, rpmI                  | K-12     |                                  |
| 24 Upstream of ECs2534                    | b1824                             | K-12     |                                  |
| 25 Intergenic between ECs2701 and 2702    | yedR                              | K-12     | positive for ECs2701             |
| 26 ECs2714                                | espJ                              | Sp14     | positive for ECs2714, 2715       |
| 27 ECs2840-2845                           | ECs2840-2845                      | S-loop   |                                  |
| 28 Upstream of ECs2917 and ECs918         | locus 8 fimbriae operon           | locus 8  | positive for ECs2917             |
| 29 ECs3104                                | ompC                              | K-12     | negative for ECs3014             |
| 30 Upstream of ECs3222                    | locus 10 fimbriae operon          | locus 10 |                                  |
| 31 ECs3271                                | mntH                              | K-12     | negative for ECs3271             |
| 32 ECs3333                                | yffB                              | K-12     |                                  |
| 33 ECs3366 - 3367                         | b2504-b2505                       | K-12     | positive for ECs3367             |
| 34 Upstream of ECs3384                    |                                   | S-loop   |                                  |
| 35 Intergenic between ECs3517 and 3518    | tRNA-Ile                          | K-12     | positive for ECs3517, 3518       |
| 36 Upstream of ECs3616                    | ECs3616                           | S-loop   | positive for ECs3616             |
| 37 Intergenic between ECs3632 and ECs3633 | ygcE, ygcF                        | K-12     |                                  |
| 38 Upstream of ECs3652                    | csrB                              | K-12     | negative for ECs3652             |
| 39 Upstream of ECs3872                    | pitB'                             | K-12     |                                  |
| 40 ECs3985-3986                           | yhaH, yhaI                        | K-12     |                                  |
| 41 Intergenic between ECs4099 and 4100    | nanR, yhcR                        | K-12     |                                  |
| 42 Upstream of ECs4111                    | yhcN                              | K-12     |                                  |
| 43 ECs4377-ECs4398                        | gadW, gadB                        | K-12     | 4394, 4395                       |
| 44 ECs4430-4432                           | locus 12 lpf operon               | locus 12 |                                  |
| 45 Downstream of ECs4441                  | cspA                              | K-12     |                                  |
| 46 ECs4466                                | yiaY                              | K-12     |                                  |
| 47 ECs4472                                | ECs4472                           | K-12     |                                  |
| 48 ECs4478-4480                           | yibL                              | S-loop   |                                  |
| 49 ECs4557-4564                           | espH                              | LEE      | positive                         |
| 50 Intergenic between ECs4570 and 4571    | LEE3, LEE2 operon                 | LEE      | positive                         |
| 51 Upstream of ECs4573                    | escJ                              | LEE      | positive                         |
| 52 Upstream of ECs4577 to 4579            | grlA, grlR                        | LEE      | positive                         |
| 53 ECs4583-4591                           | escU, escT, escS, escR, ler, espG | LEE      | positive                         |
| 54 ECs4601 and 4602                       | yicO, yicP                        | K-12     |                                  |
| 55 ECs4822                                | yjjG                              | K-12     |                                  |
| 56 Upstream of ECs4904                    | secE                              | K-12     |                                  |
| 57 Upstream of ECs4908                    | rplJ                              | K-12     |                                  |
| 58 ECs5091                                | yjdA                              | K-12     |                                  |
| 59 Intergenic between ECs5324 and 5325    | fhuF                              | K-12     |                                  |



Figure S1. Binding of Ler on EHEC O157 Sakai chromosome. Vertical bars indicate the relative hybridization intensity of the precipitated DNA compared with DNA in the supernatant. Upper column shows G+C contents in gray vertical lines.

Figure S2. Binding of PchA on EHEC O157 Sakai chromosome. Vertical bars indicate the relative hybridization intensity of the precipitated DNA compared with DNA in the supernatant. Red and blue Arrowheads indicate S-loops (O157:H7 strain-specific regions) and backbone (regions conserved with *E. coli* K12) genes, respectively. Upper column shows G+C contents in gray vertical lines.

Fig. S1

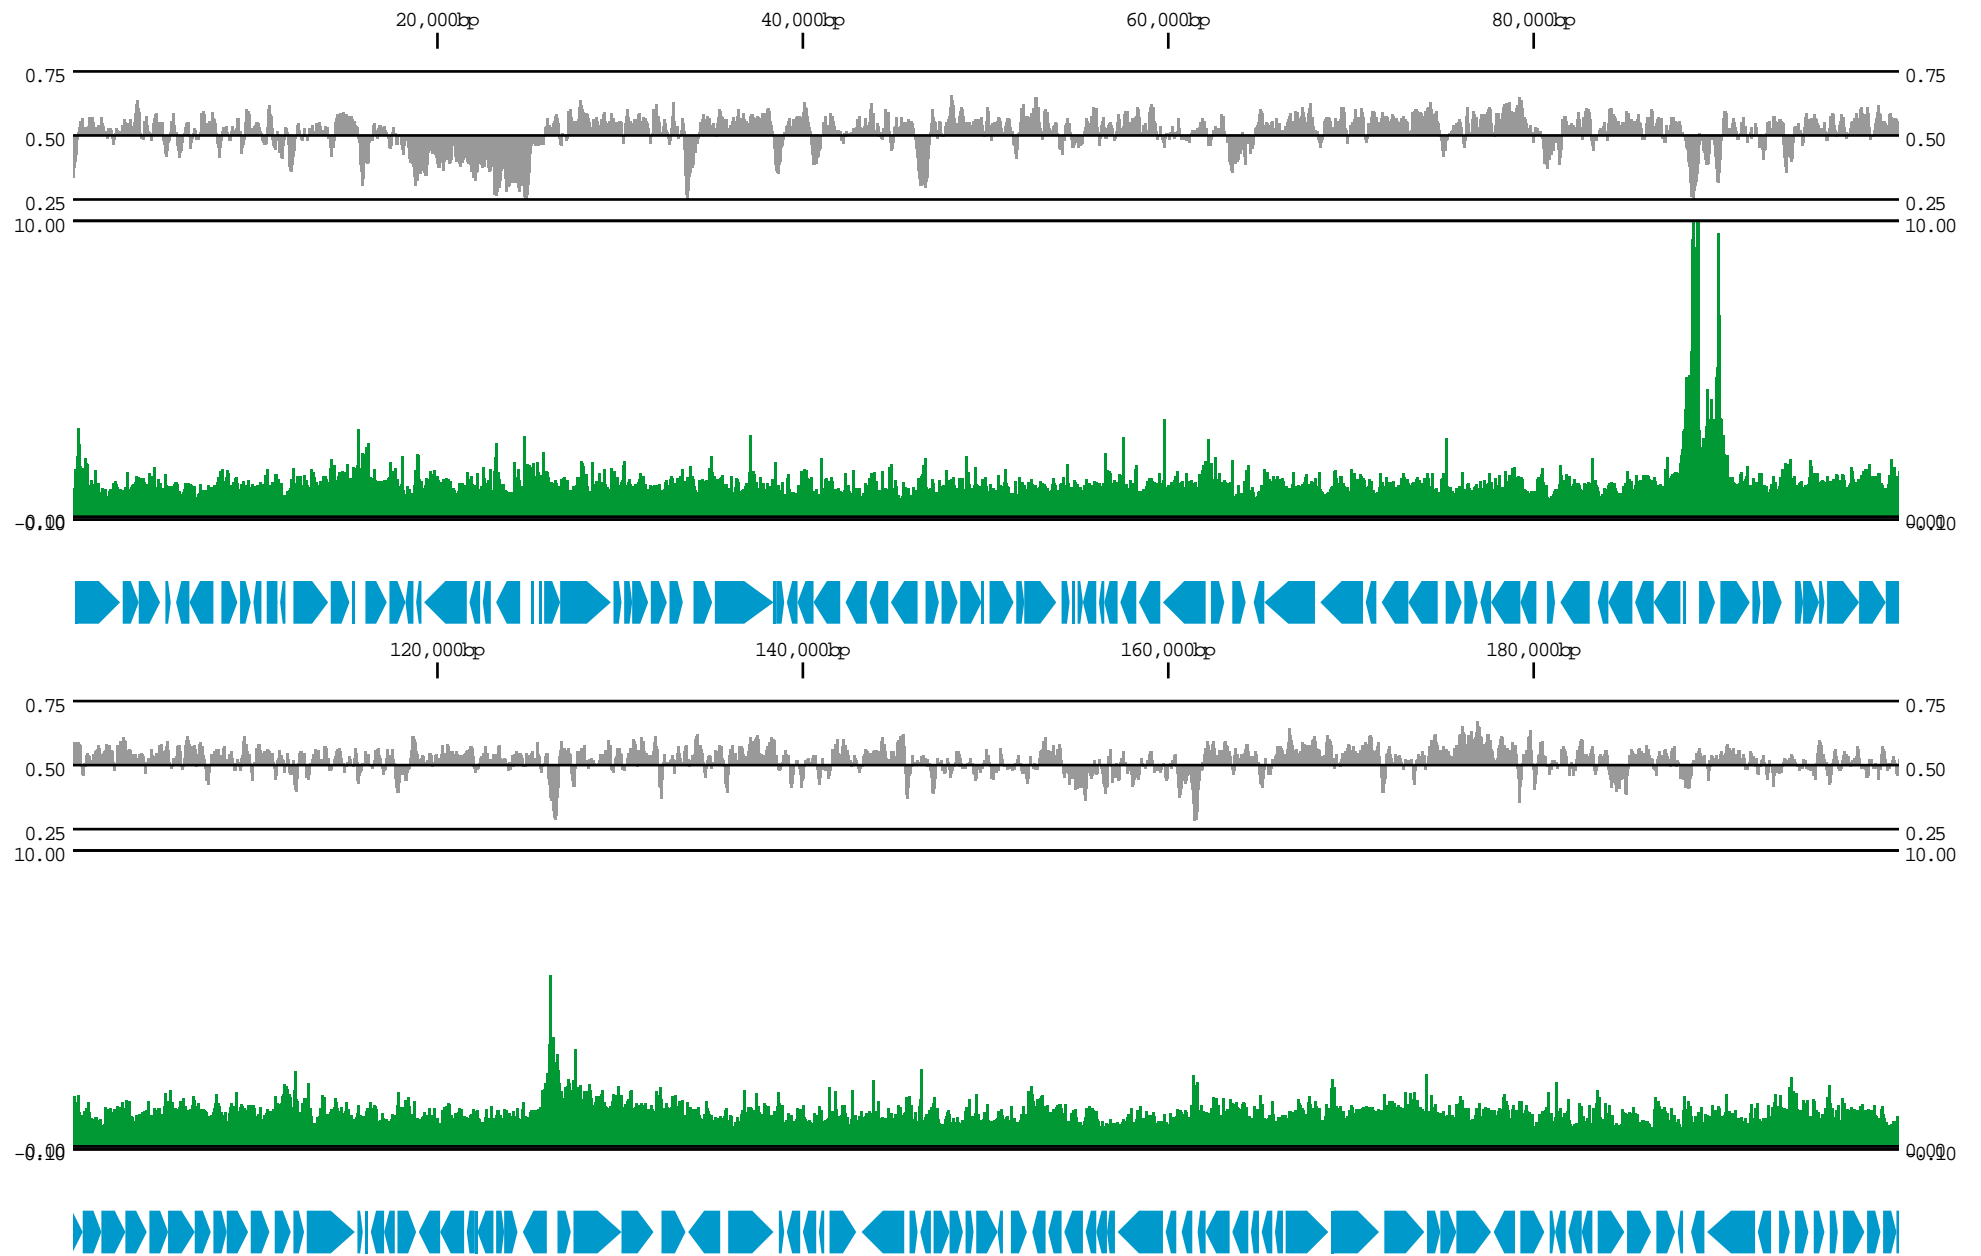

Fig. S1 (cont.)

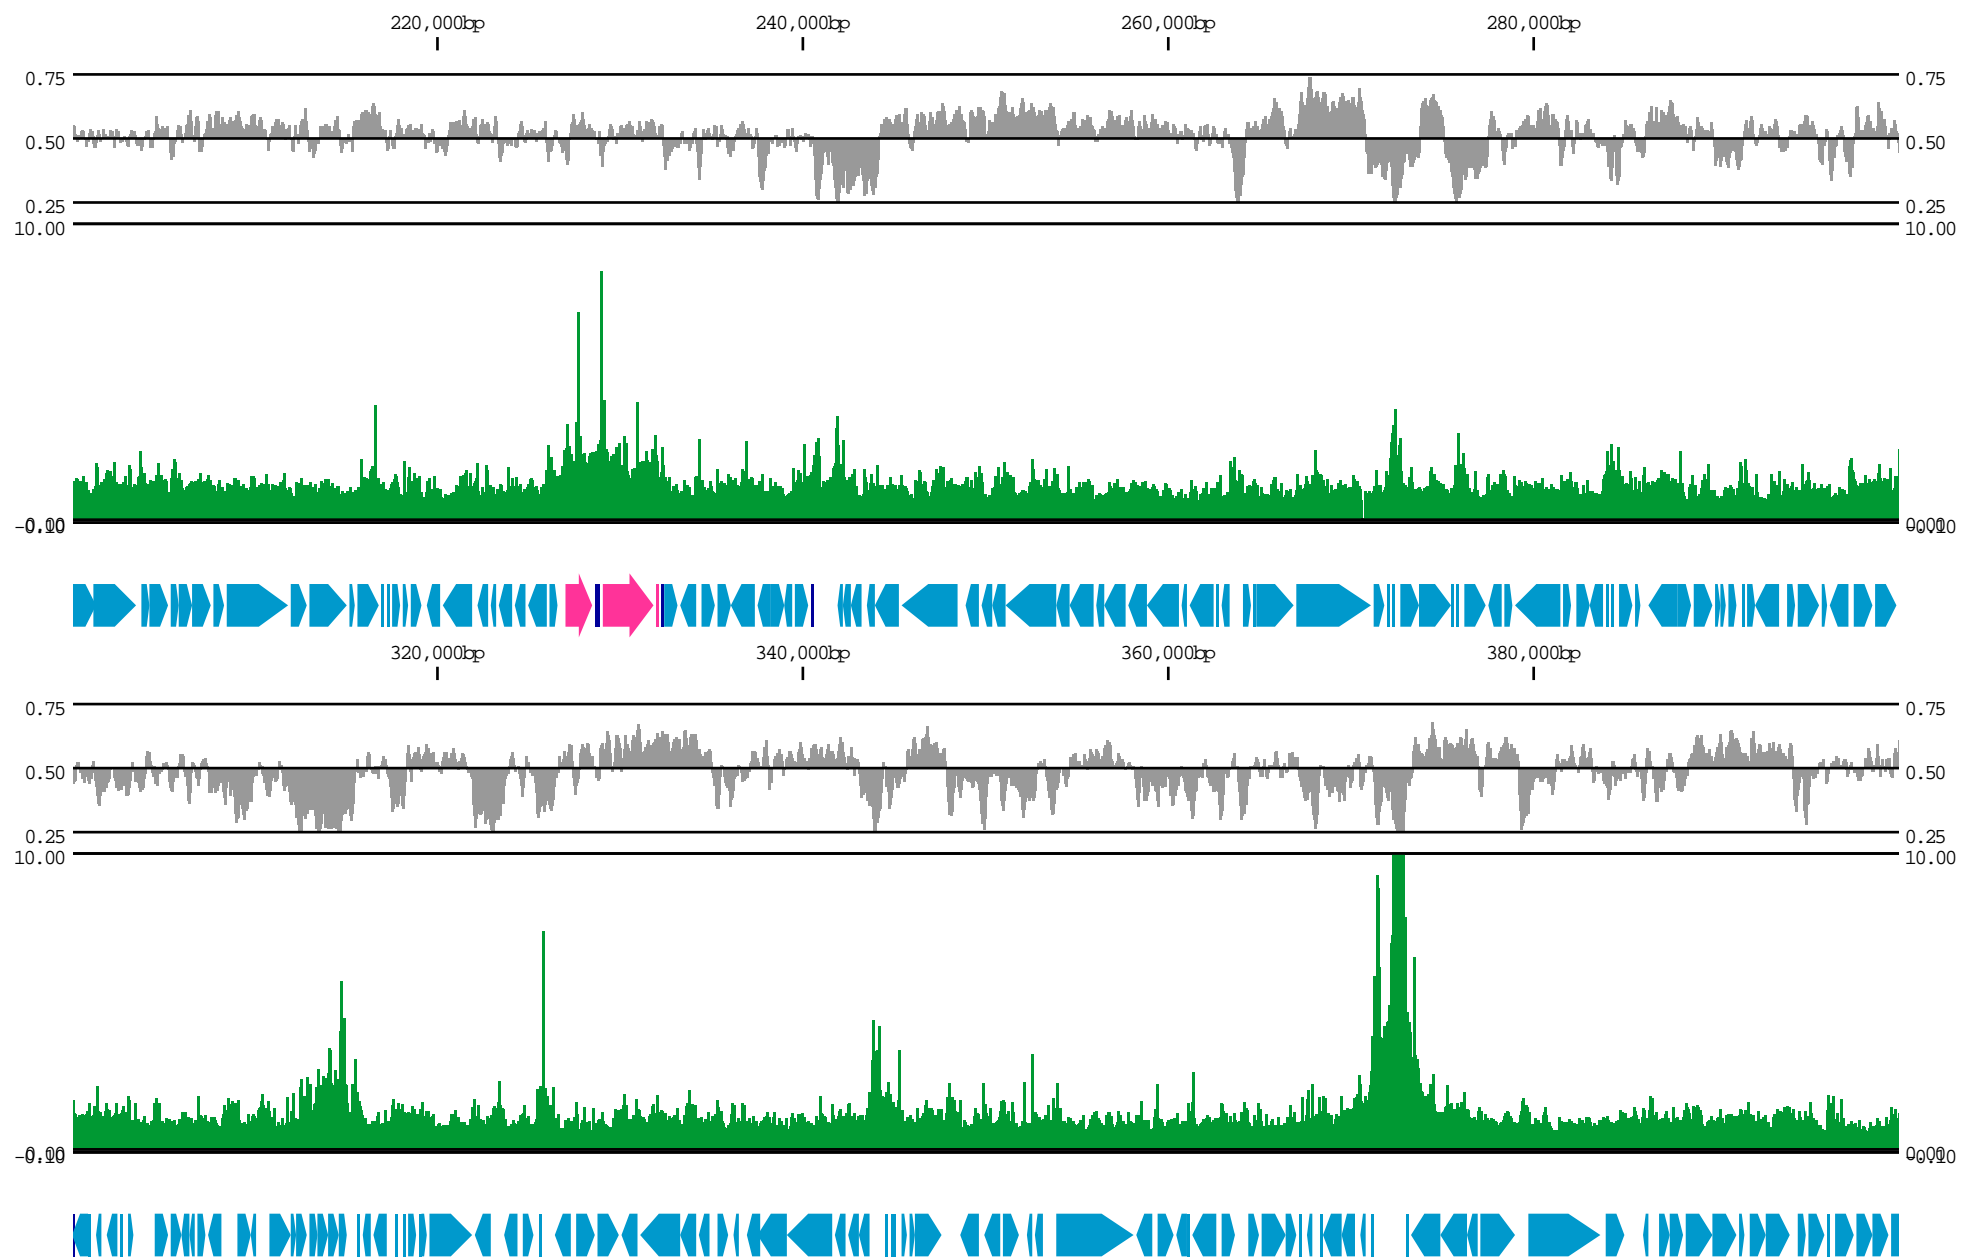

Fig. S1 (cont.)

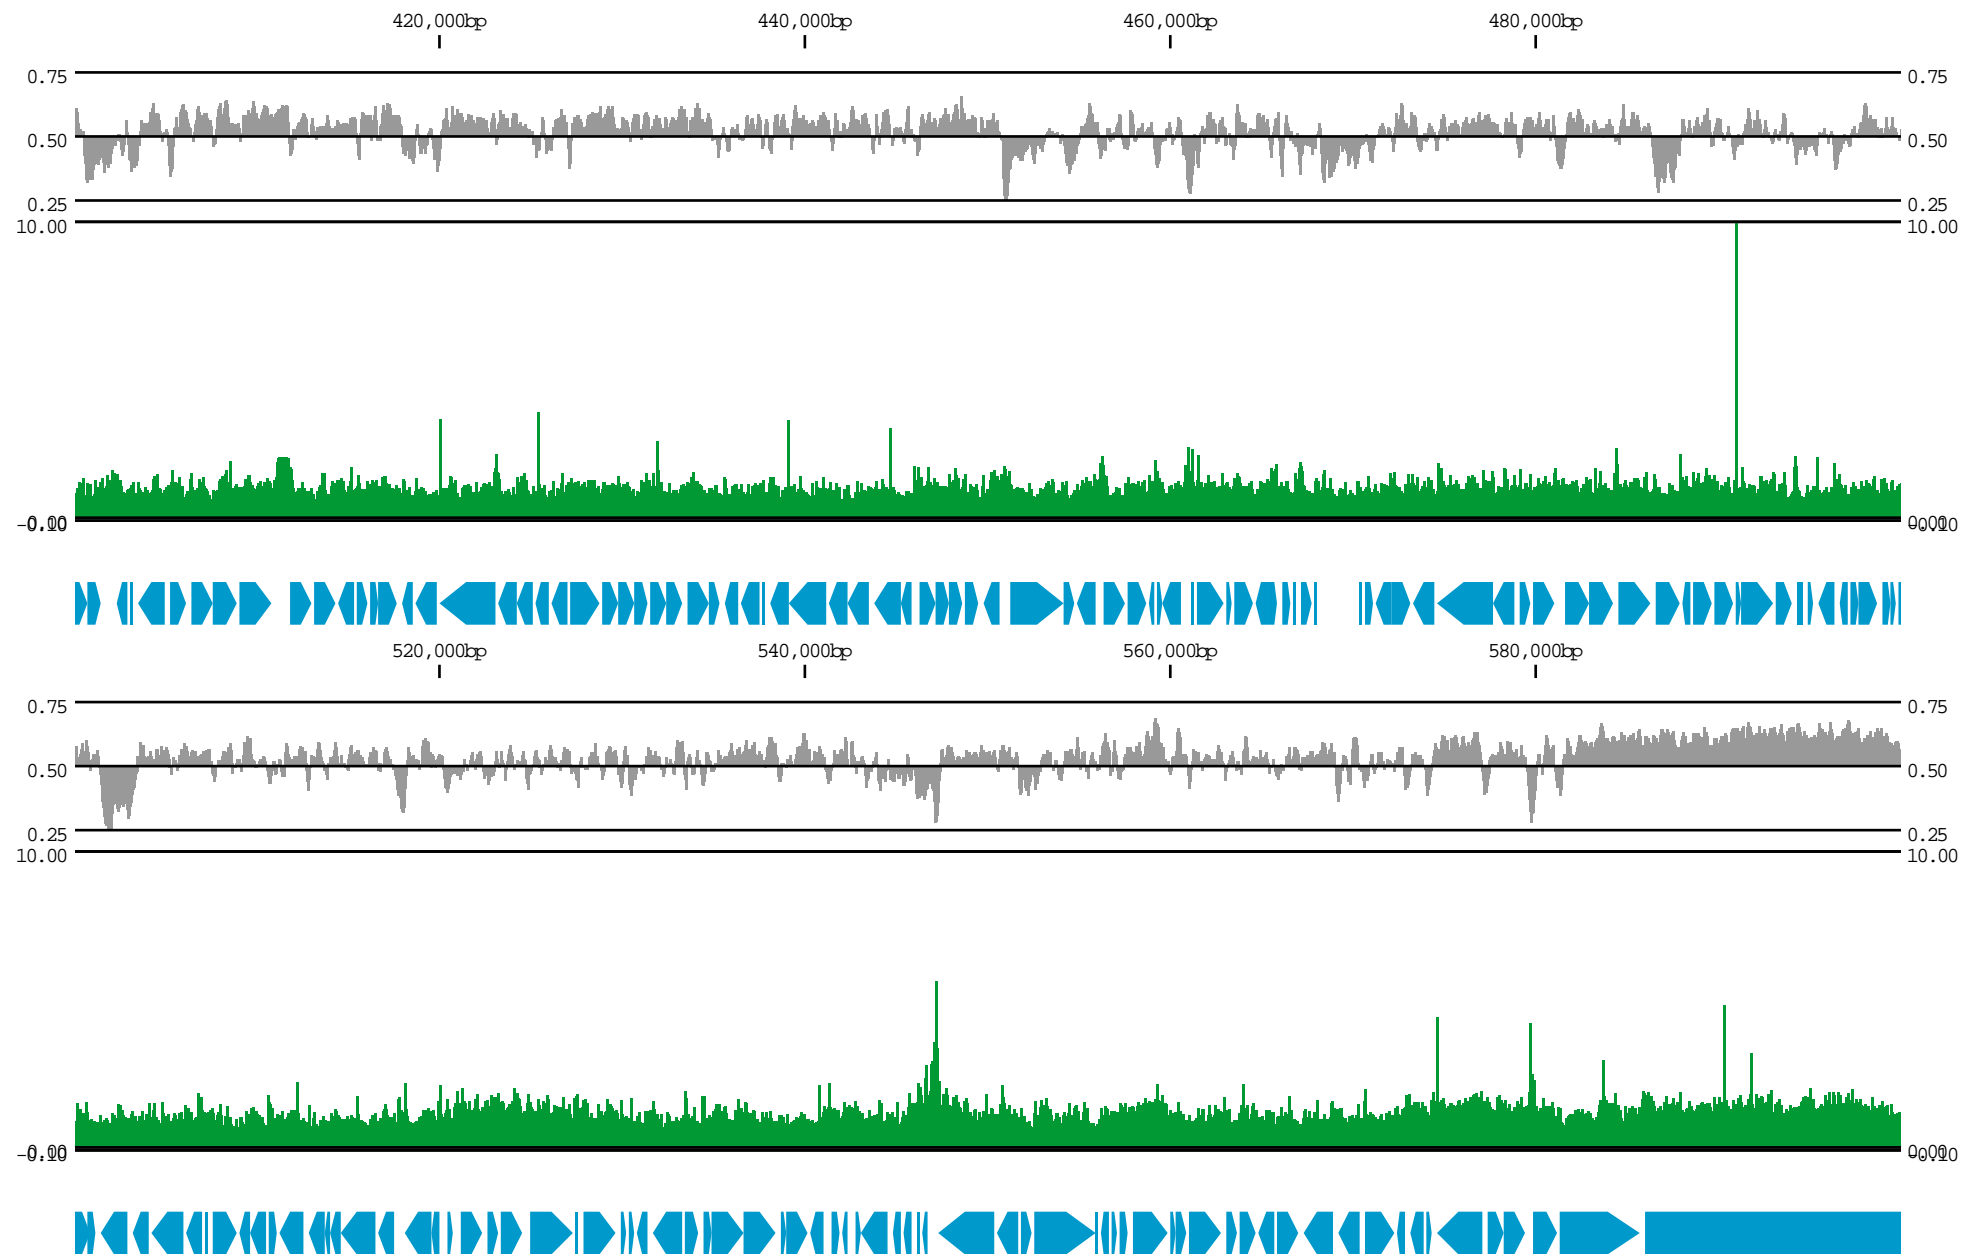

Fig. S1 (cont.)

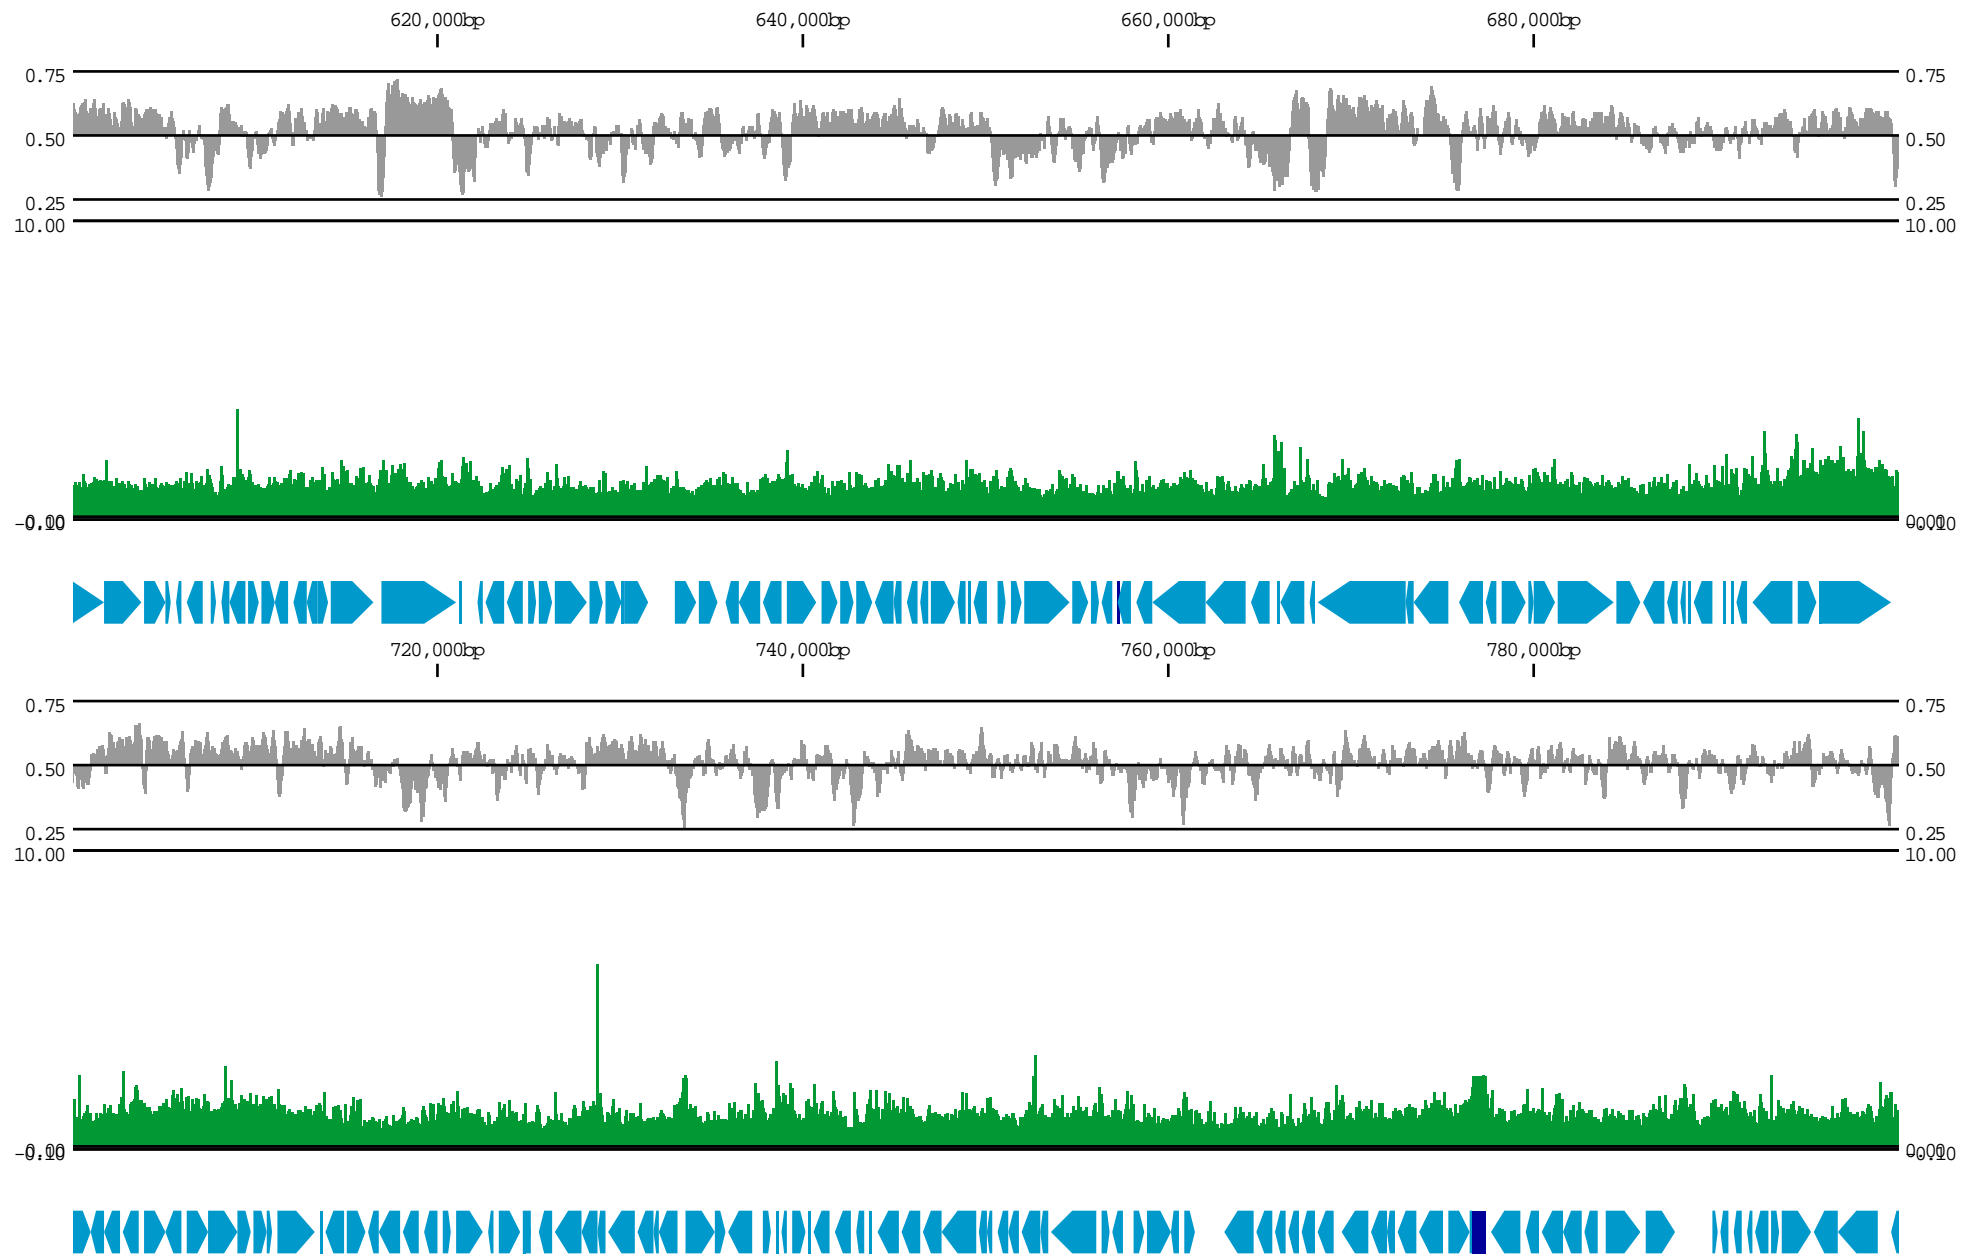

Fig. S1 (cont.)

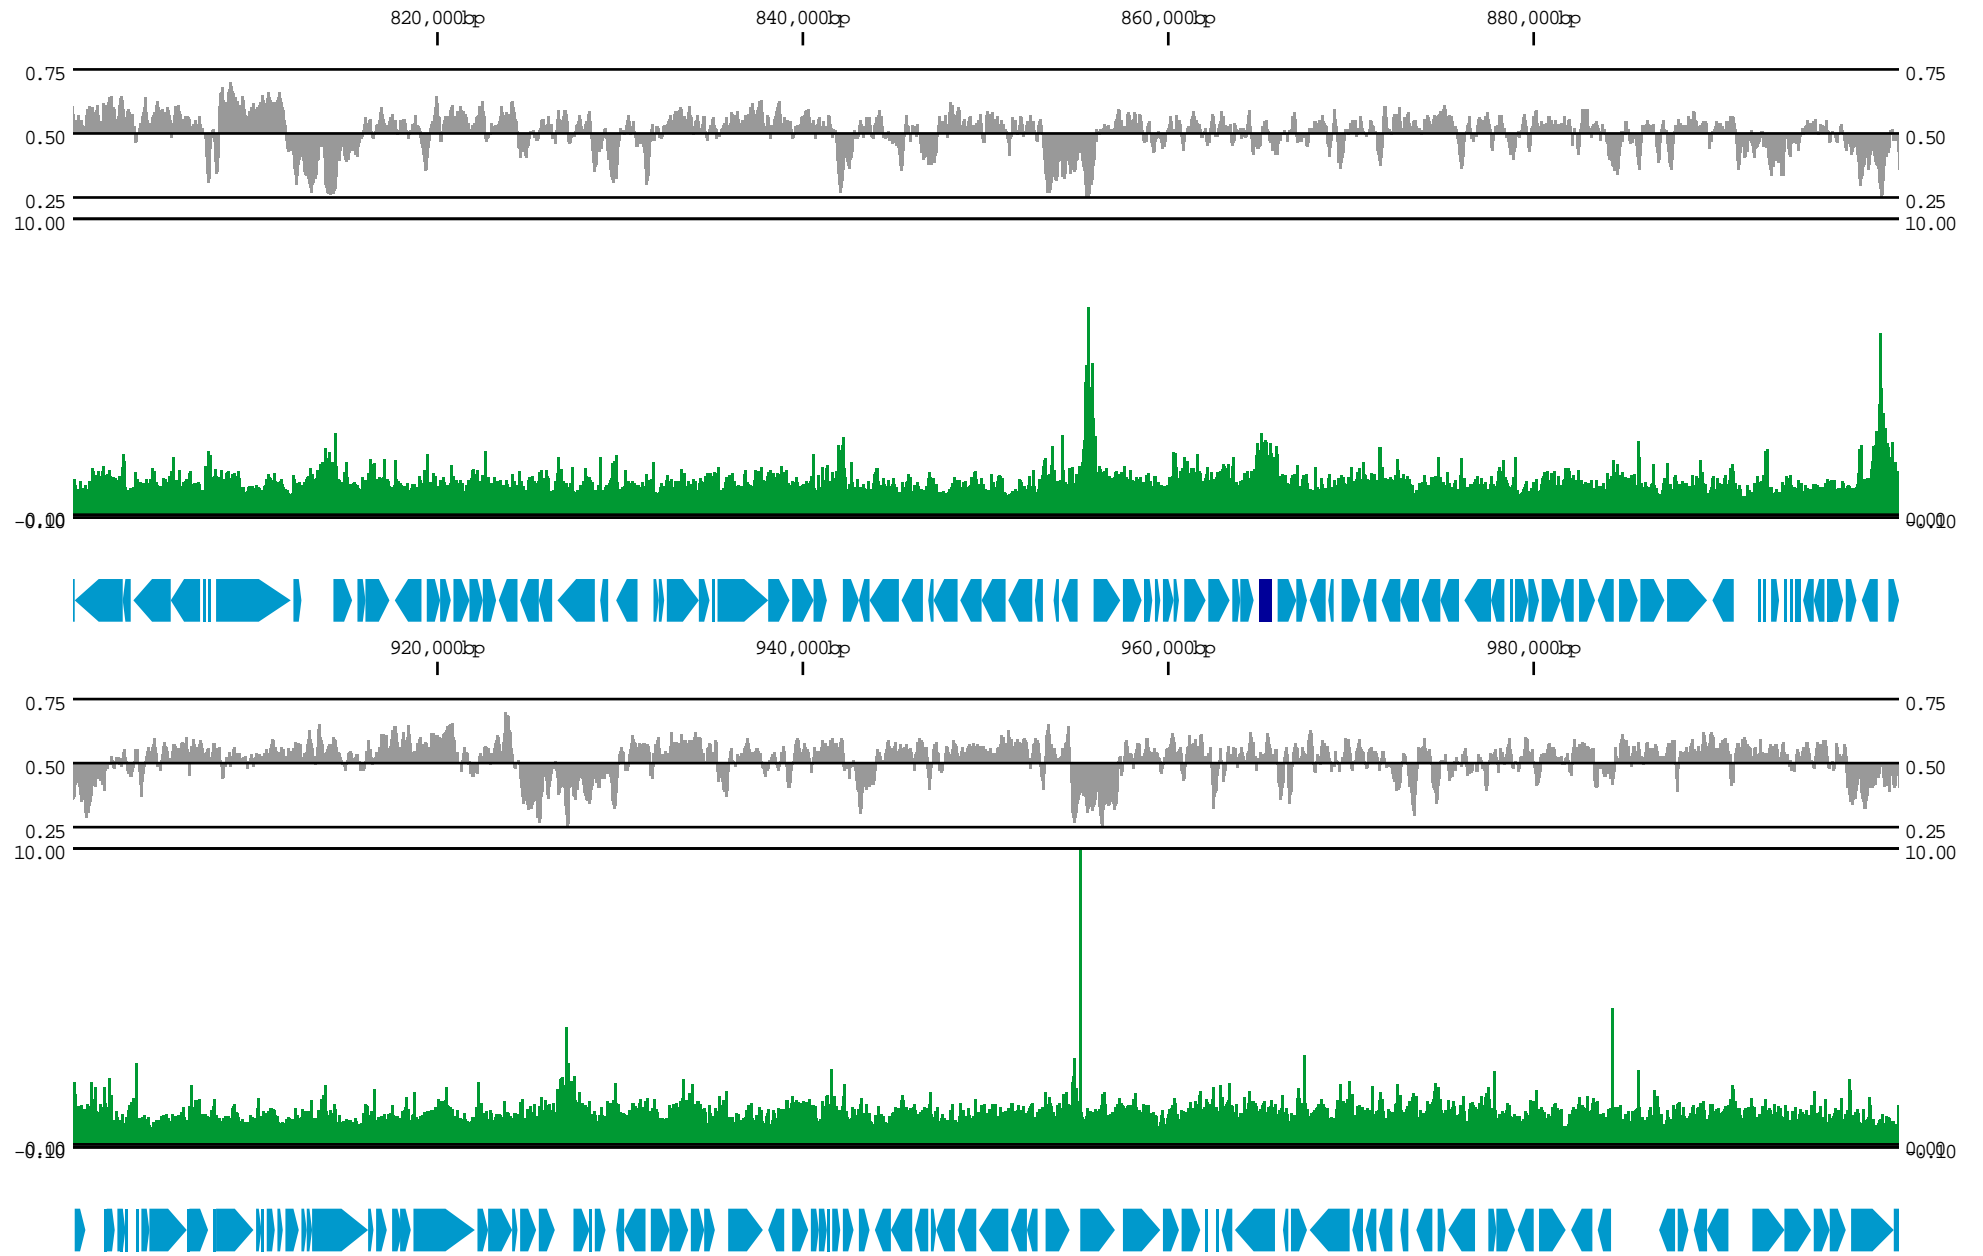

Fig. S1 (cont.)

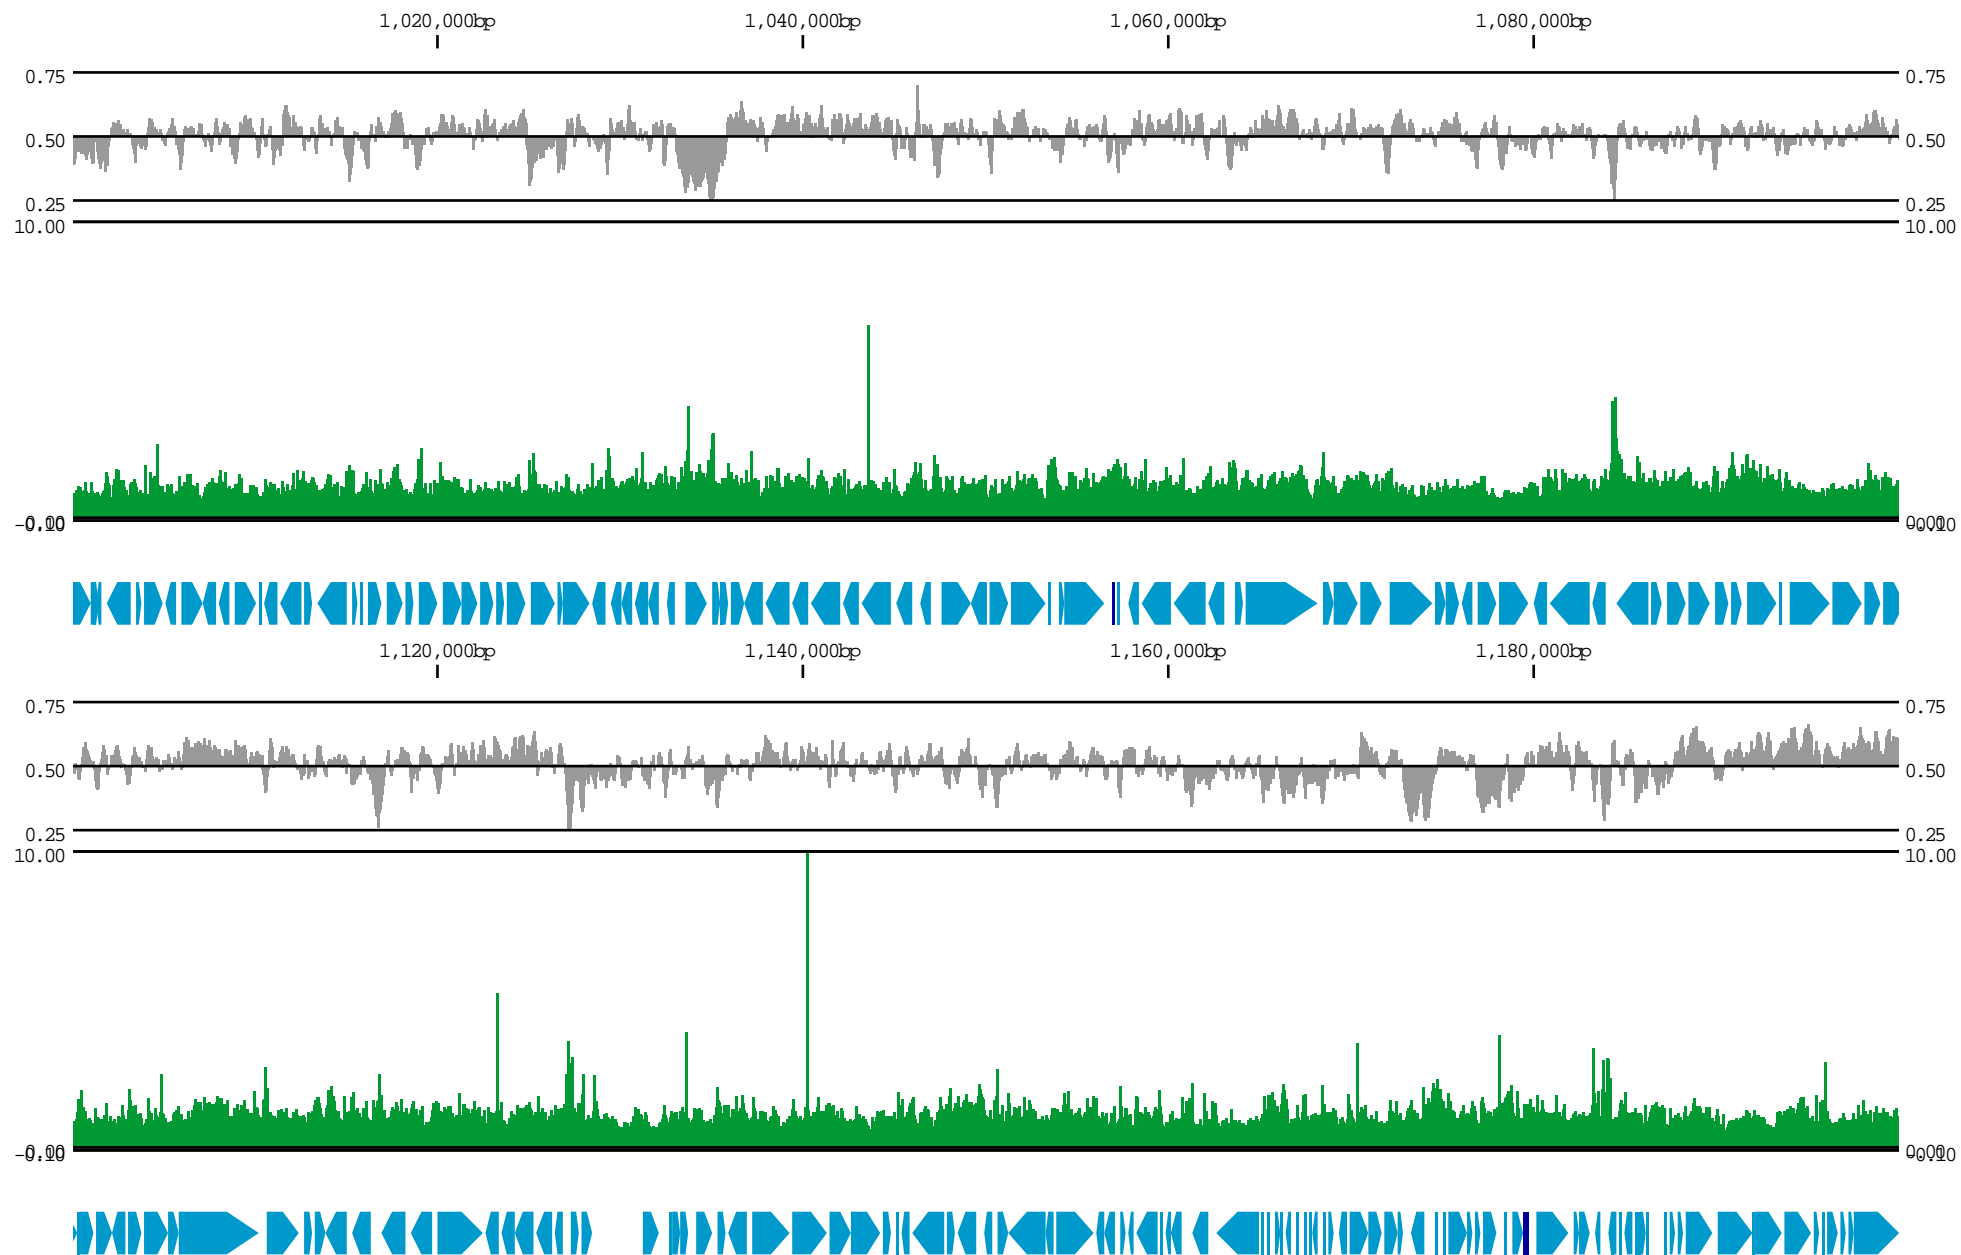

Fig. S1 (cont.)

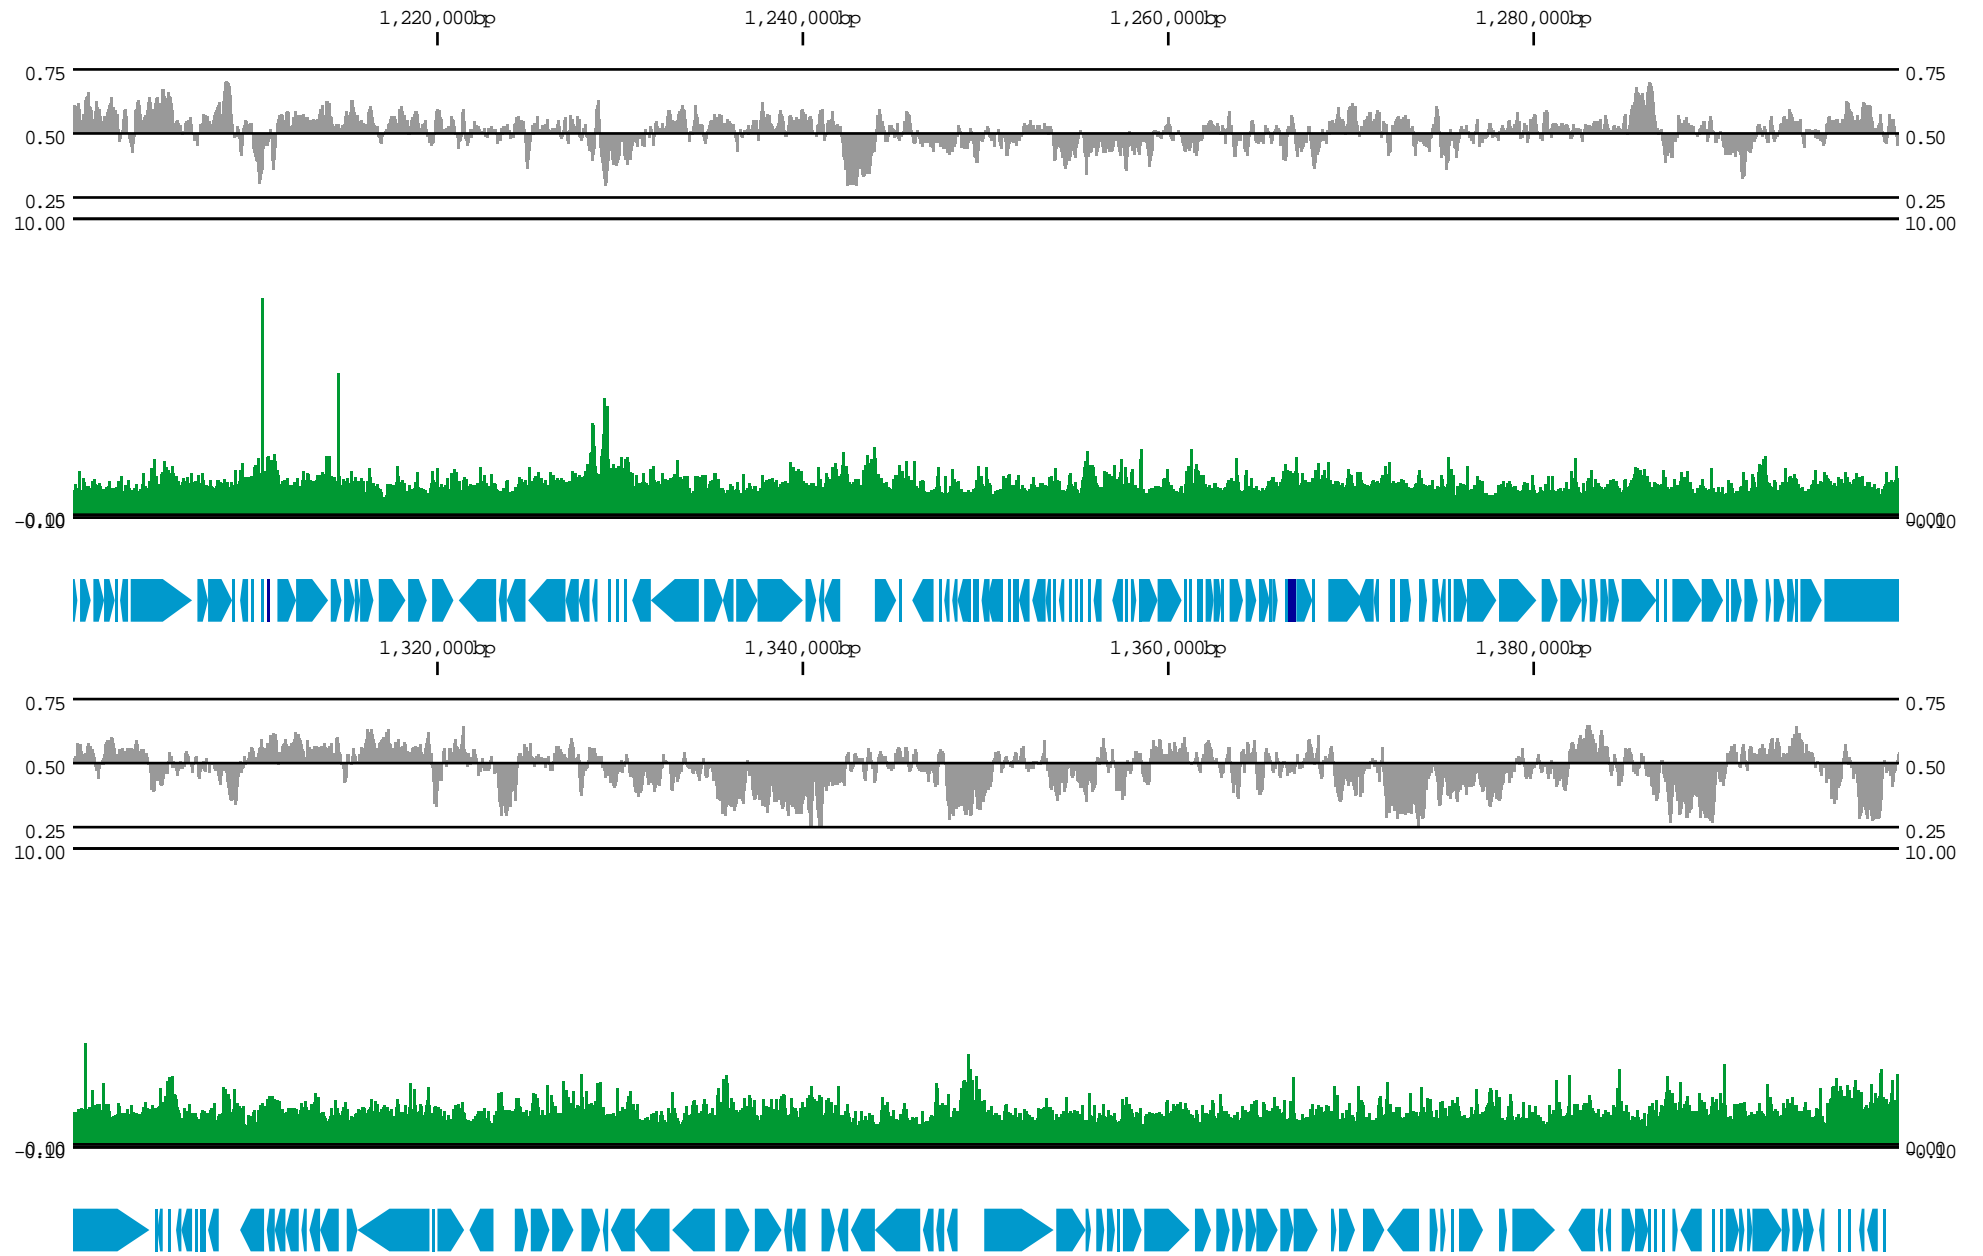



Fig. S1 (cont.)

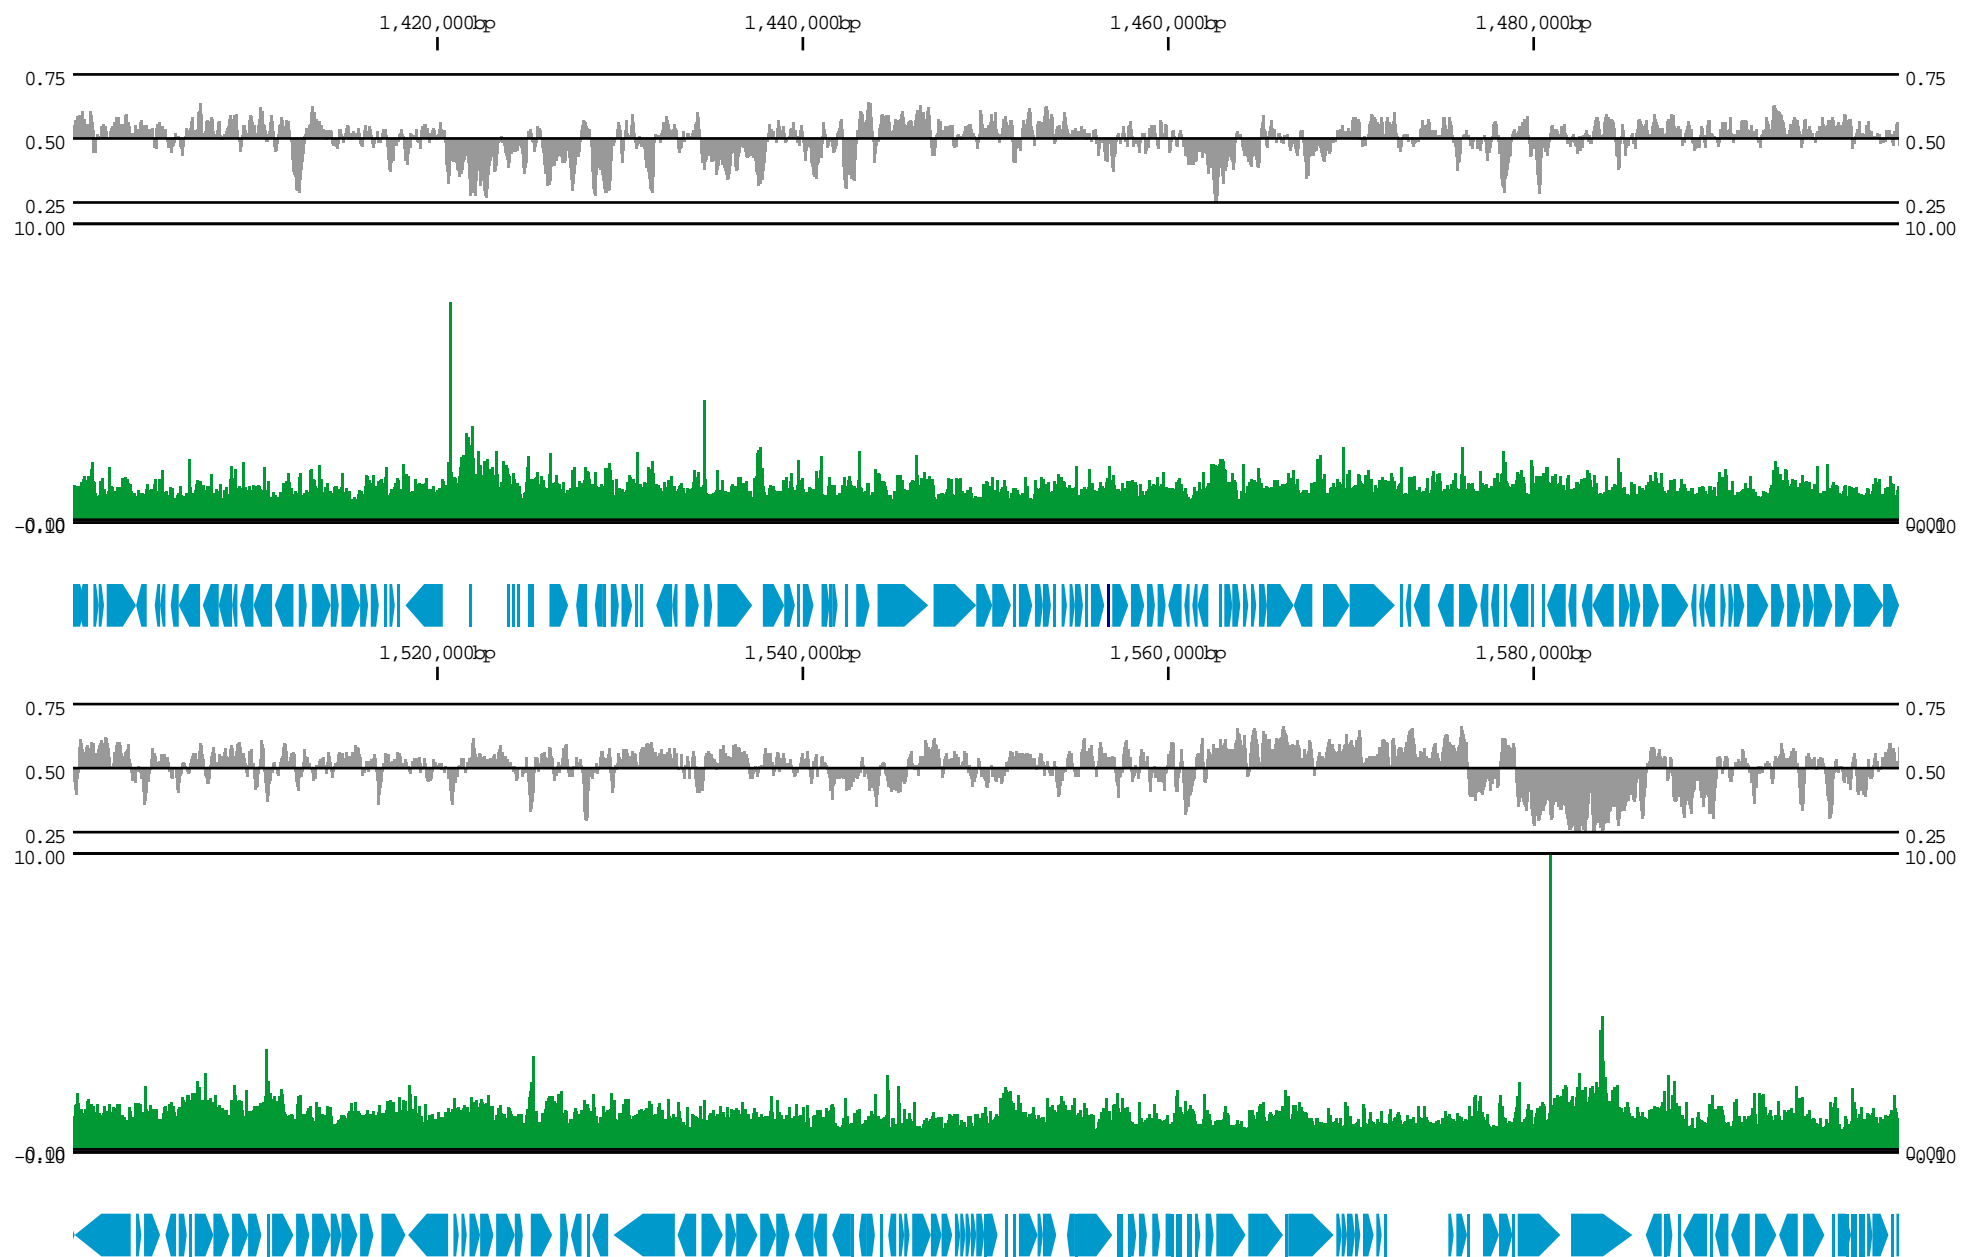

Fig. S1 (cont.)

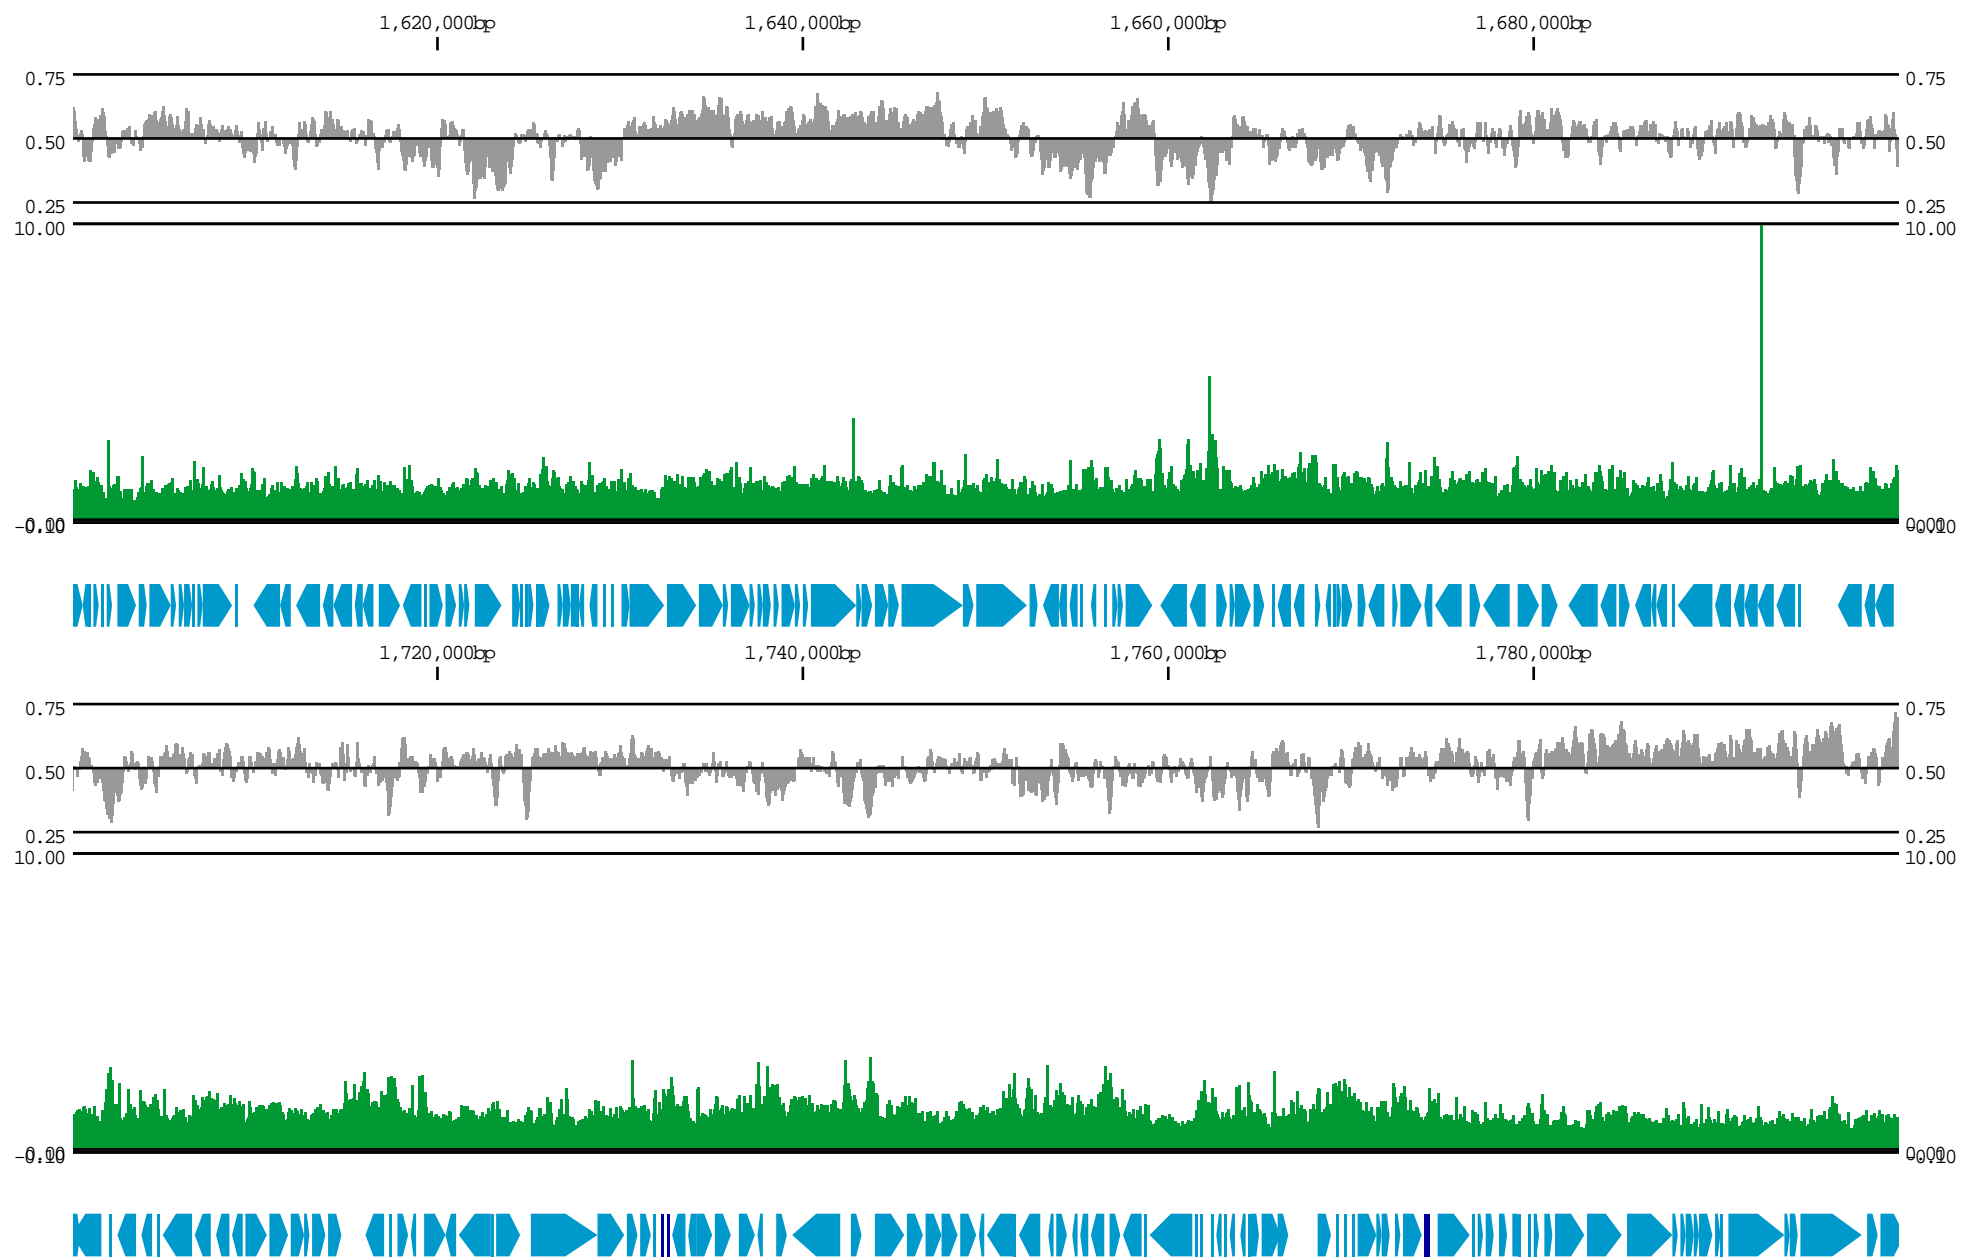

Fig. S1 (cont.)

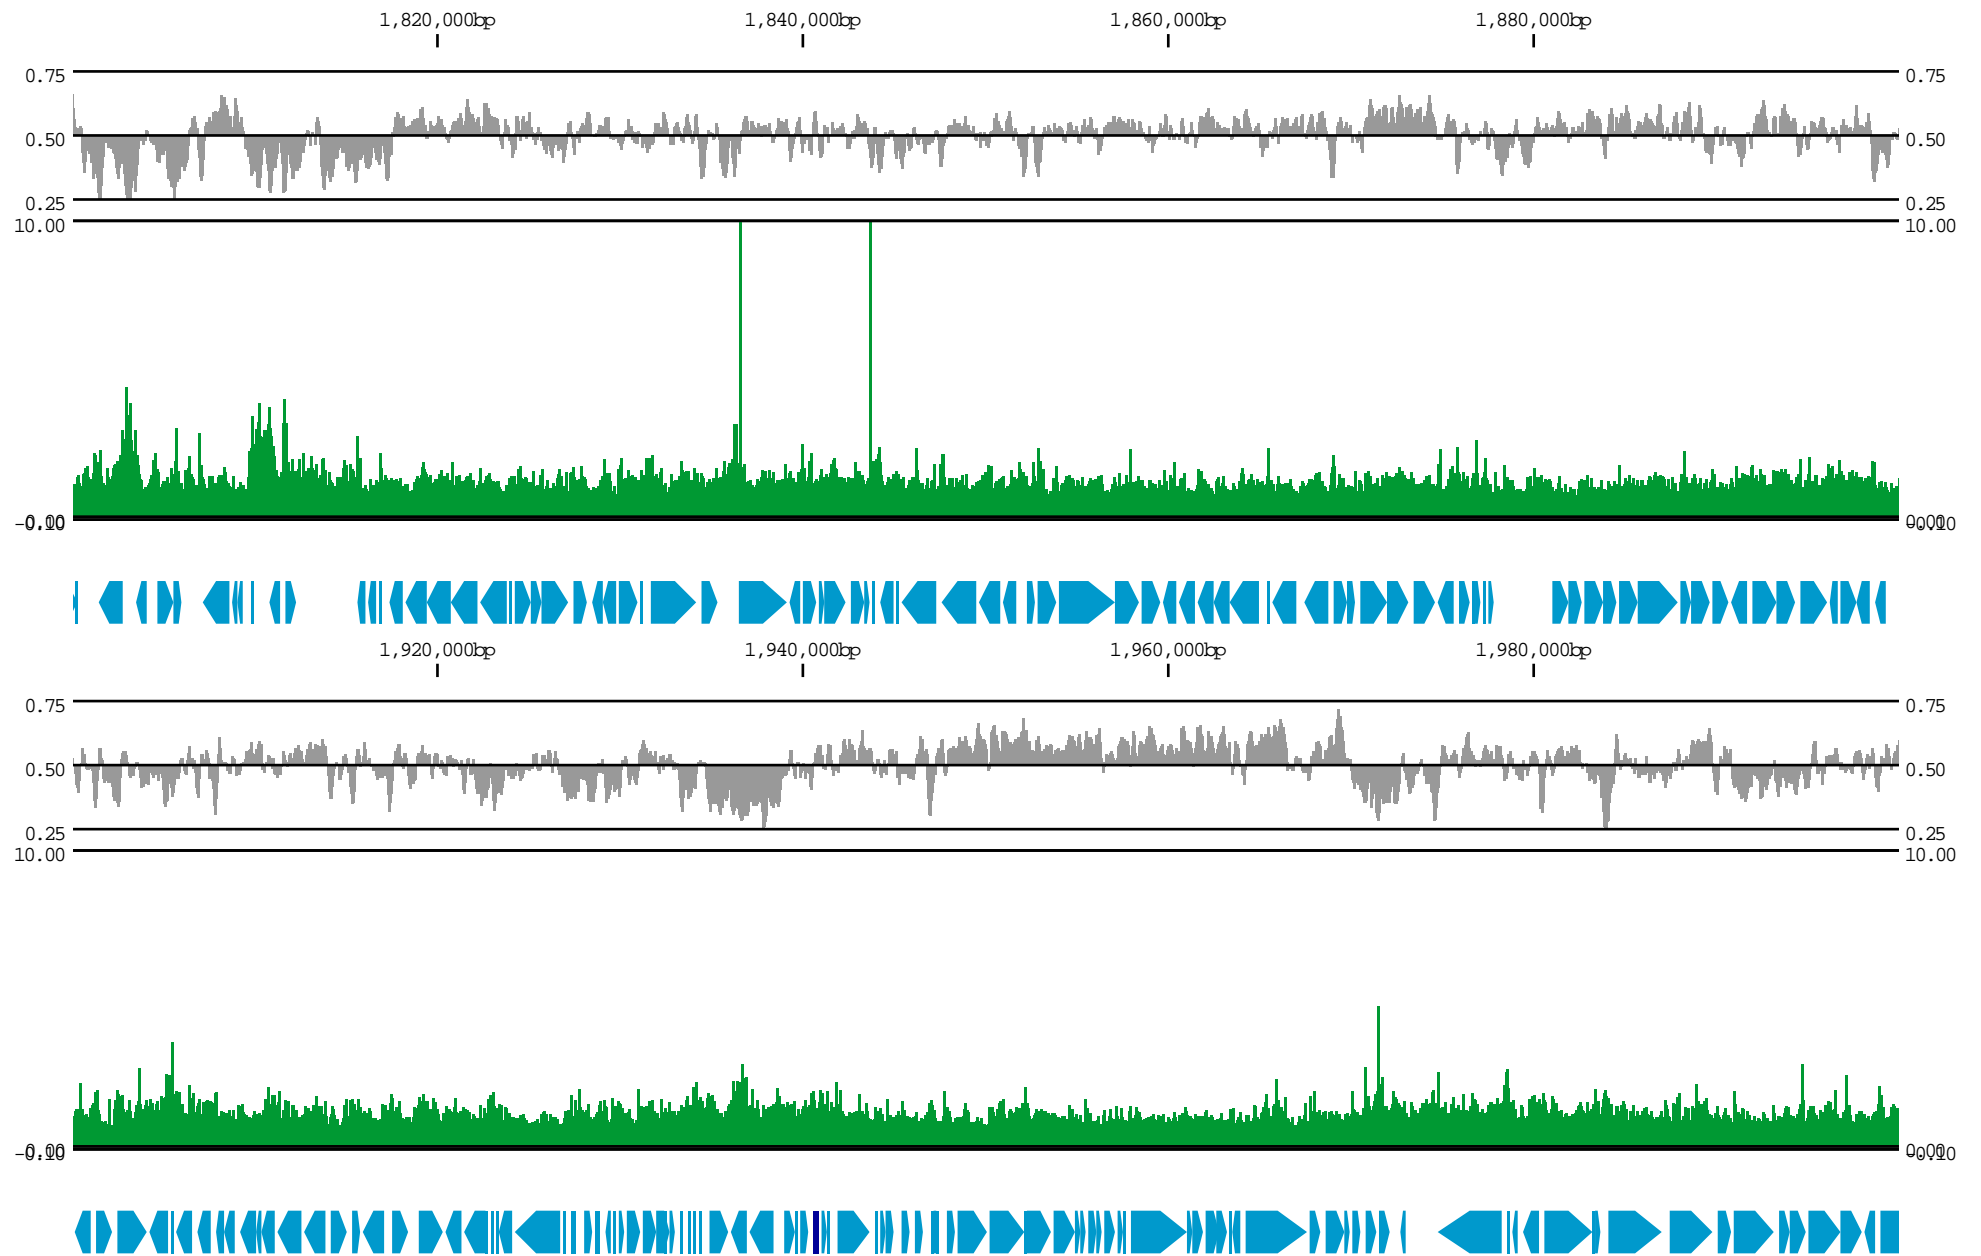

Fig. S1 (cont.)

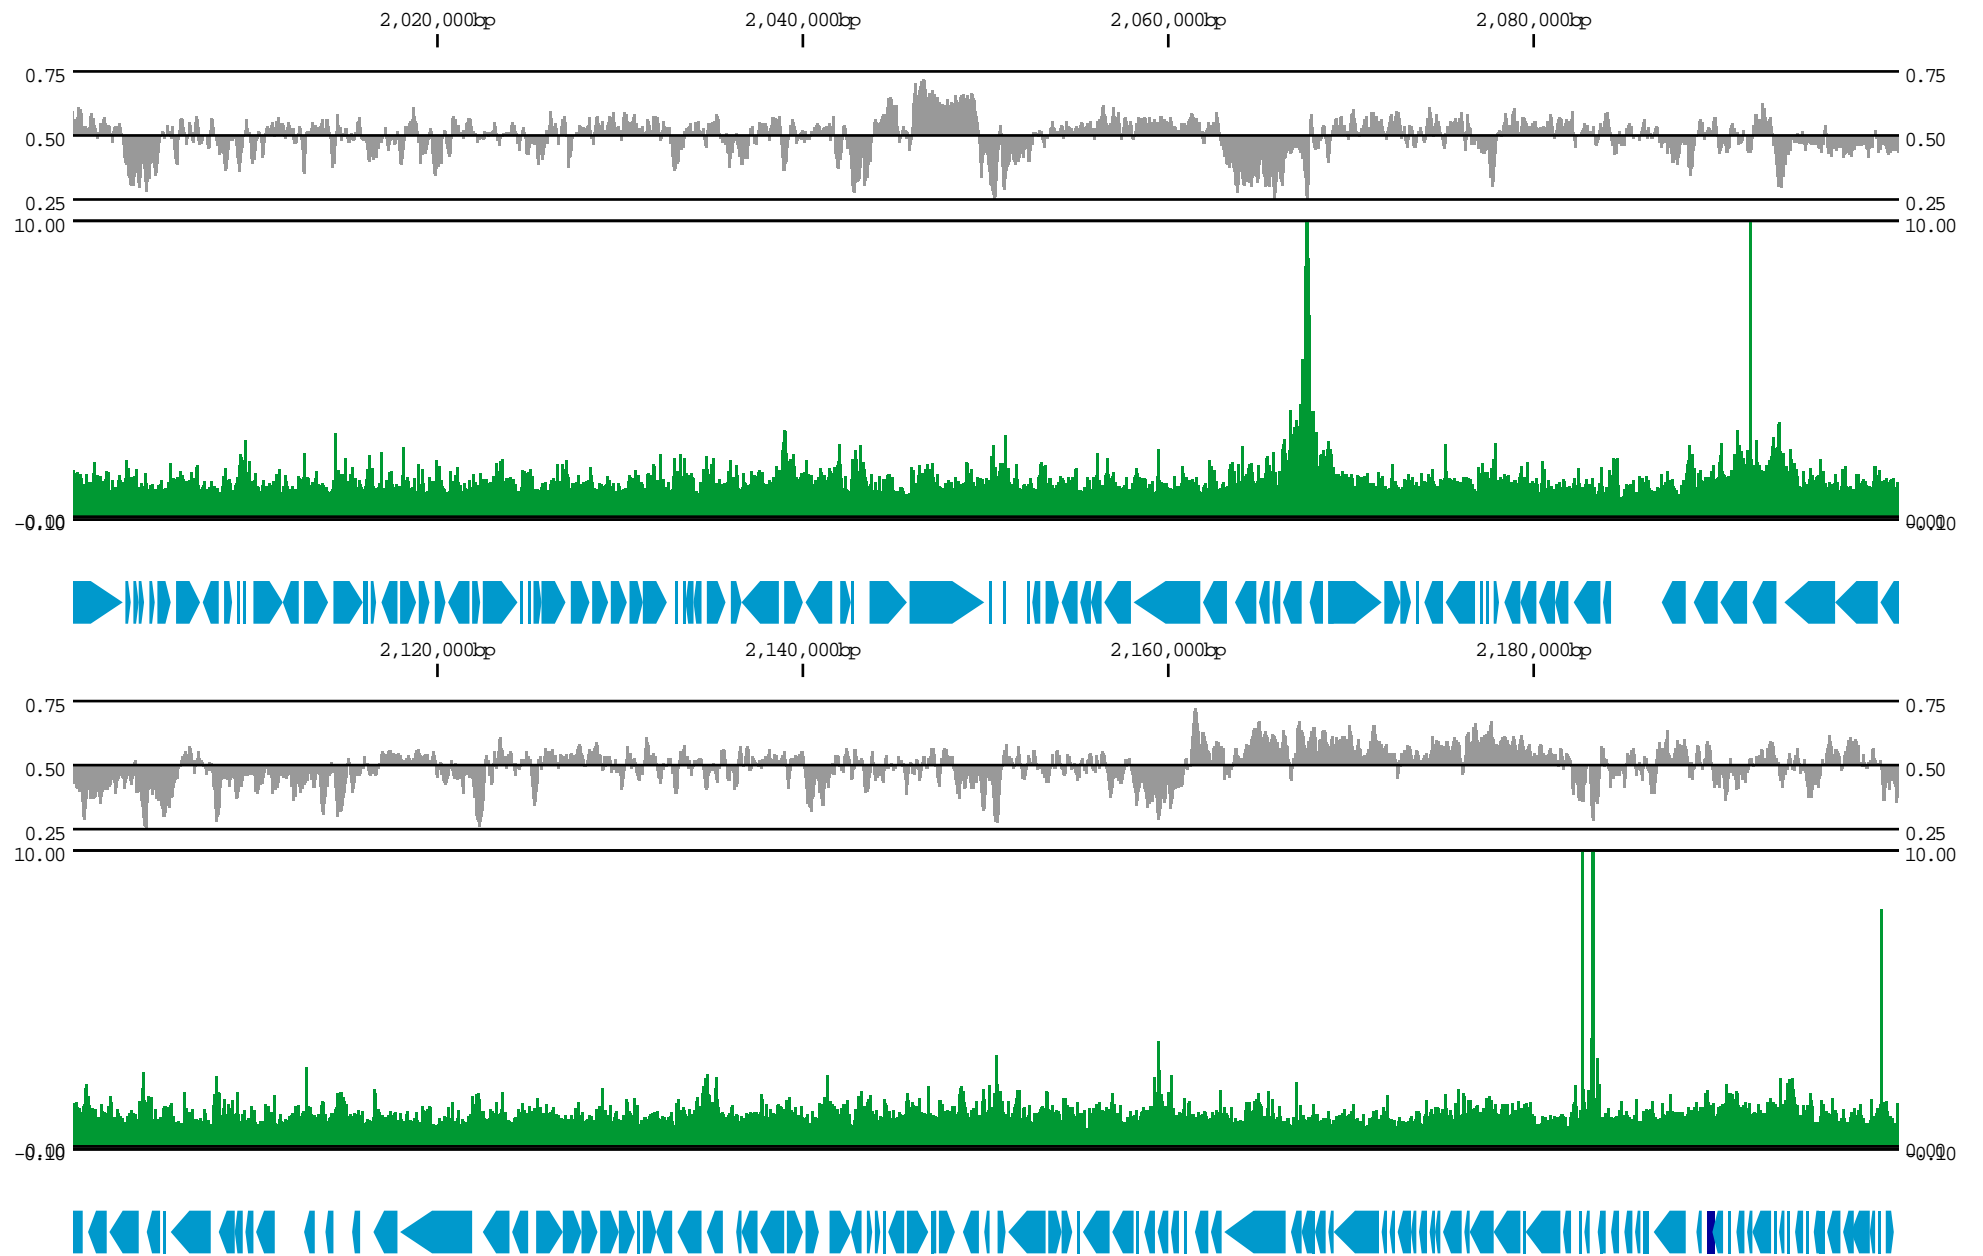

Fig. S1 (cont.)

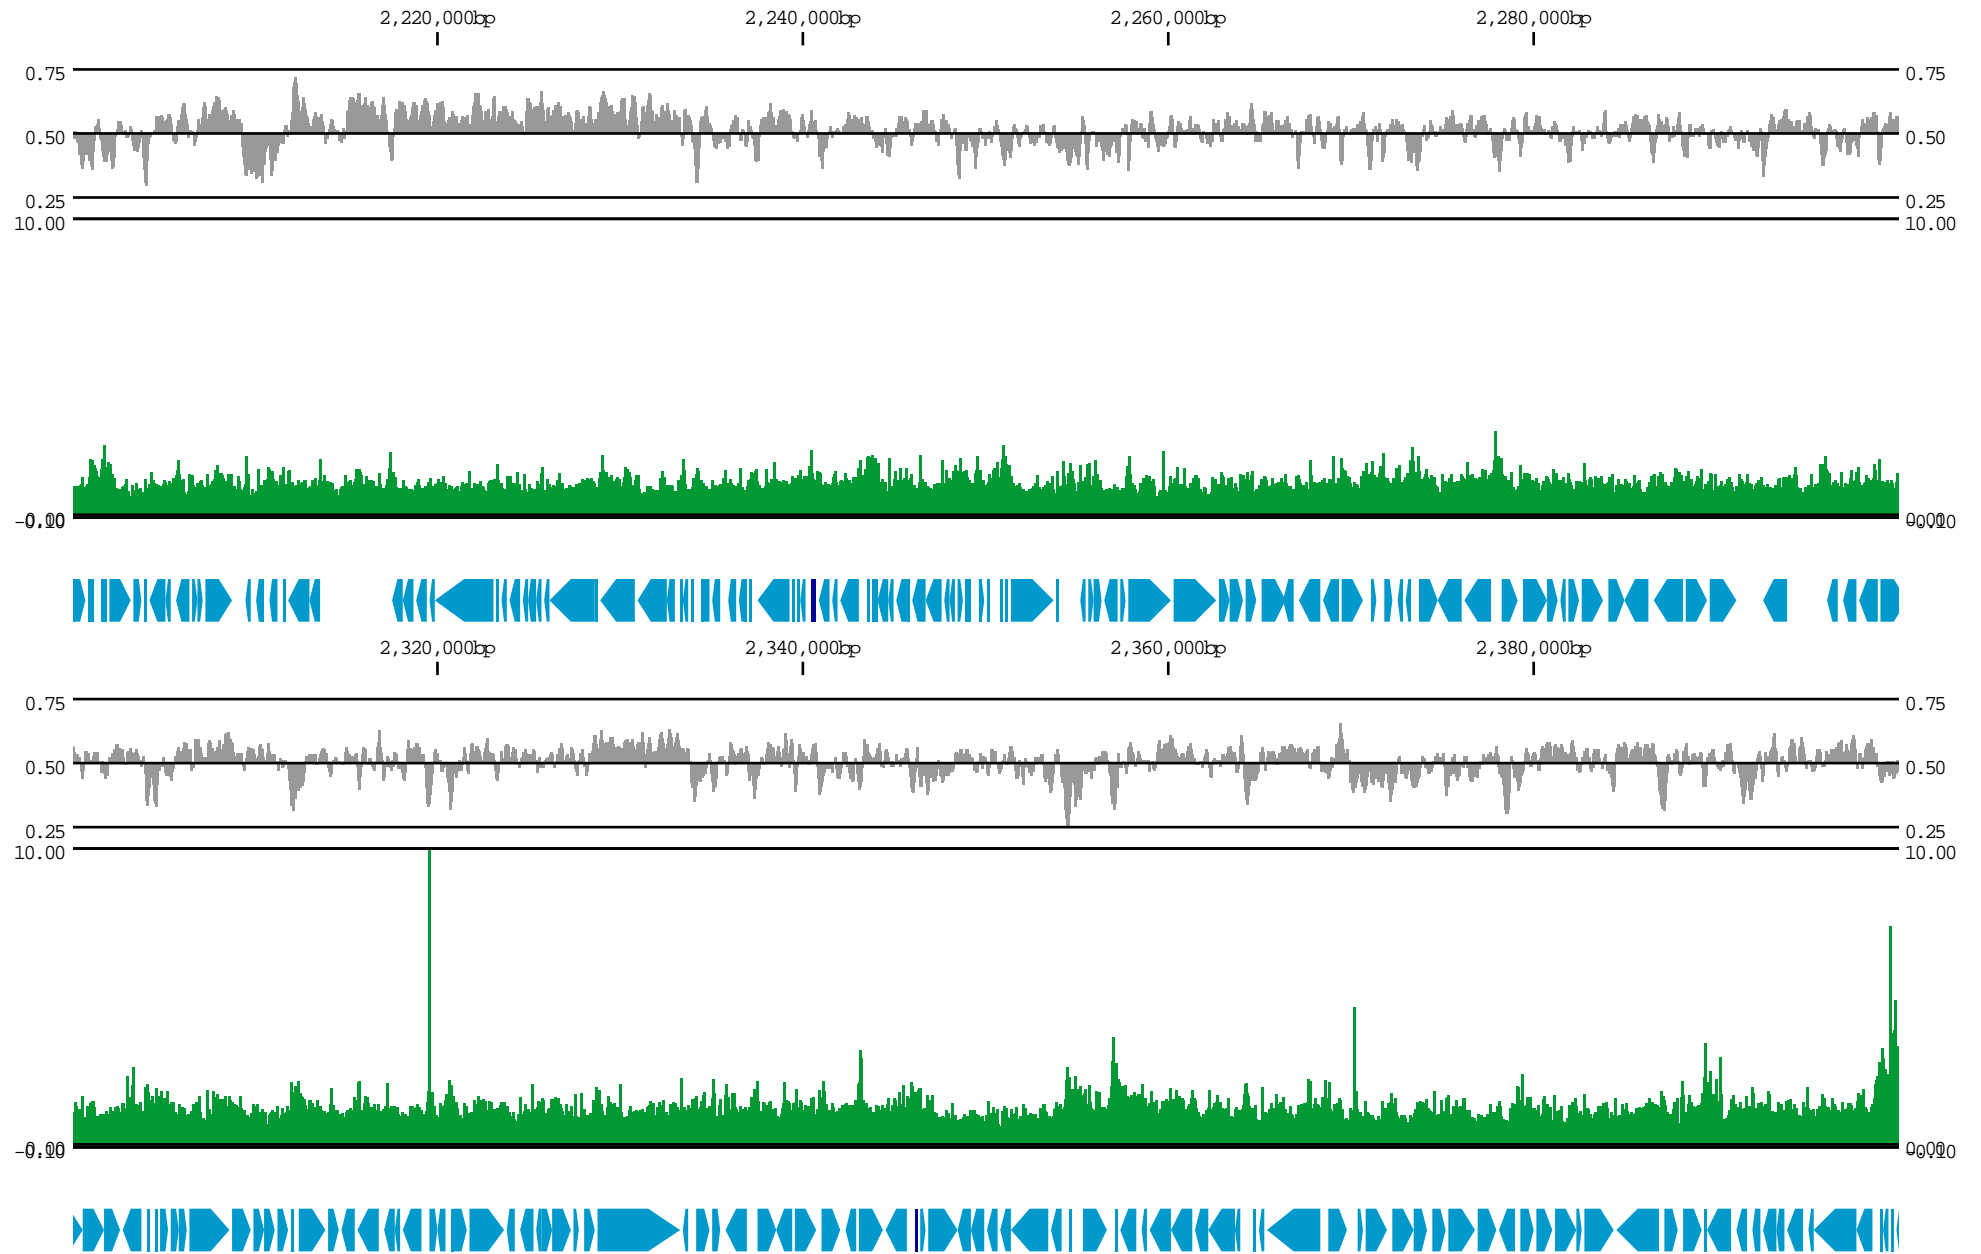

Fig. S1 (cont.)

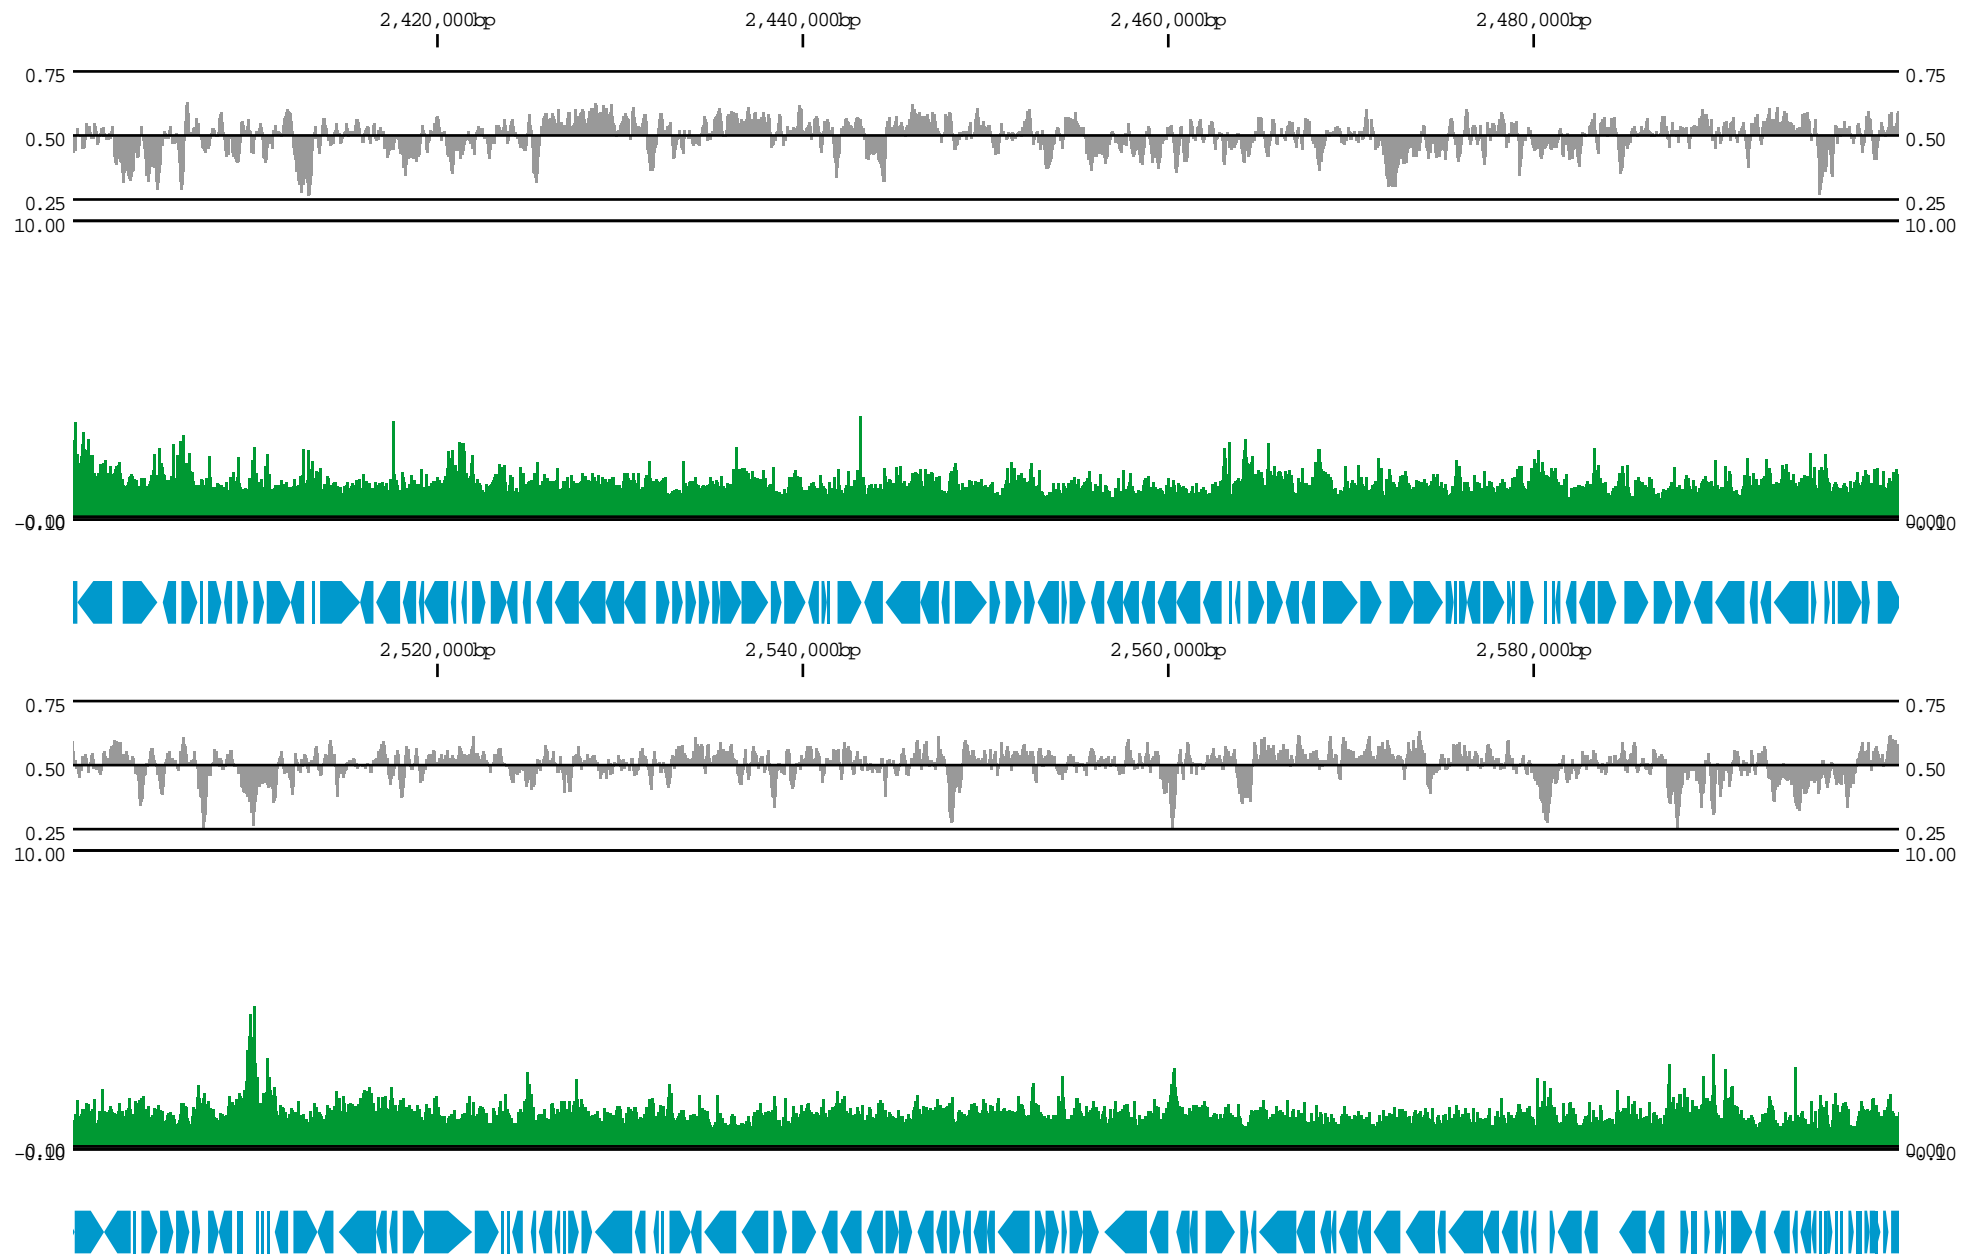

Fig. S1 (cont.)

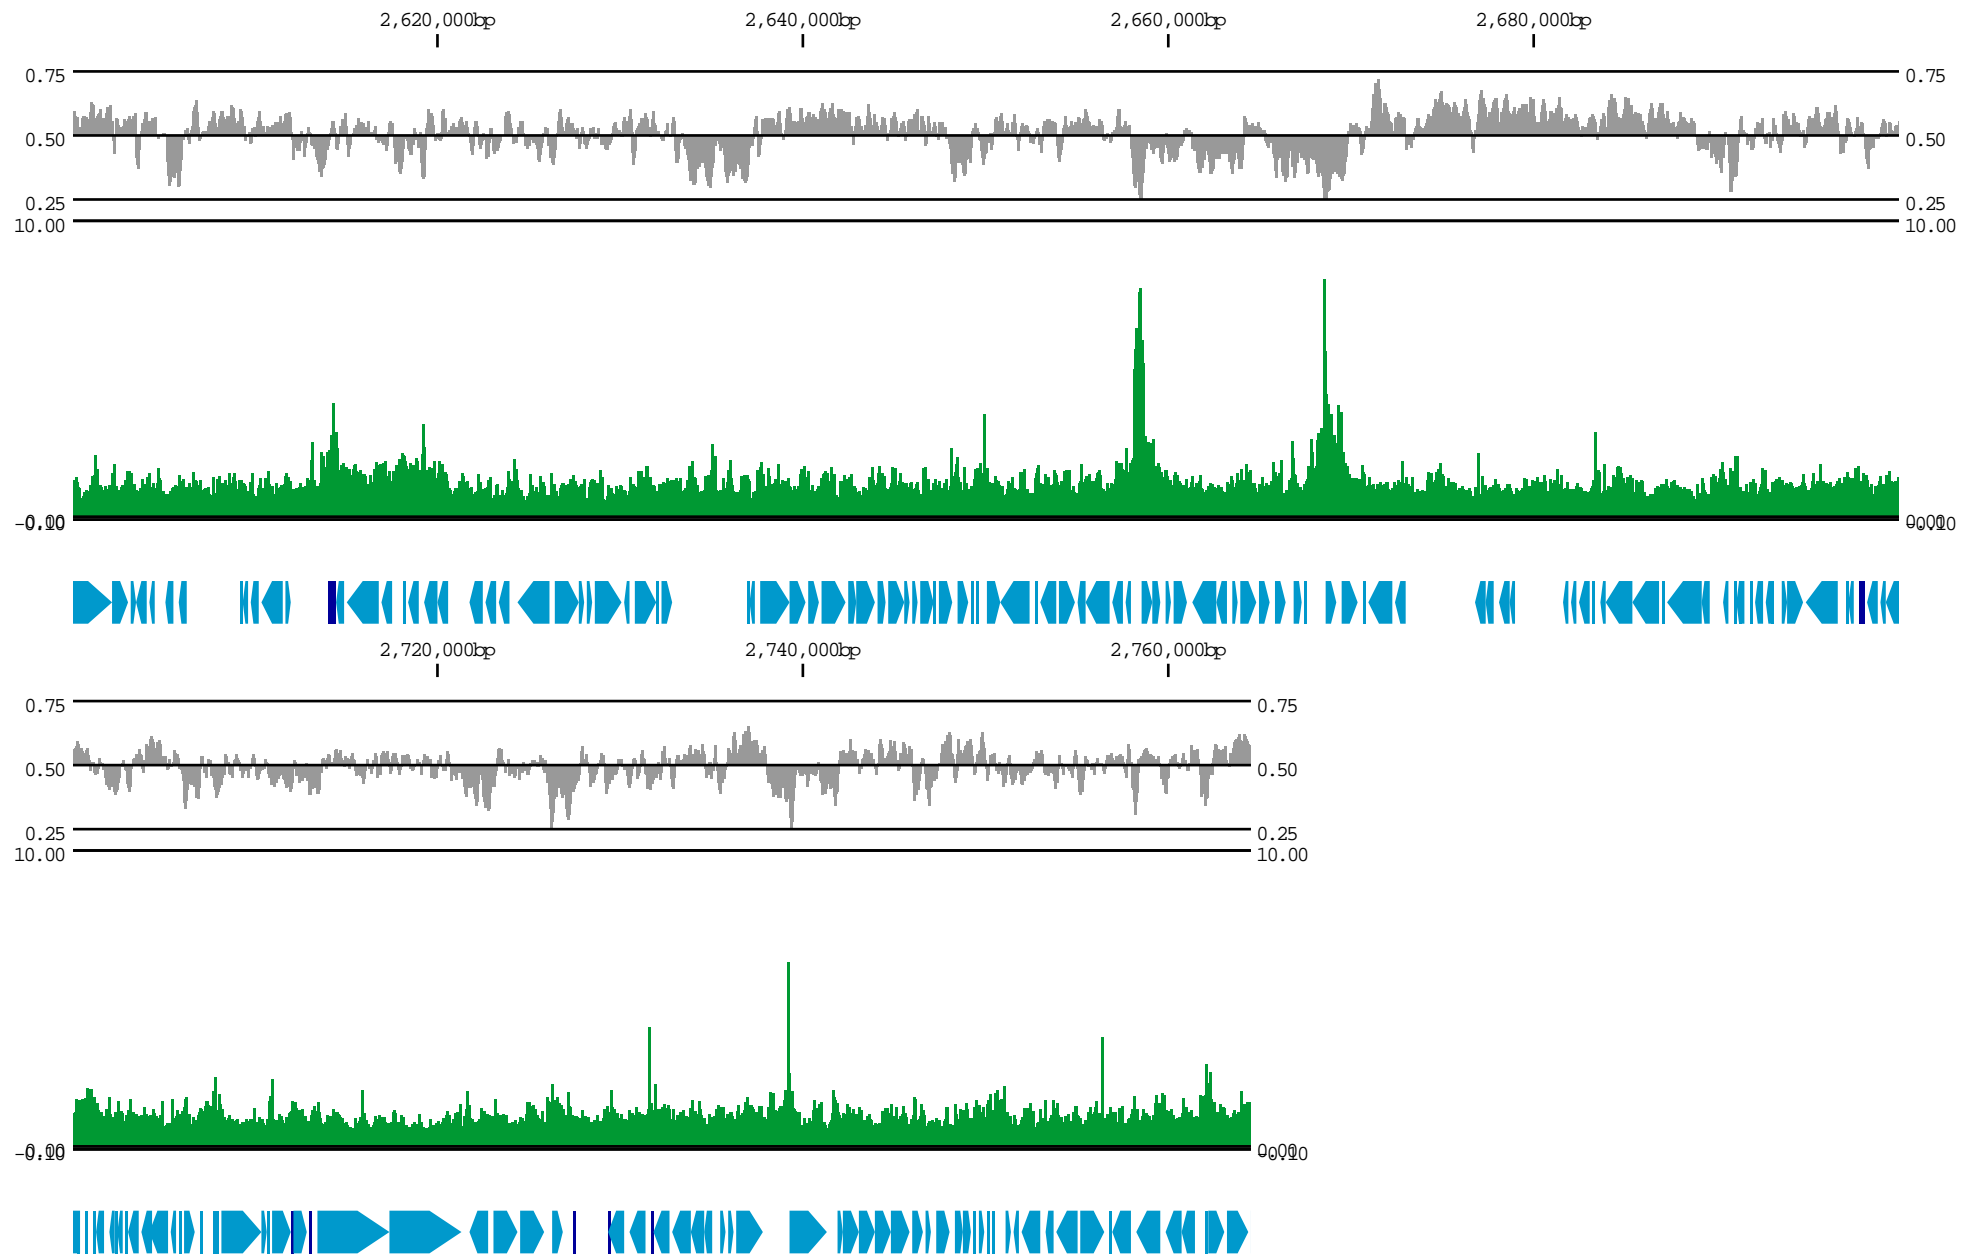

Fig. S1 (cont.)

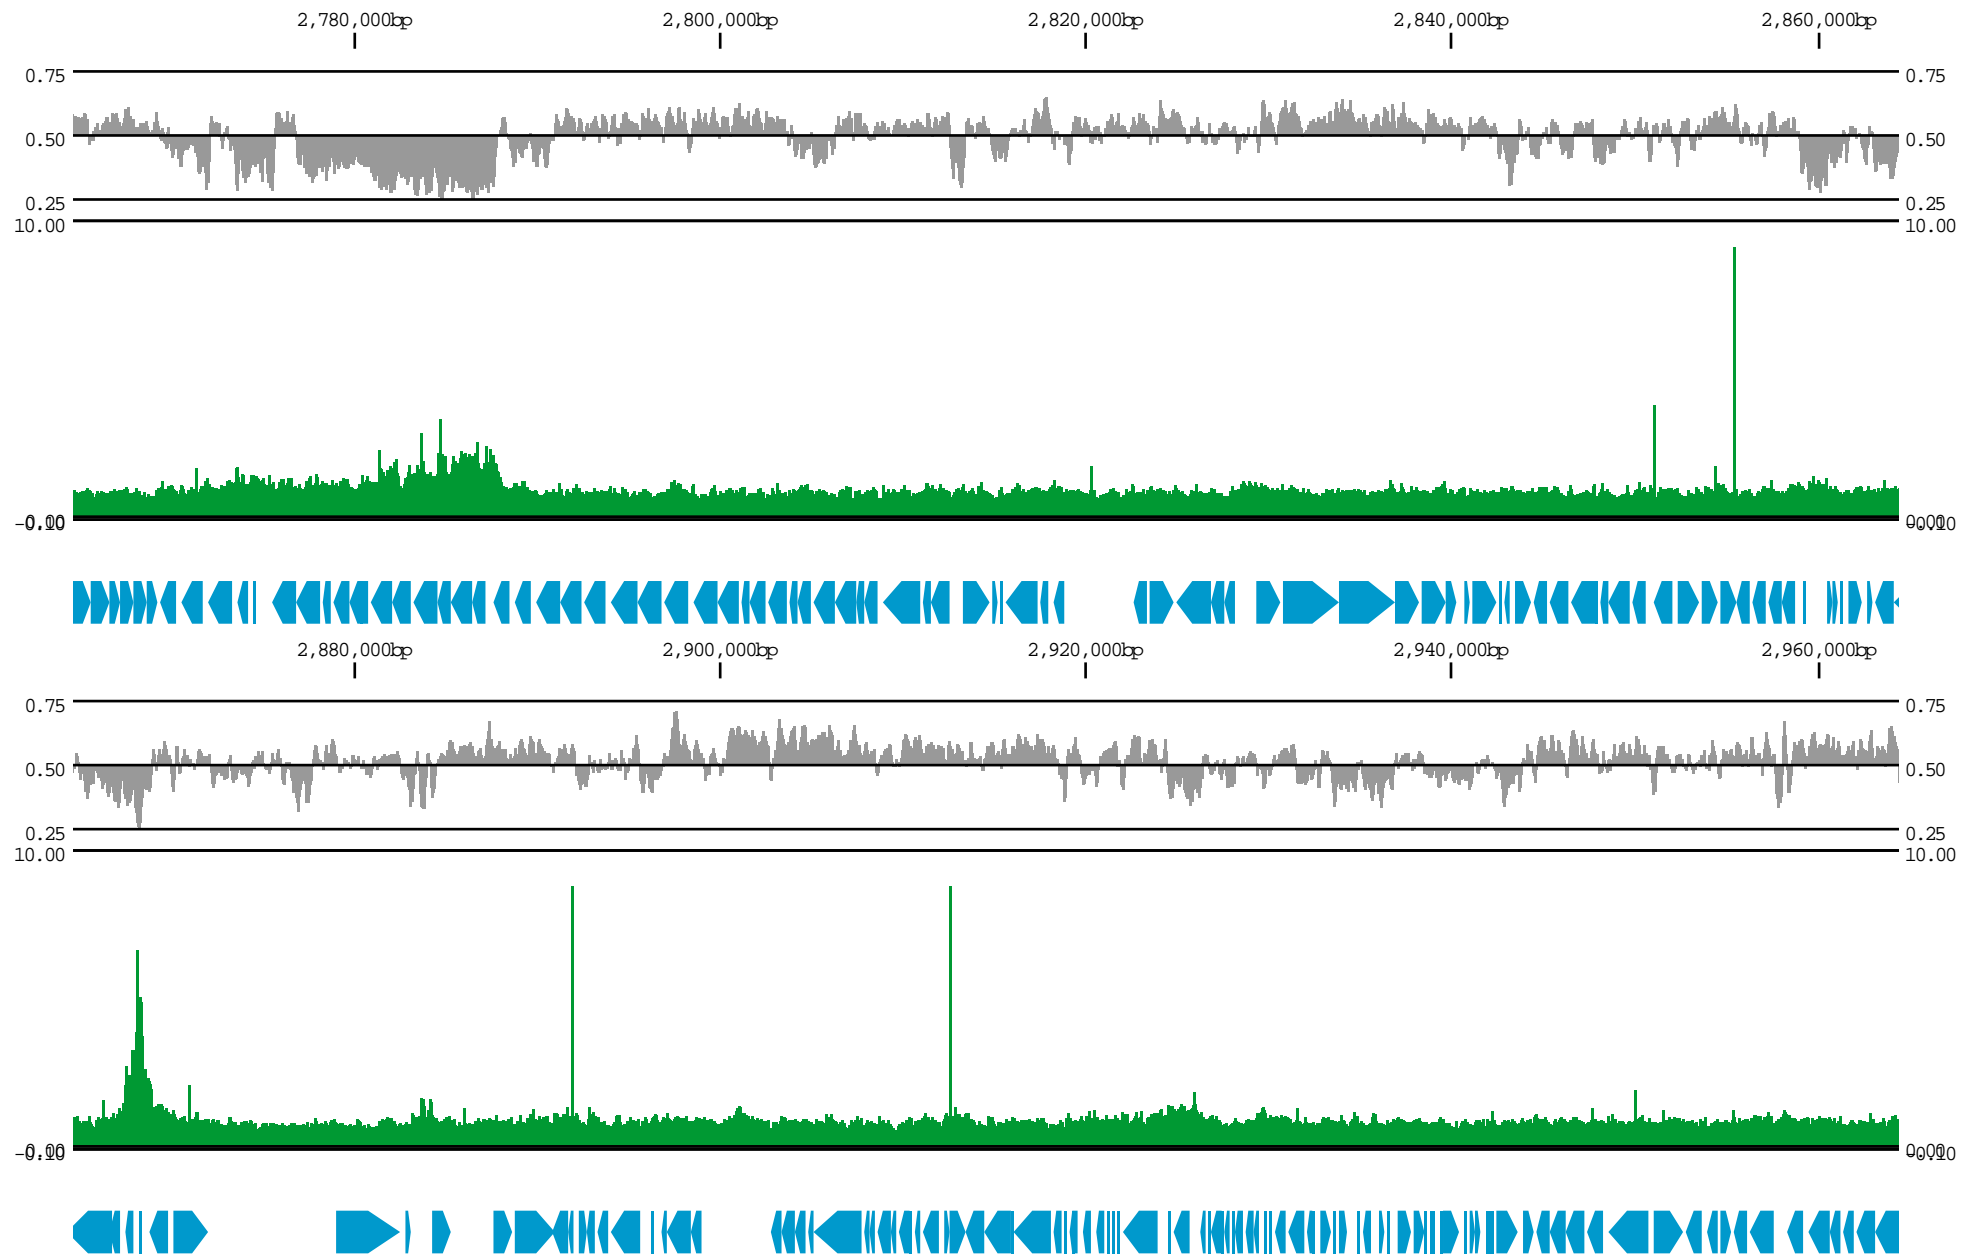



Fig. S1 (cont.)

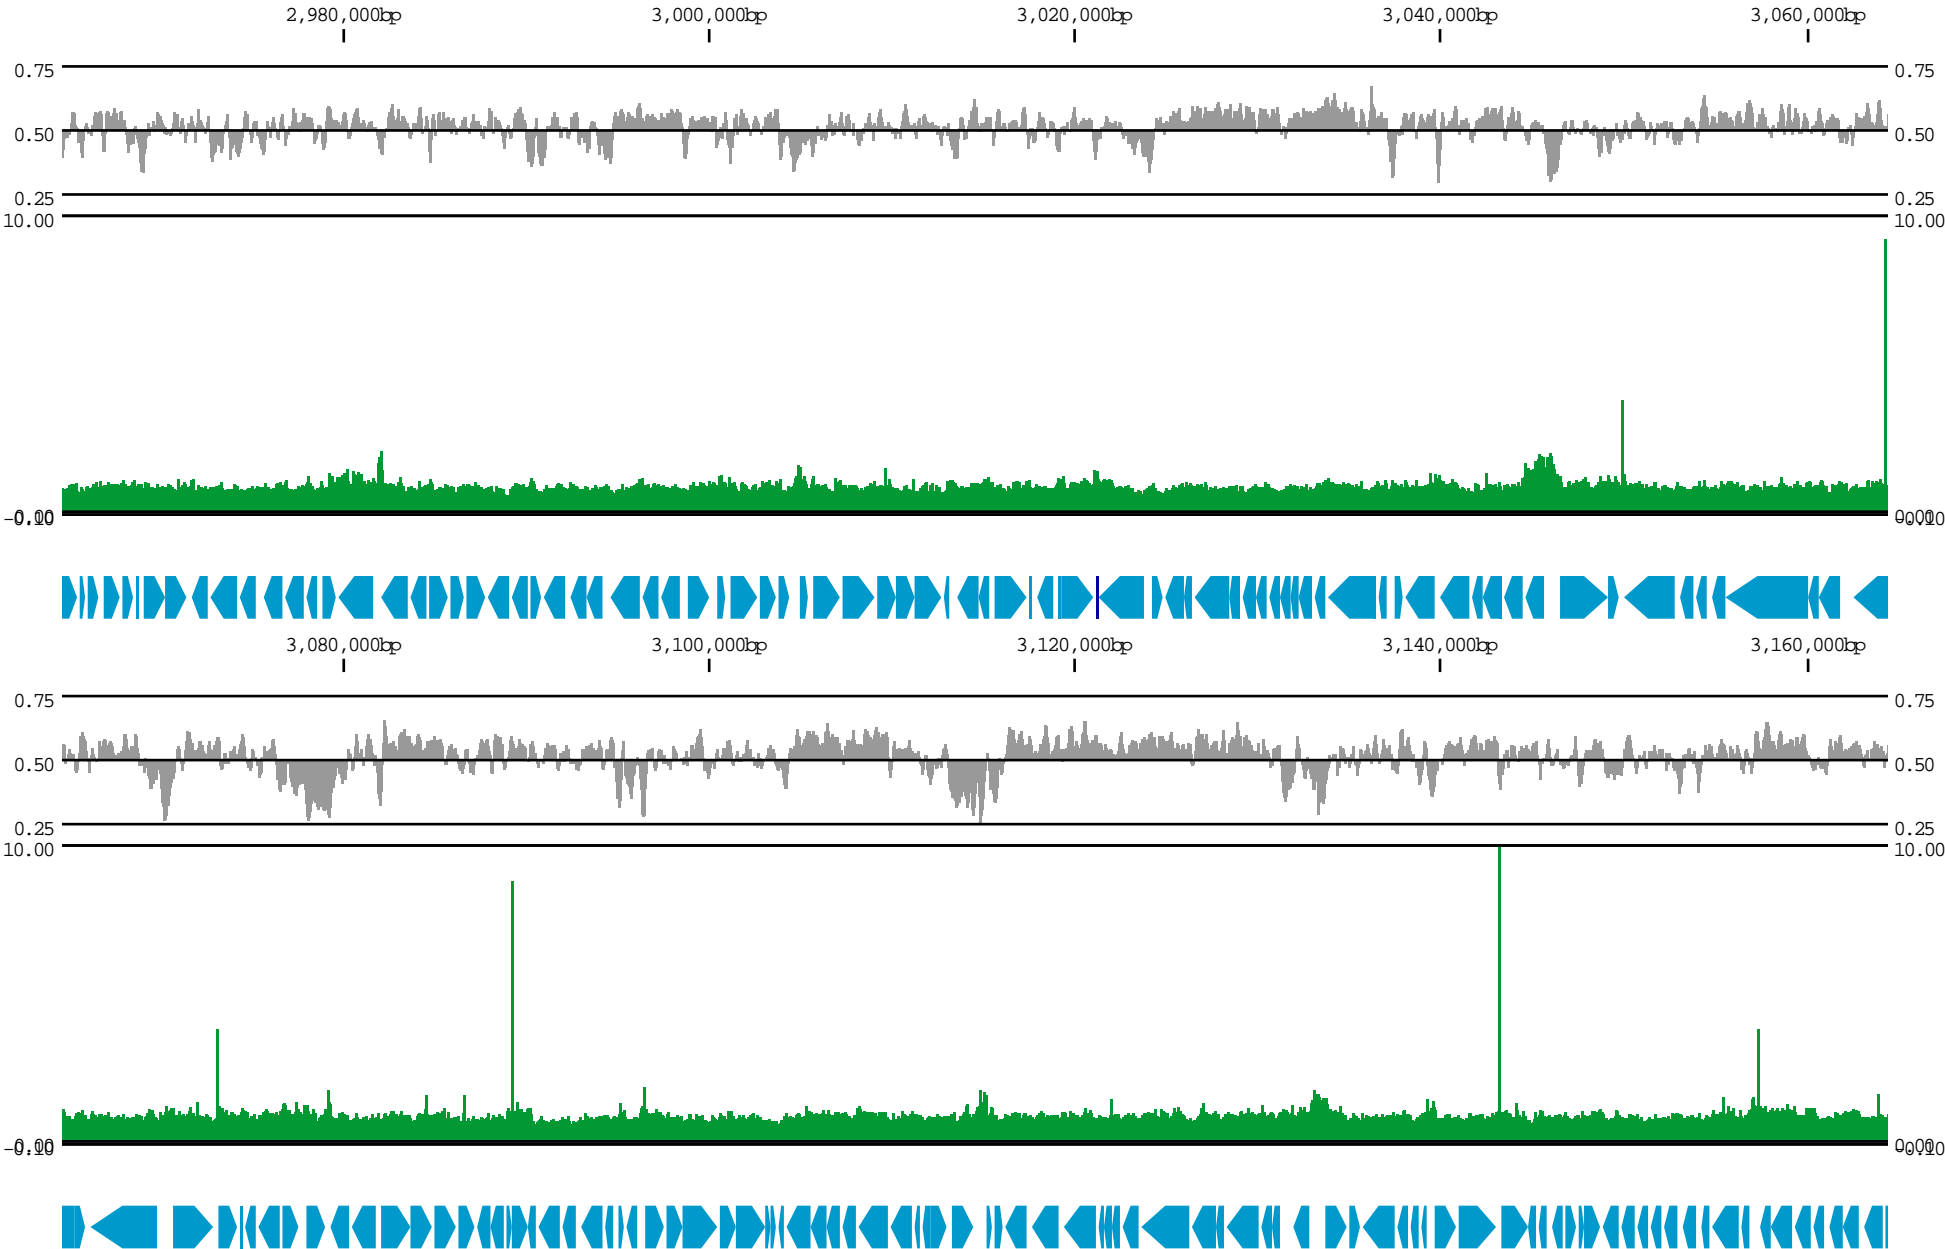

Fig. S1 (cont.)

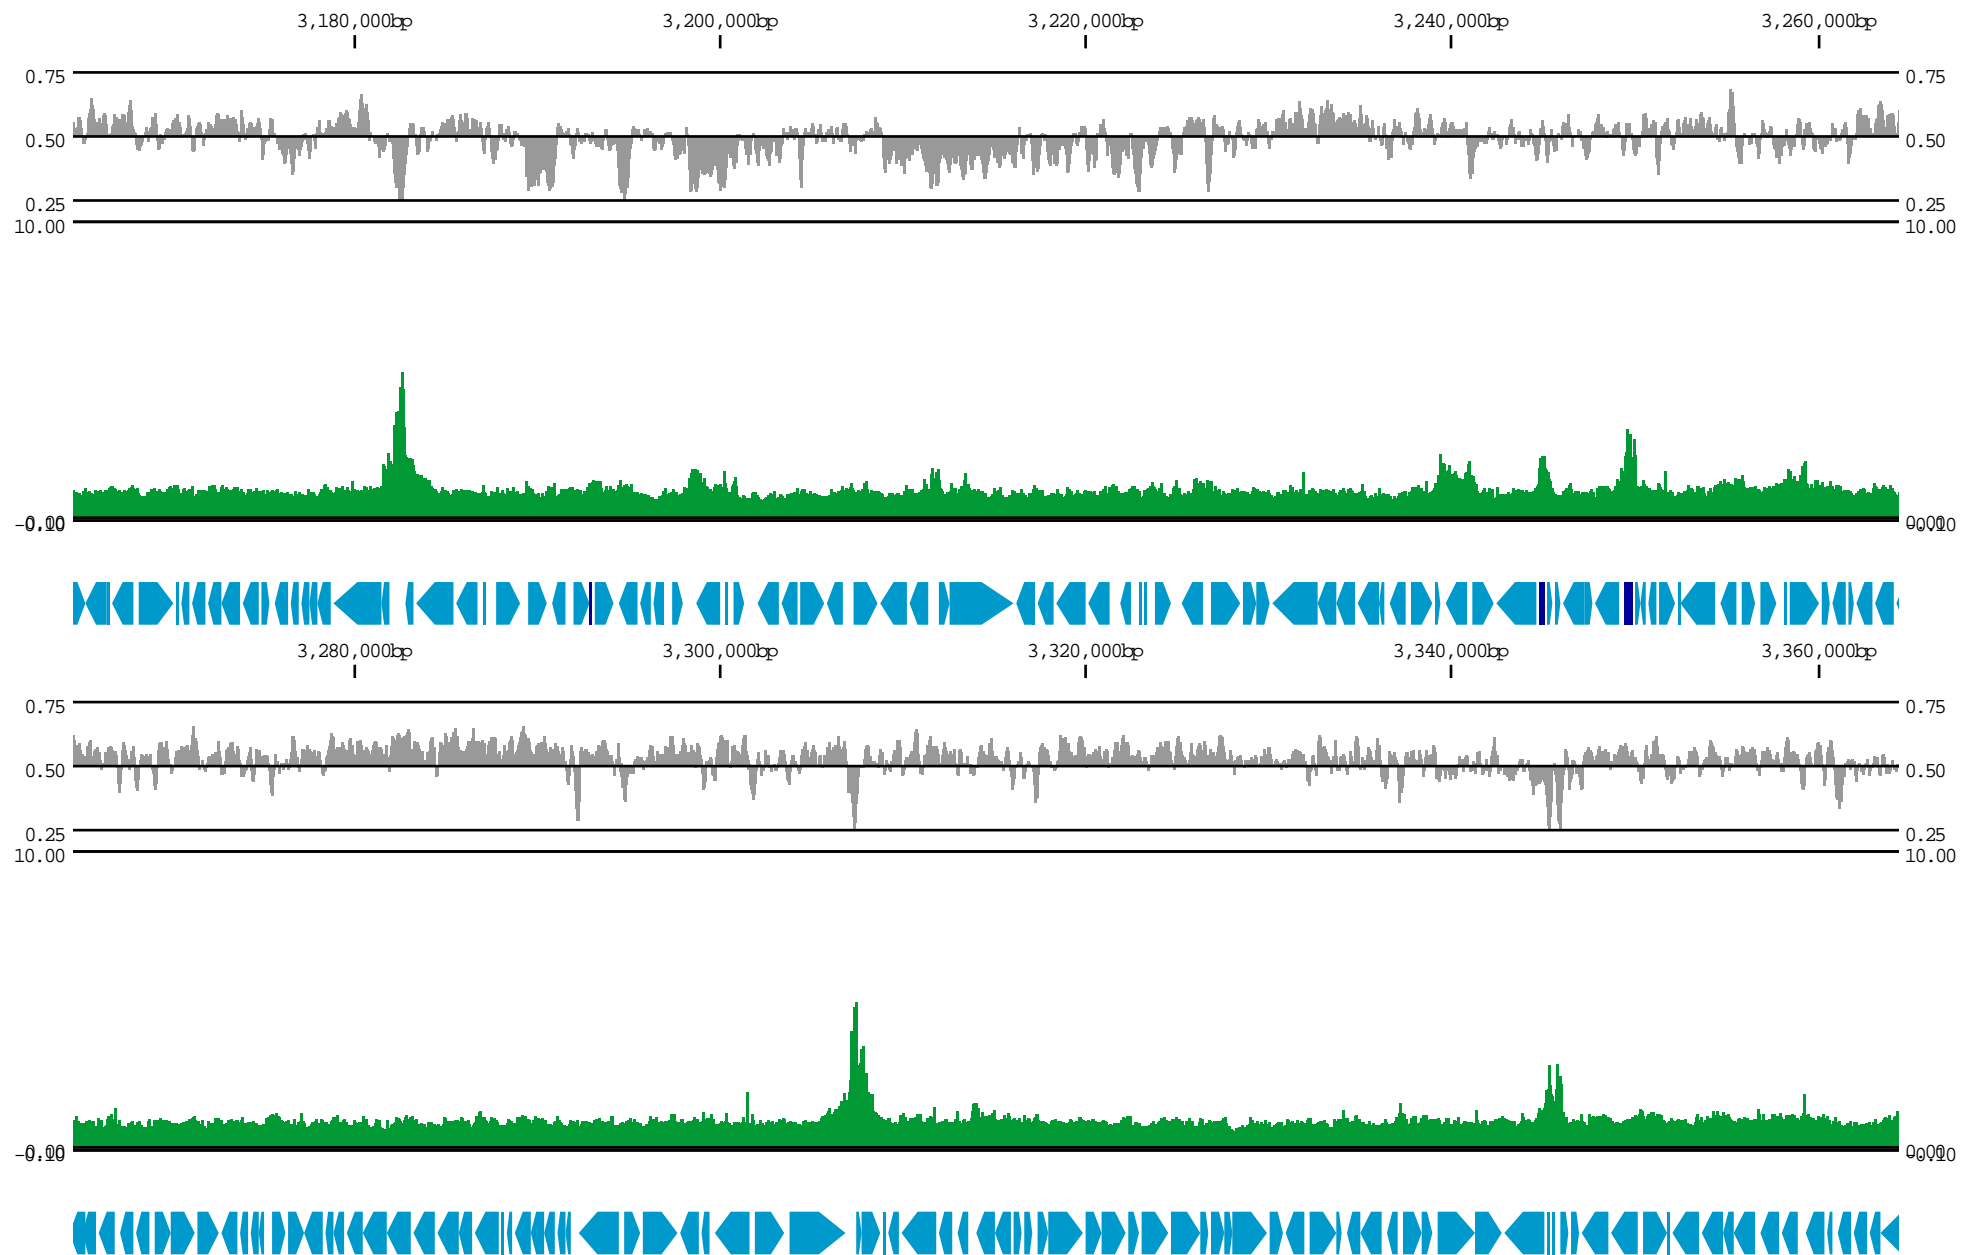

Fig. S1 (cont.)

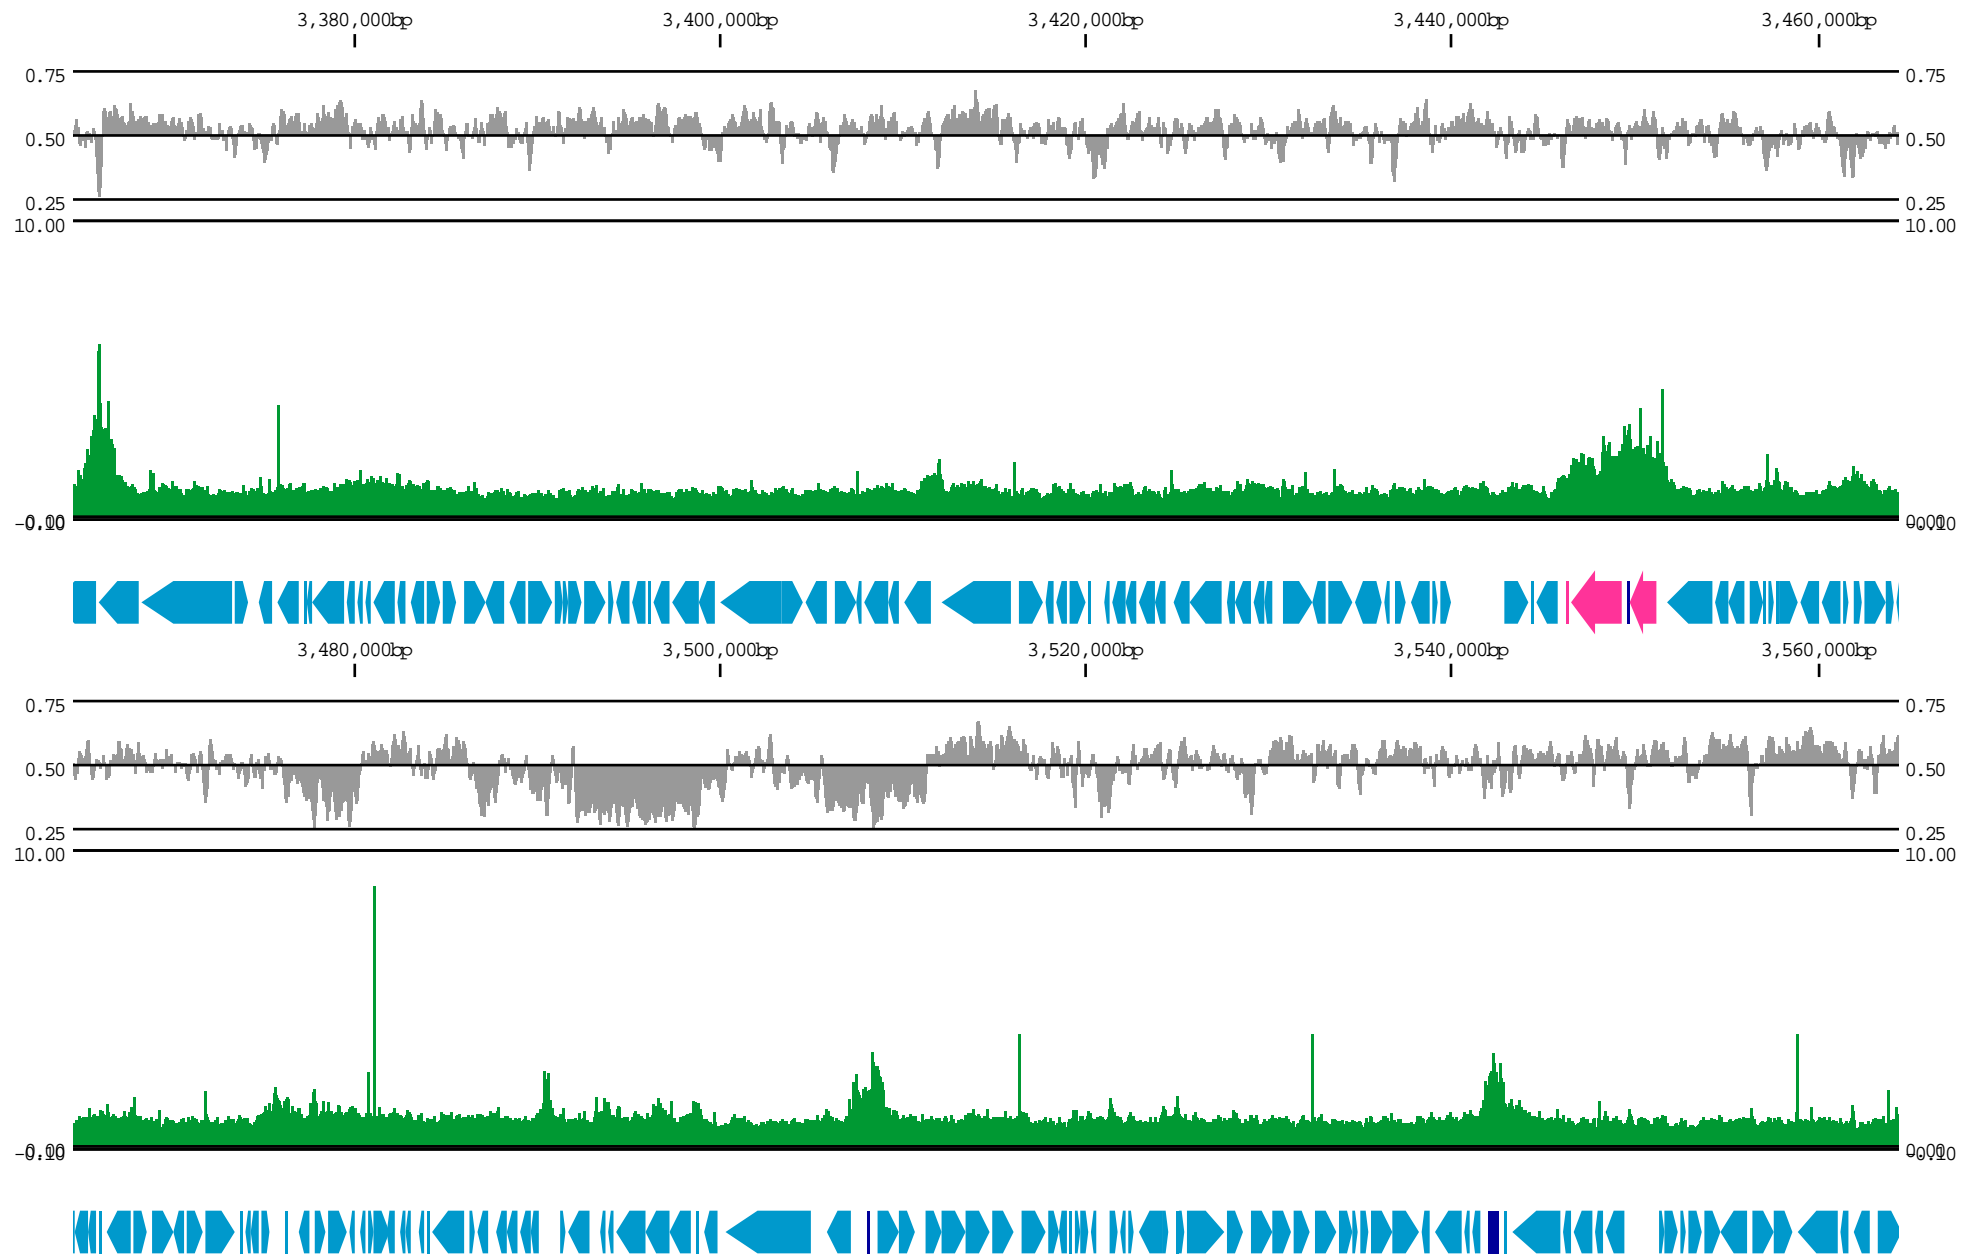

Fig. S1 (cont.)

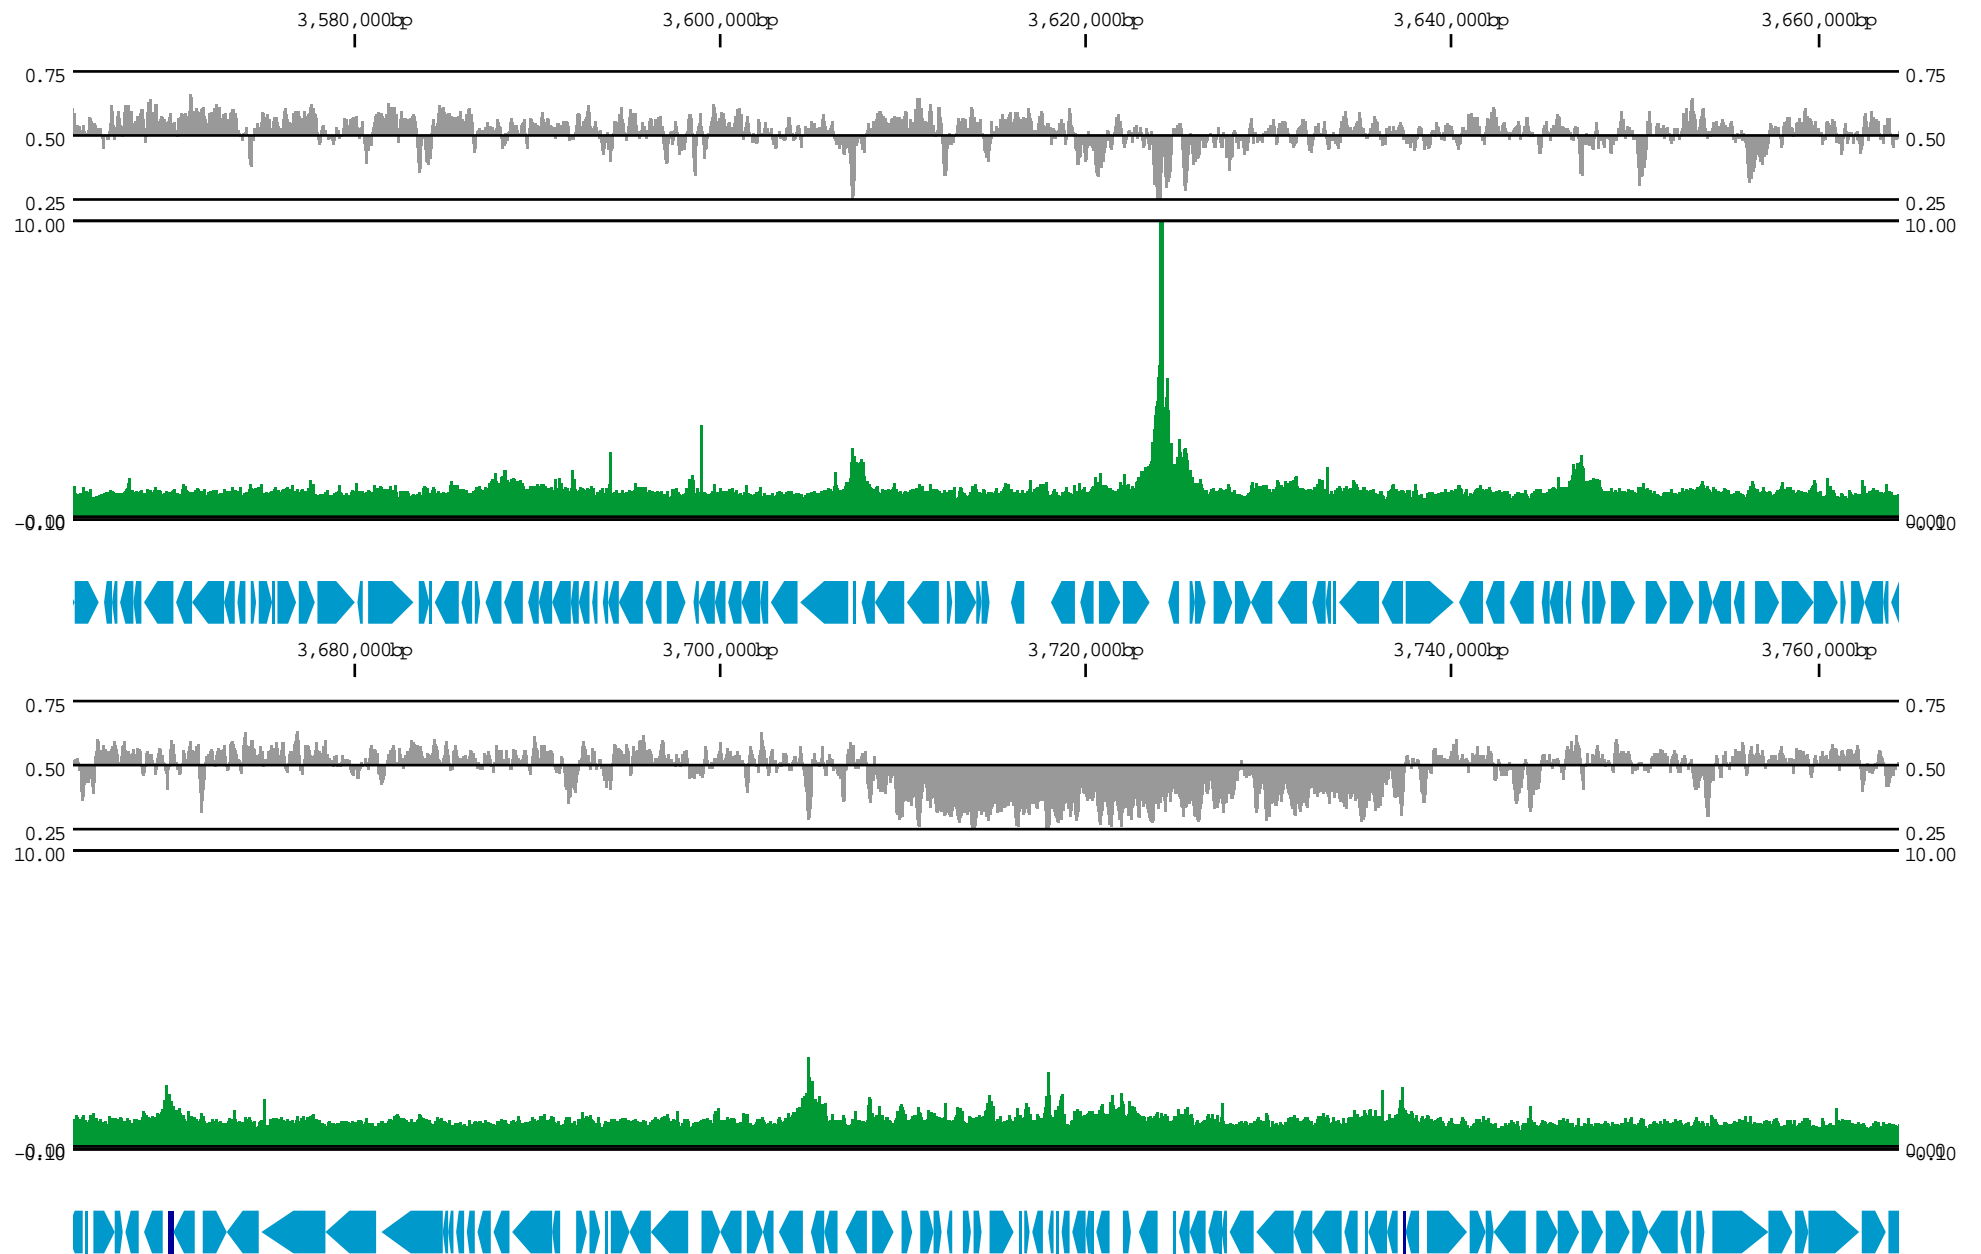

Fig. S1 (cont.)

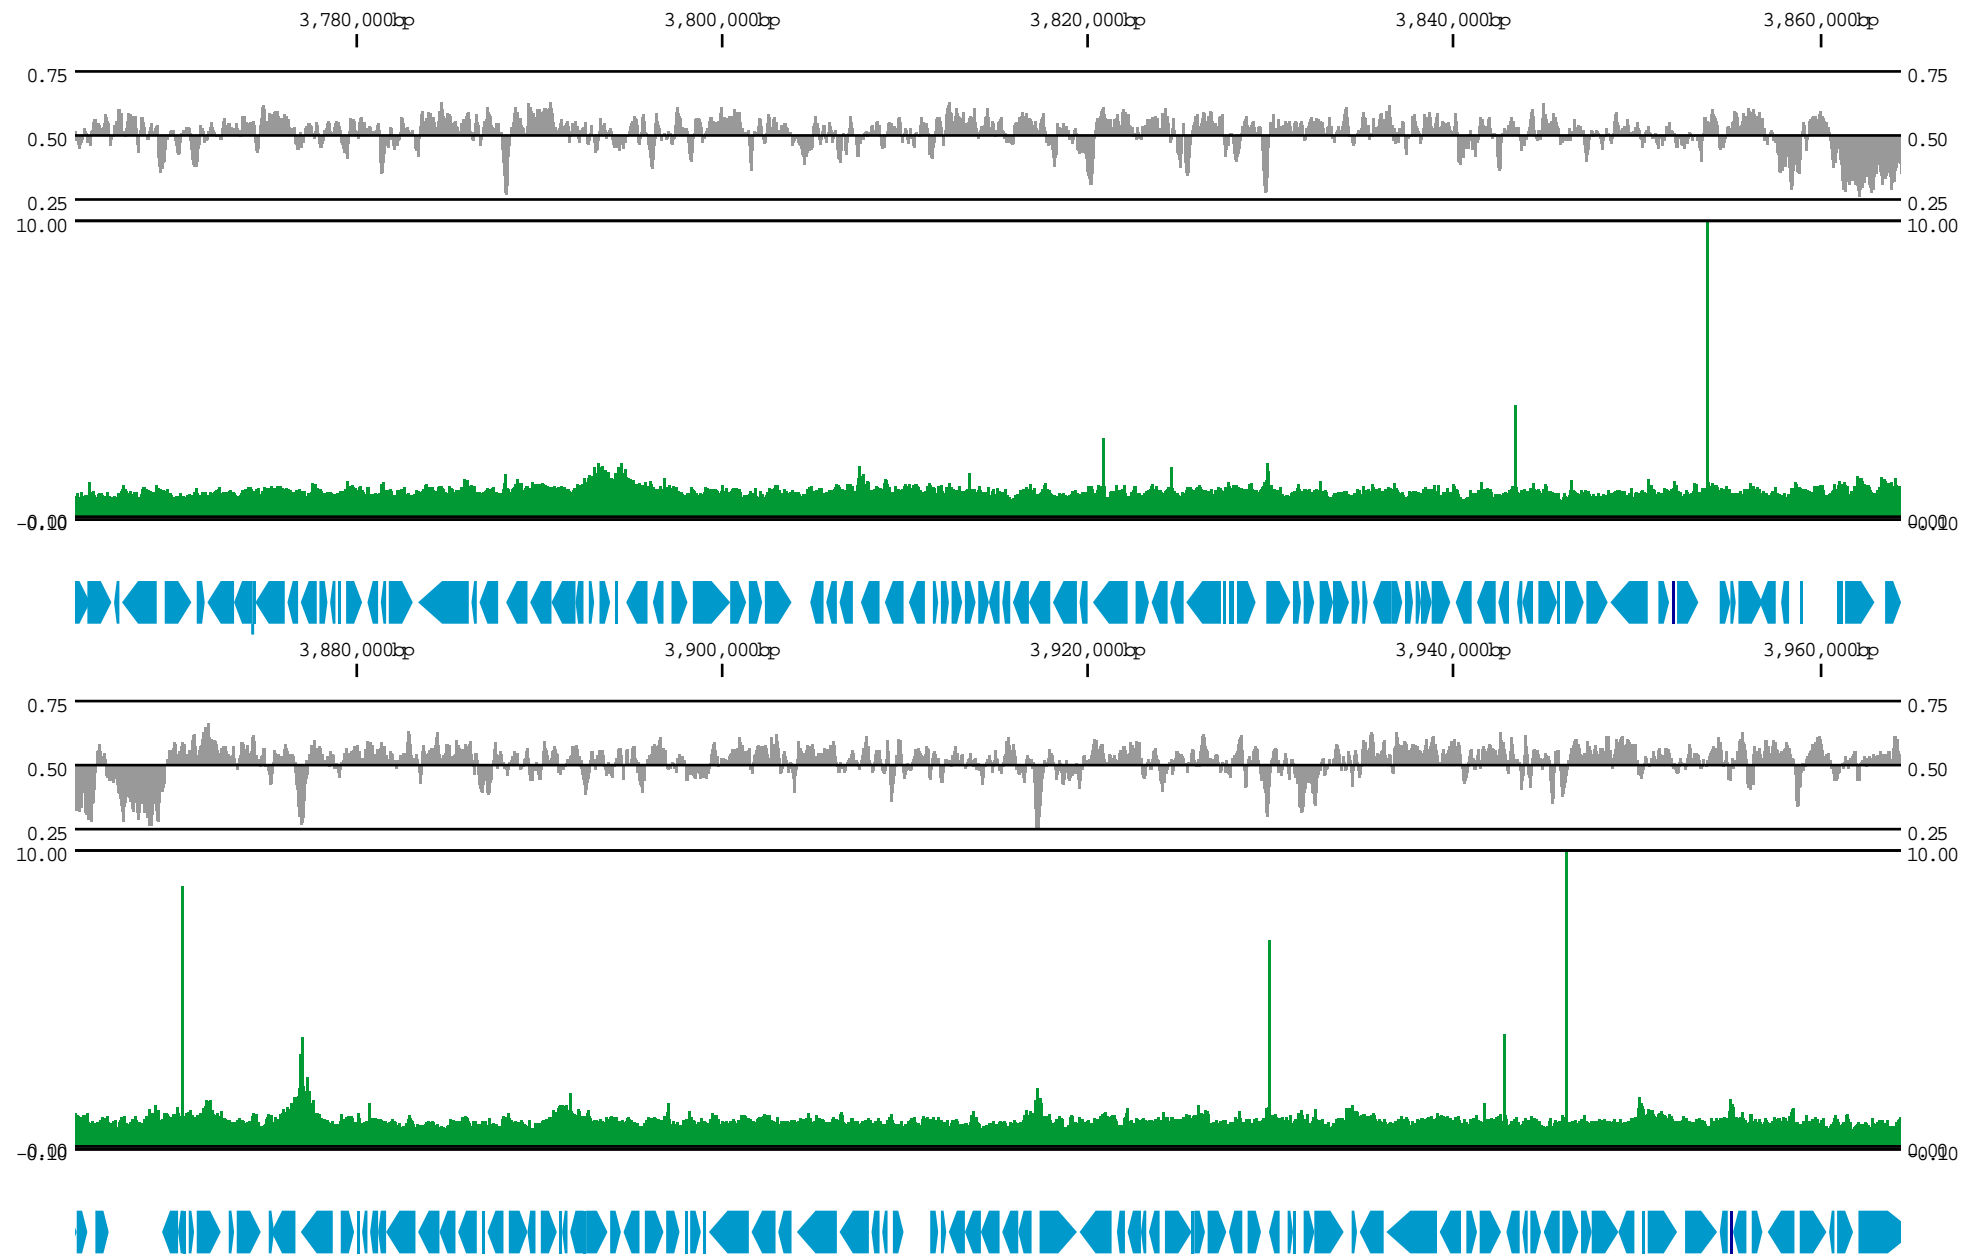

Fig. S1 (cont.)

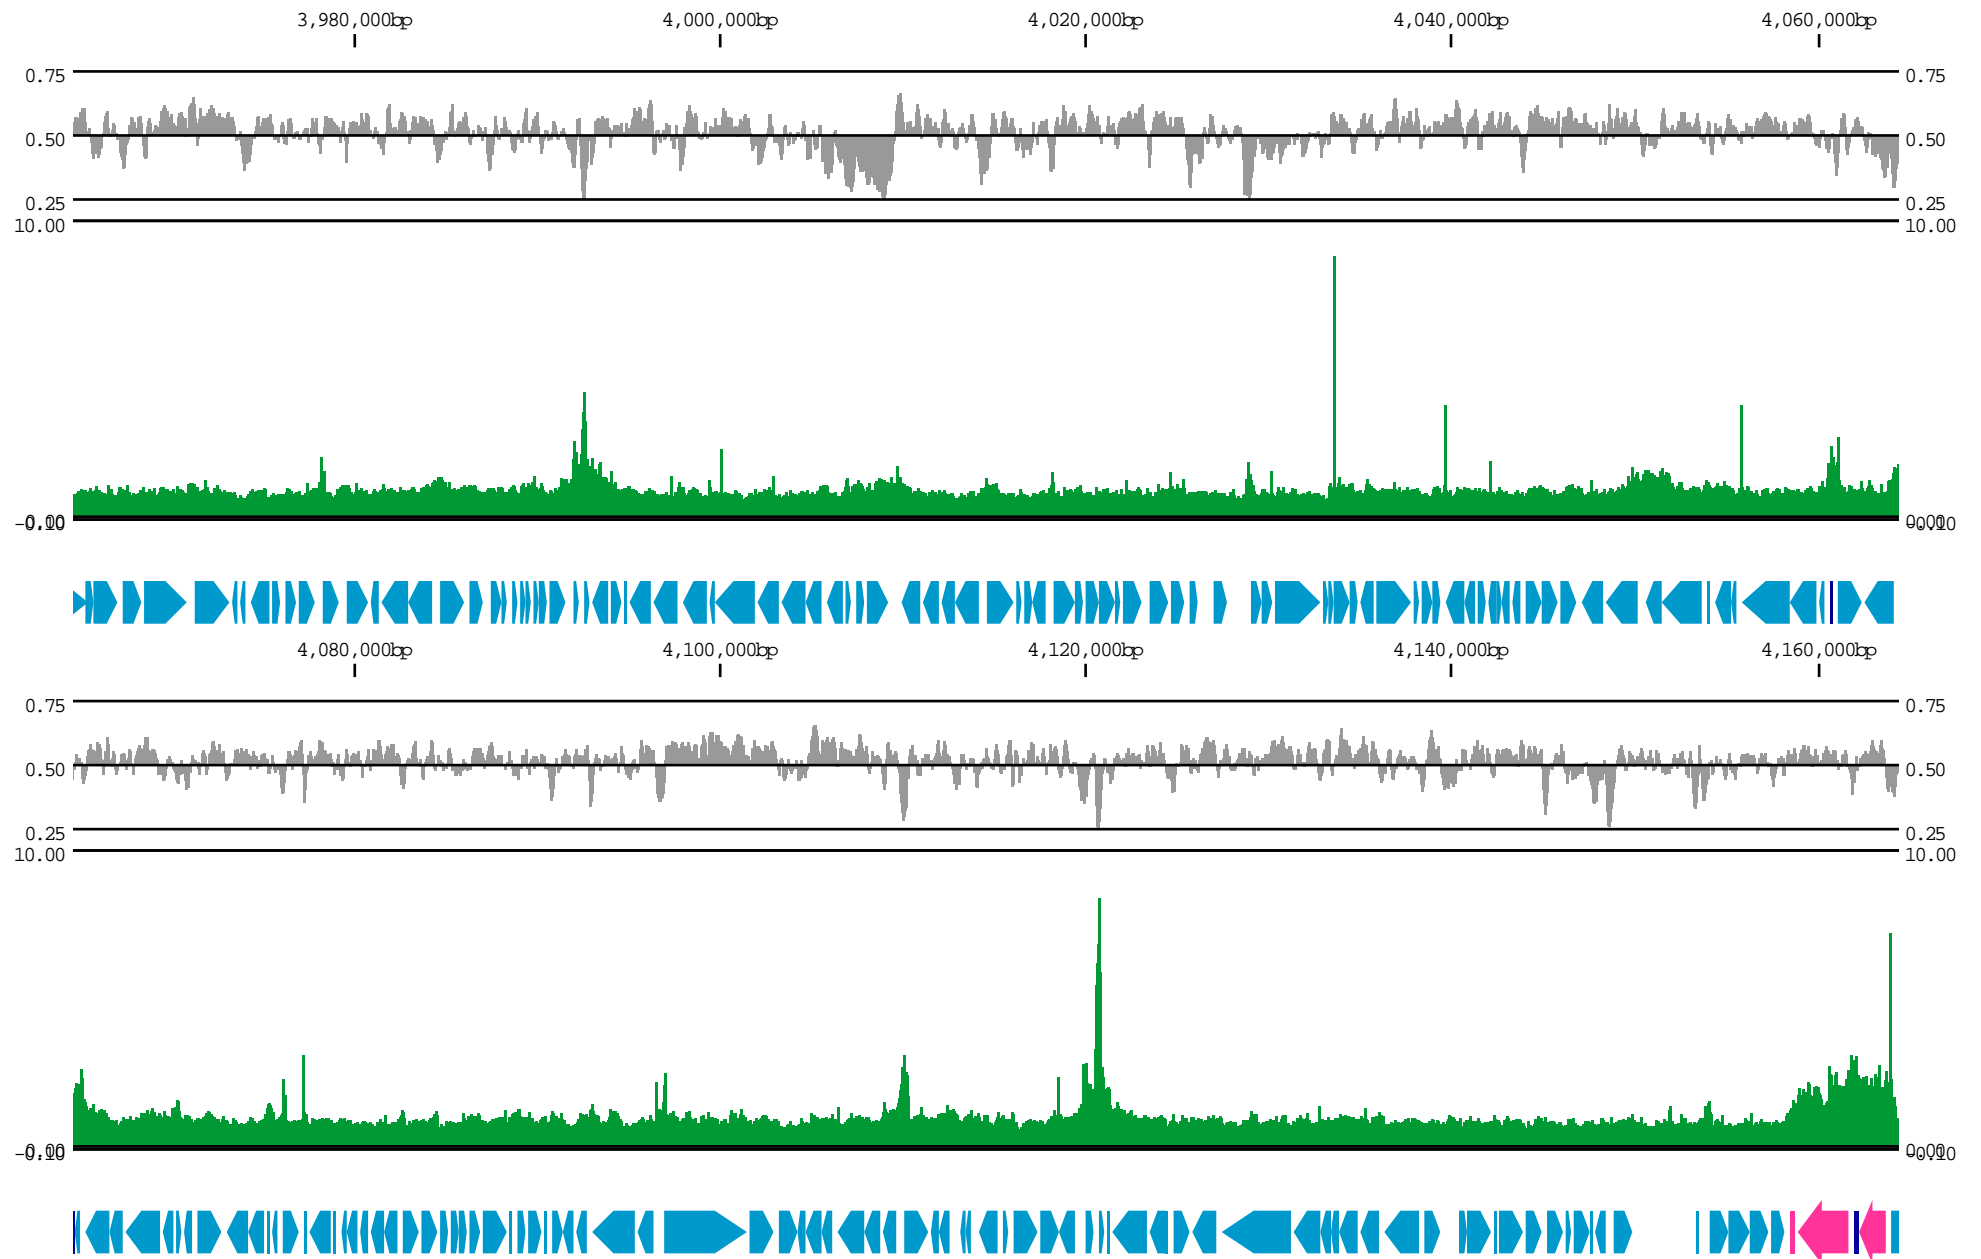

Fig. S1 (cont.)

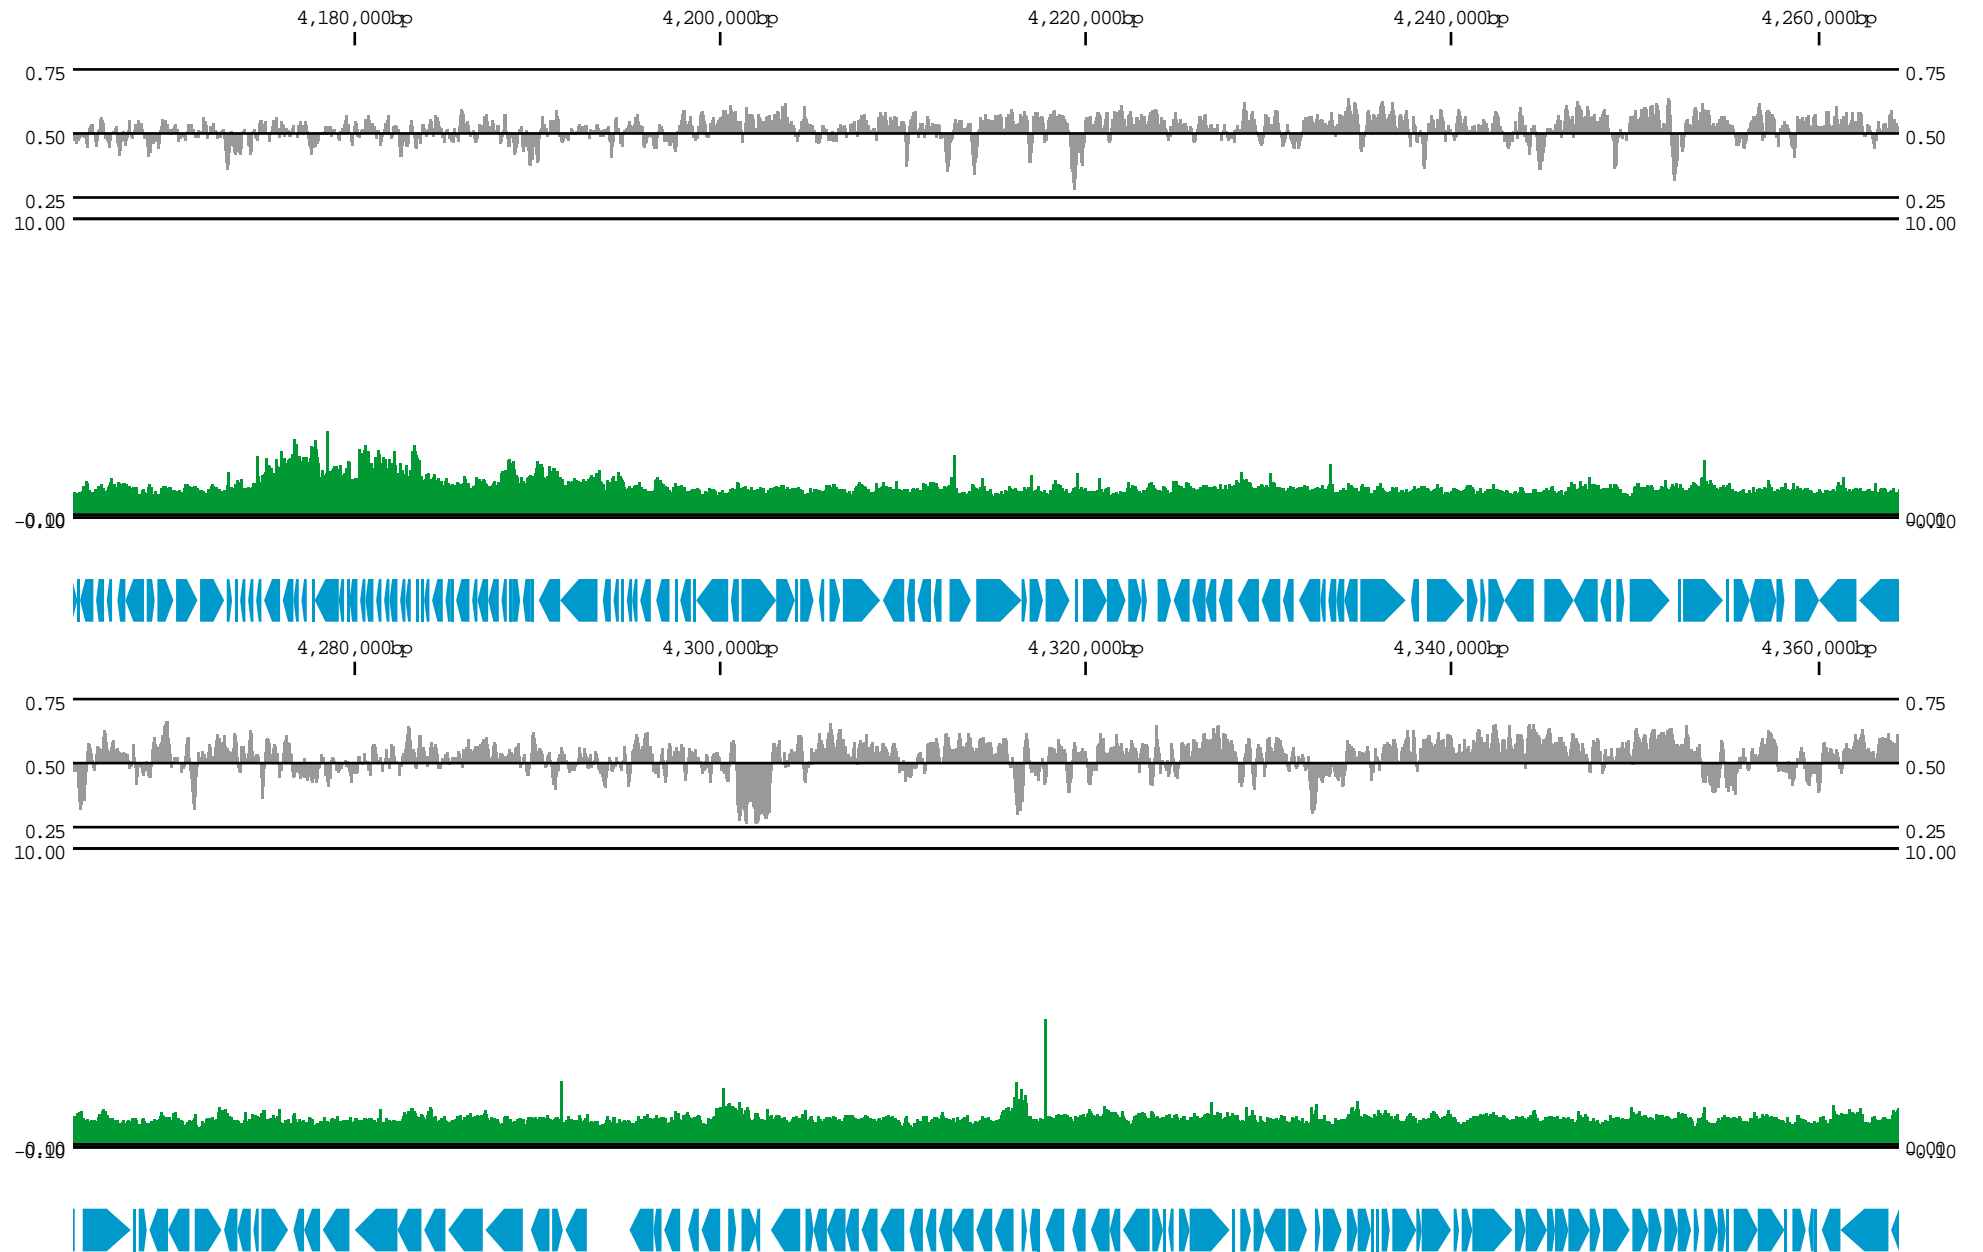

Fig. S1 (cont.)

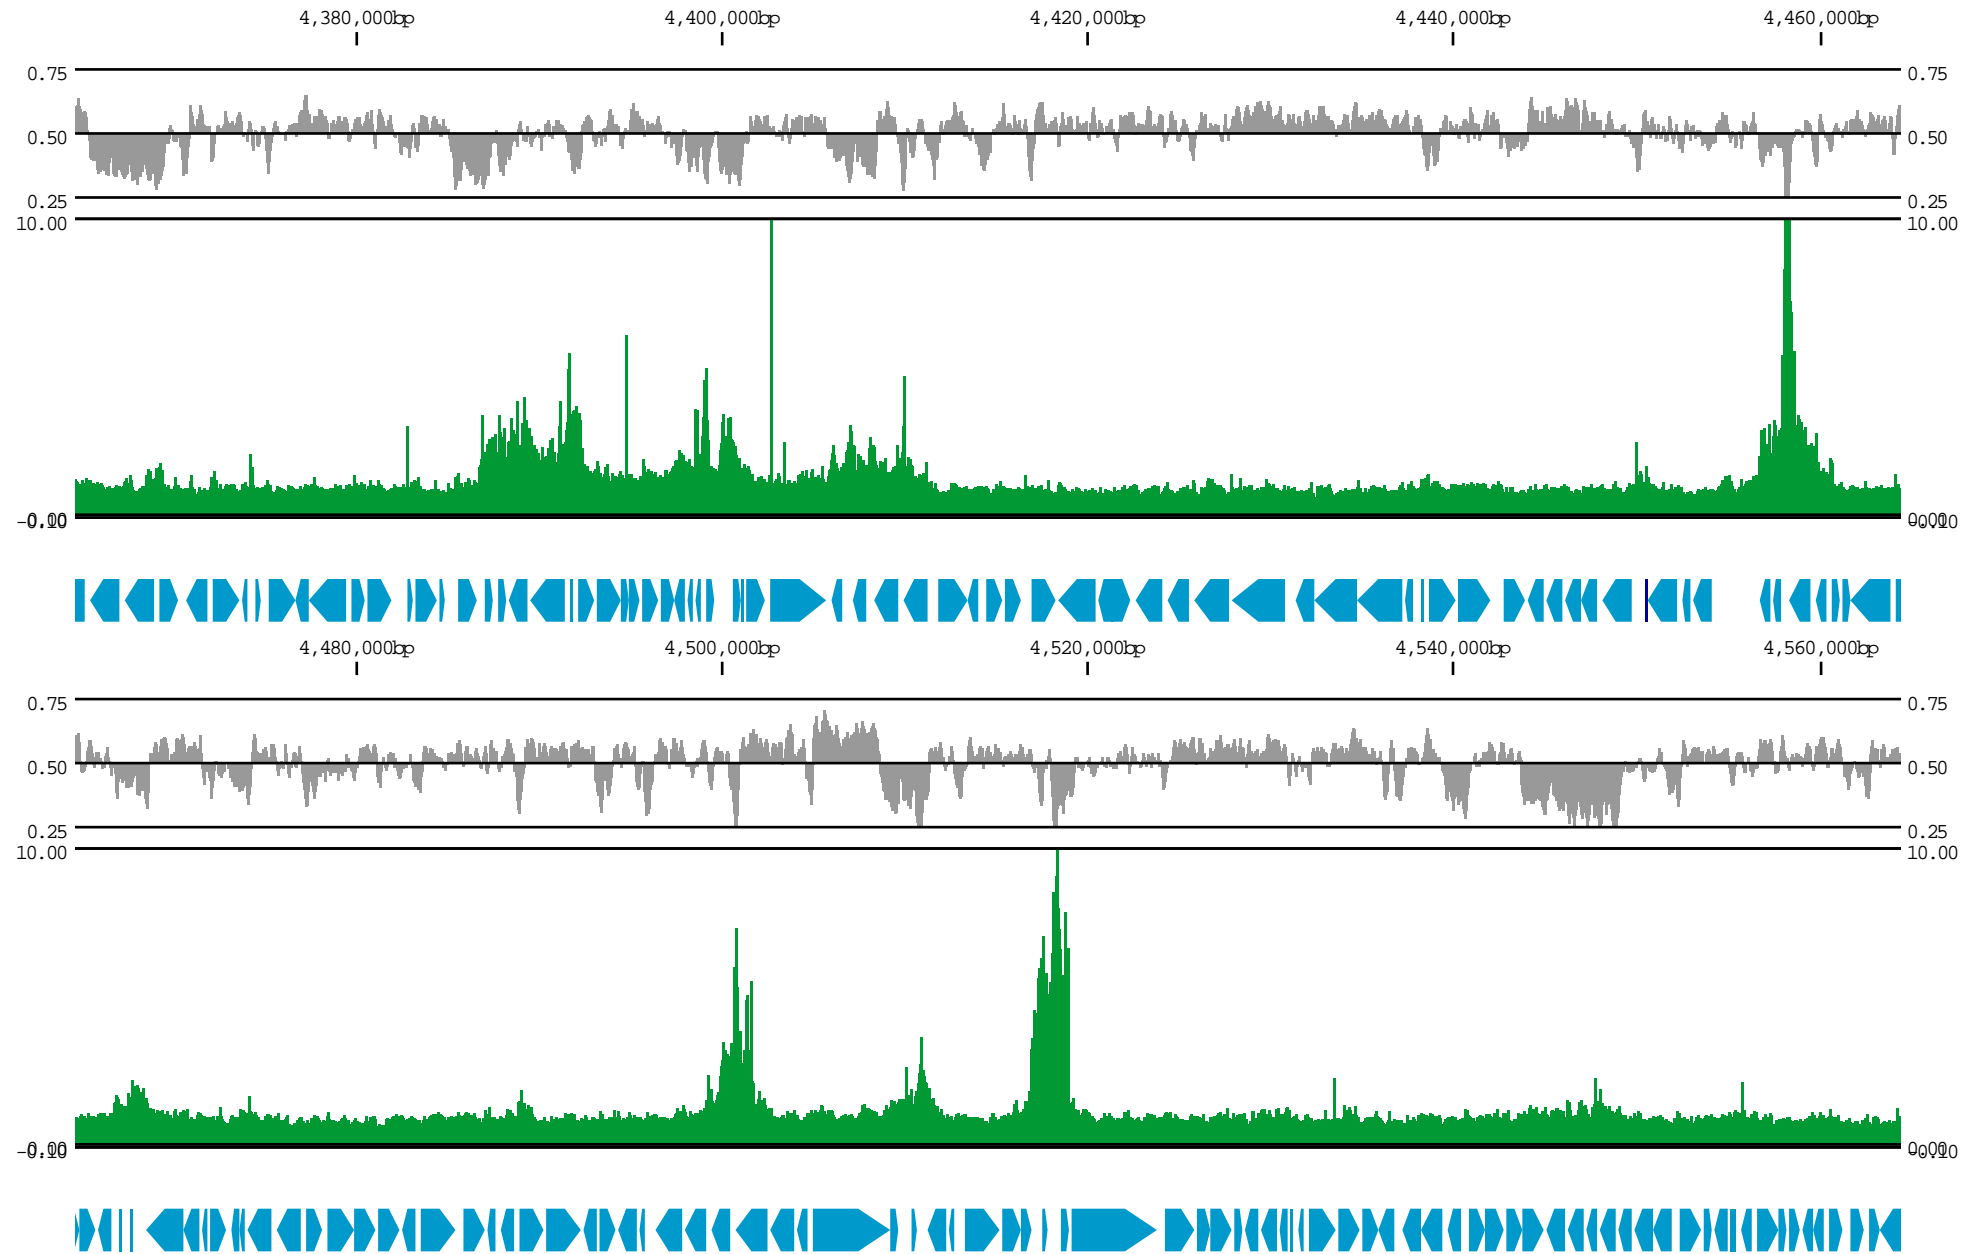



Fig. S1 (cont.)

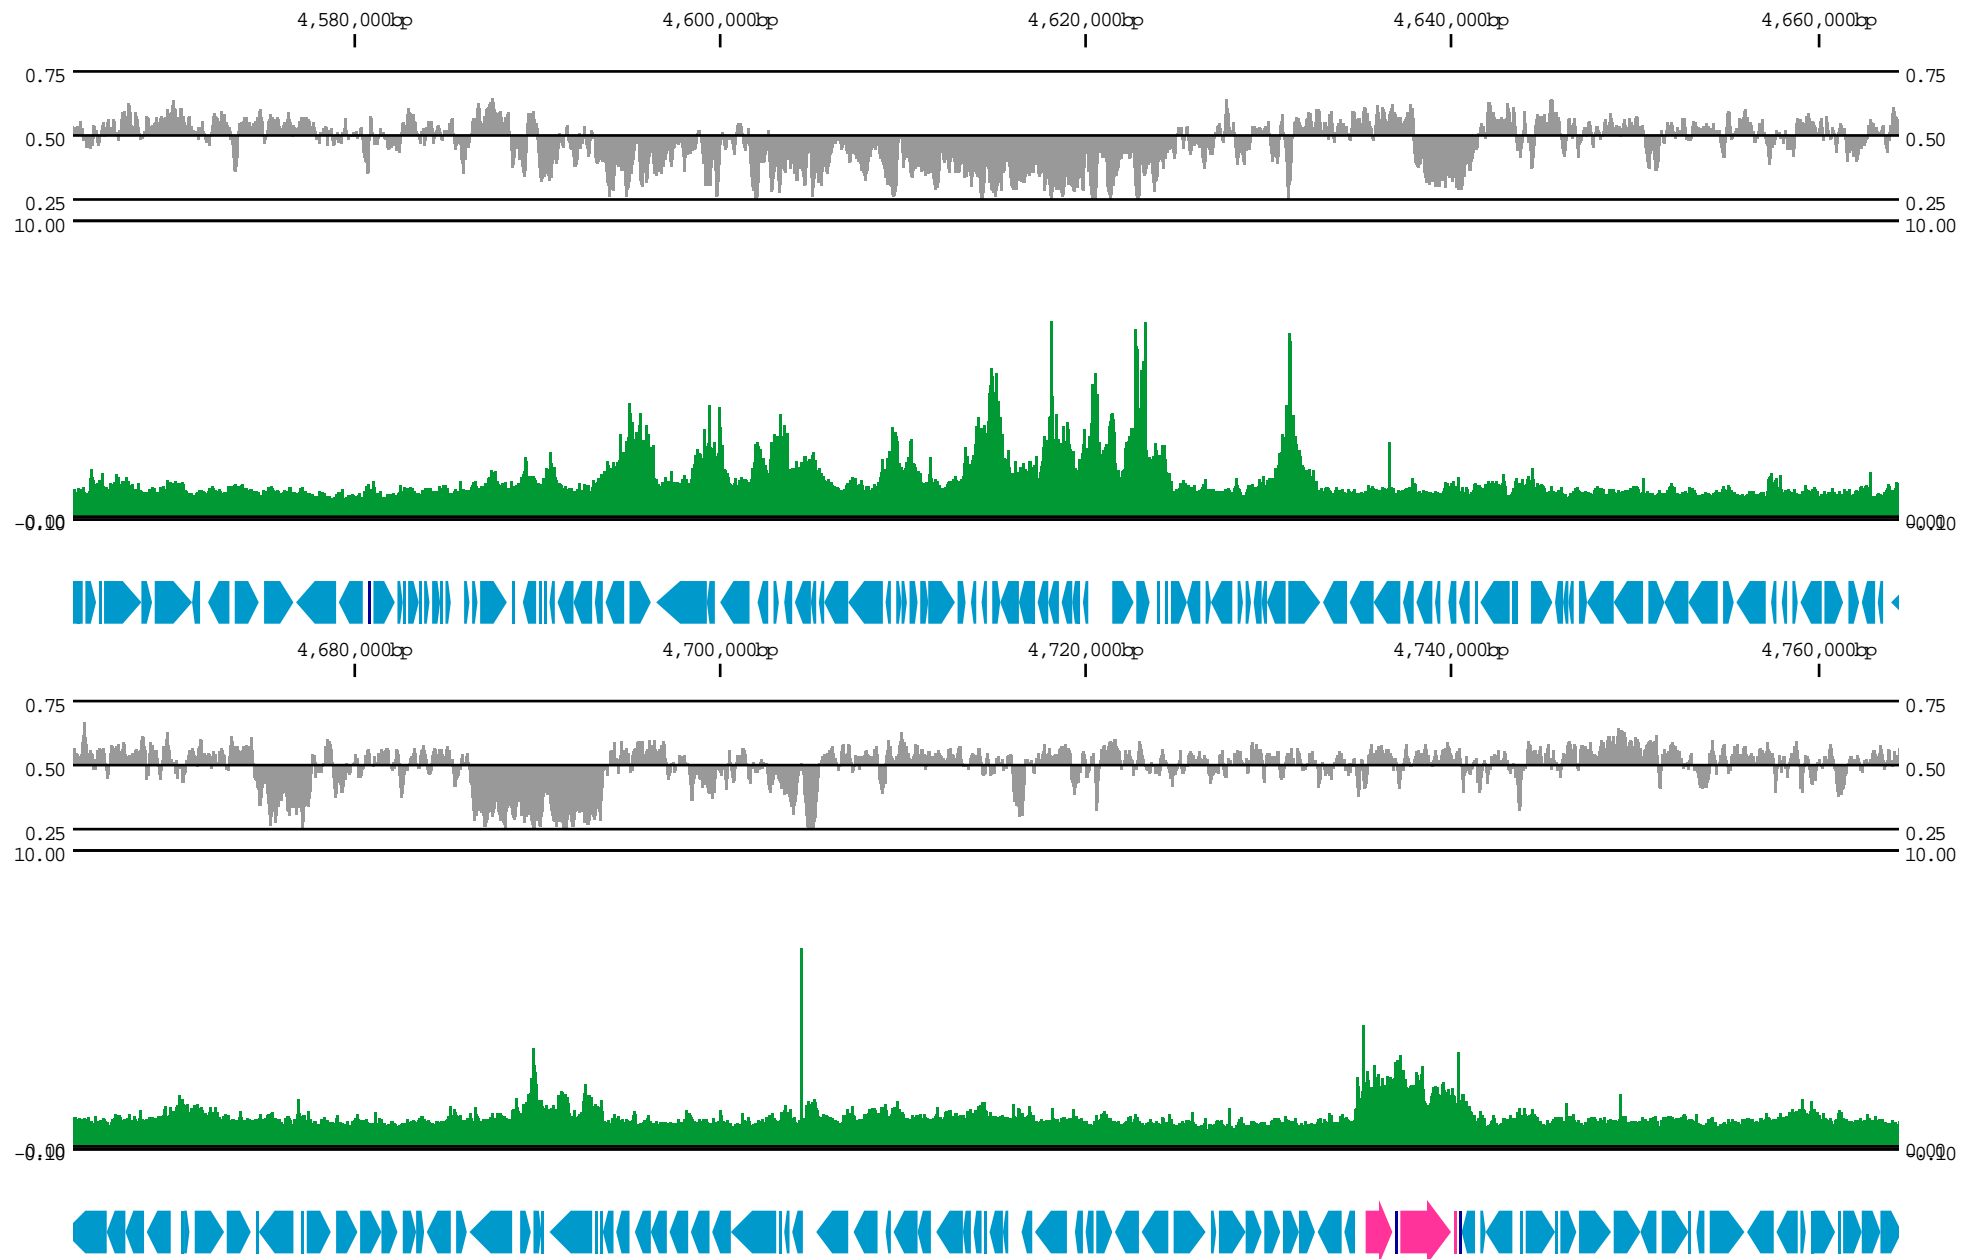

Fig. S1 (cont.)

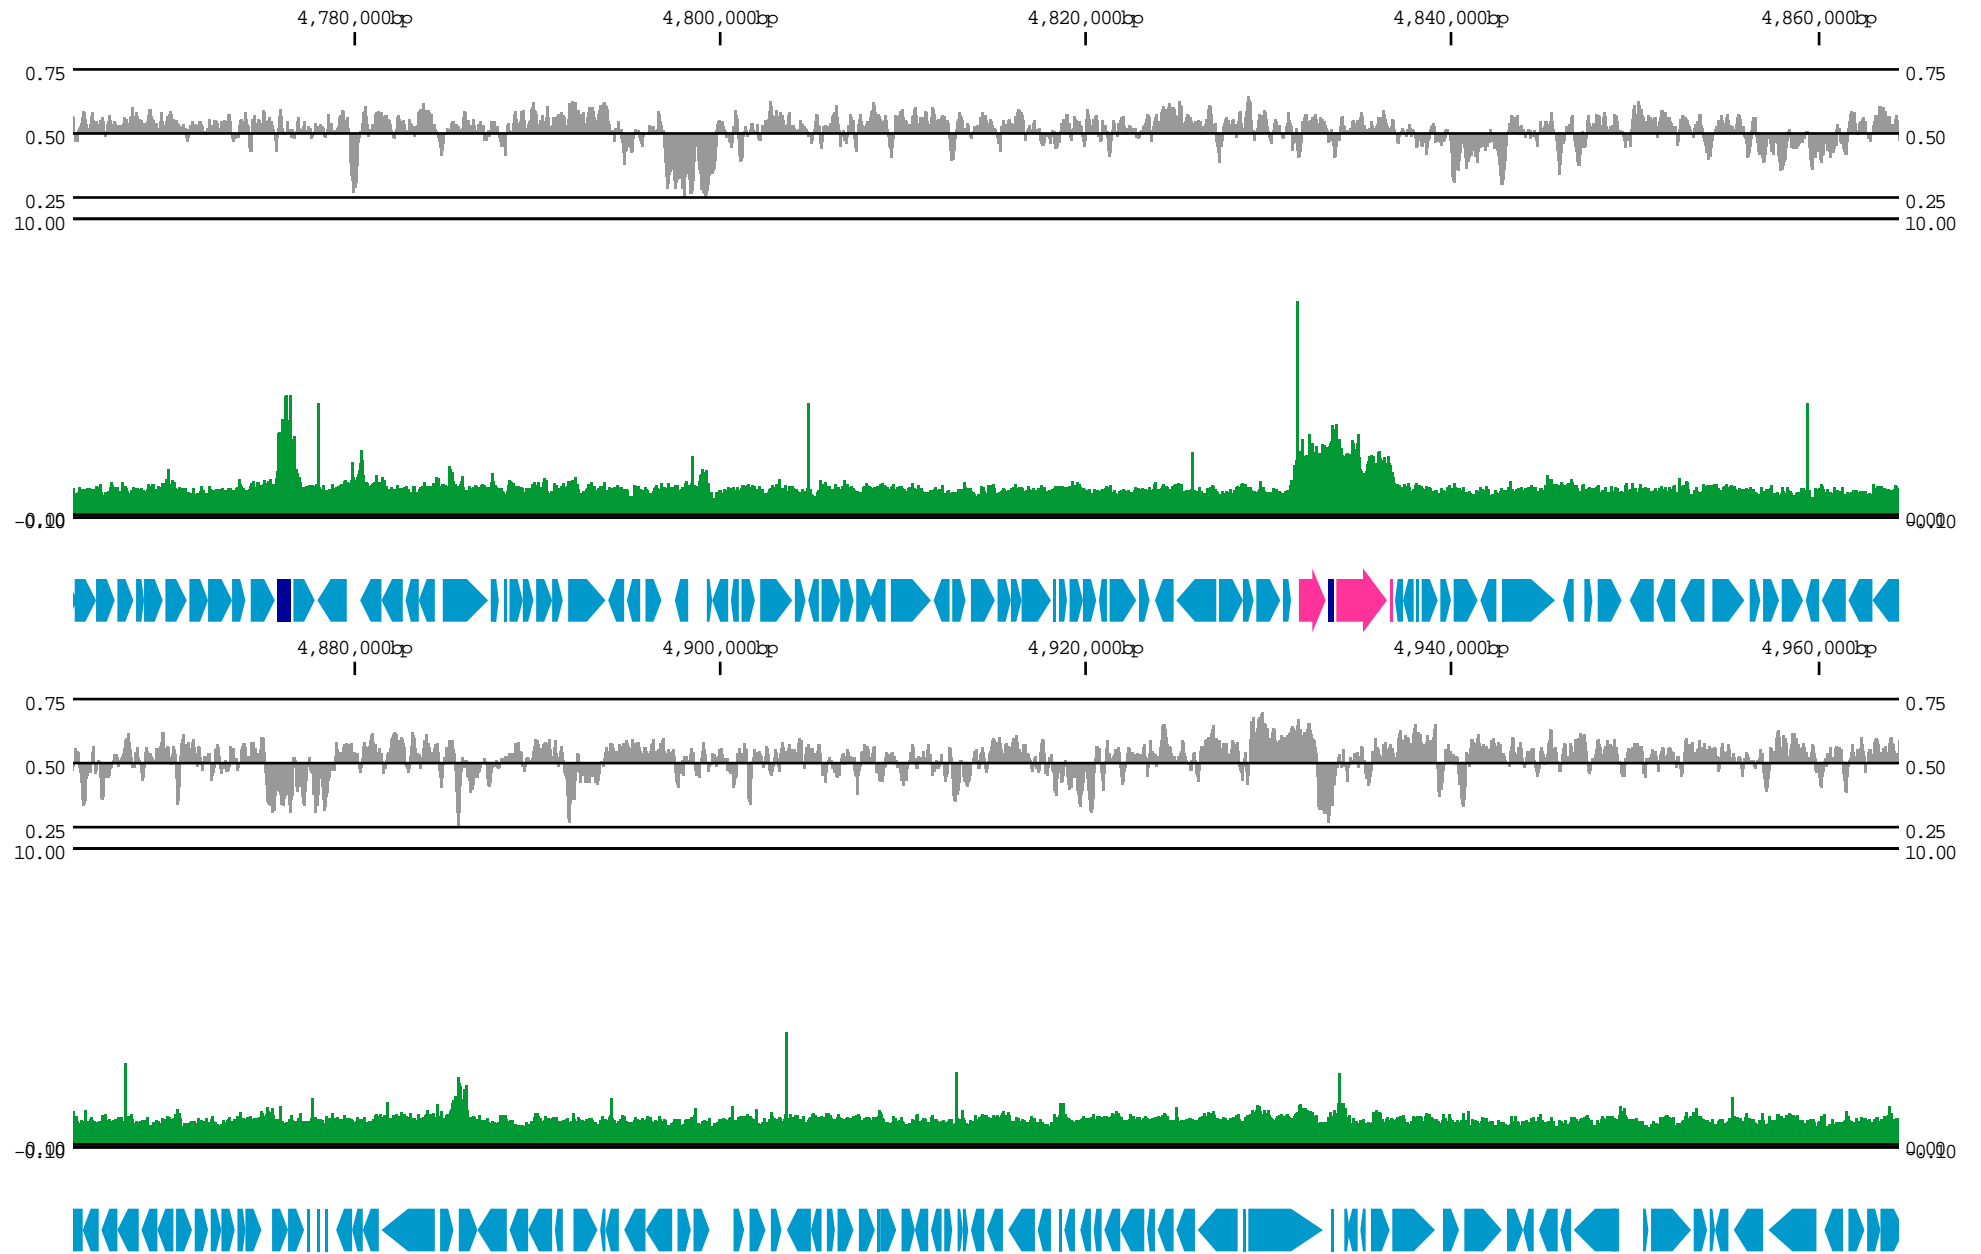

Fig. S1 (cont.)

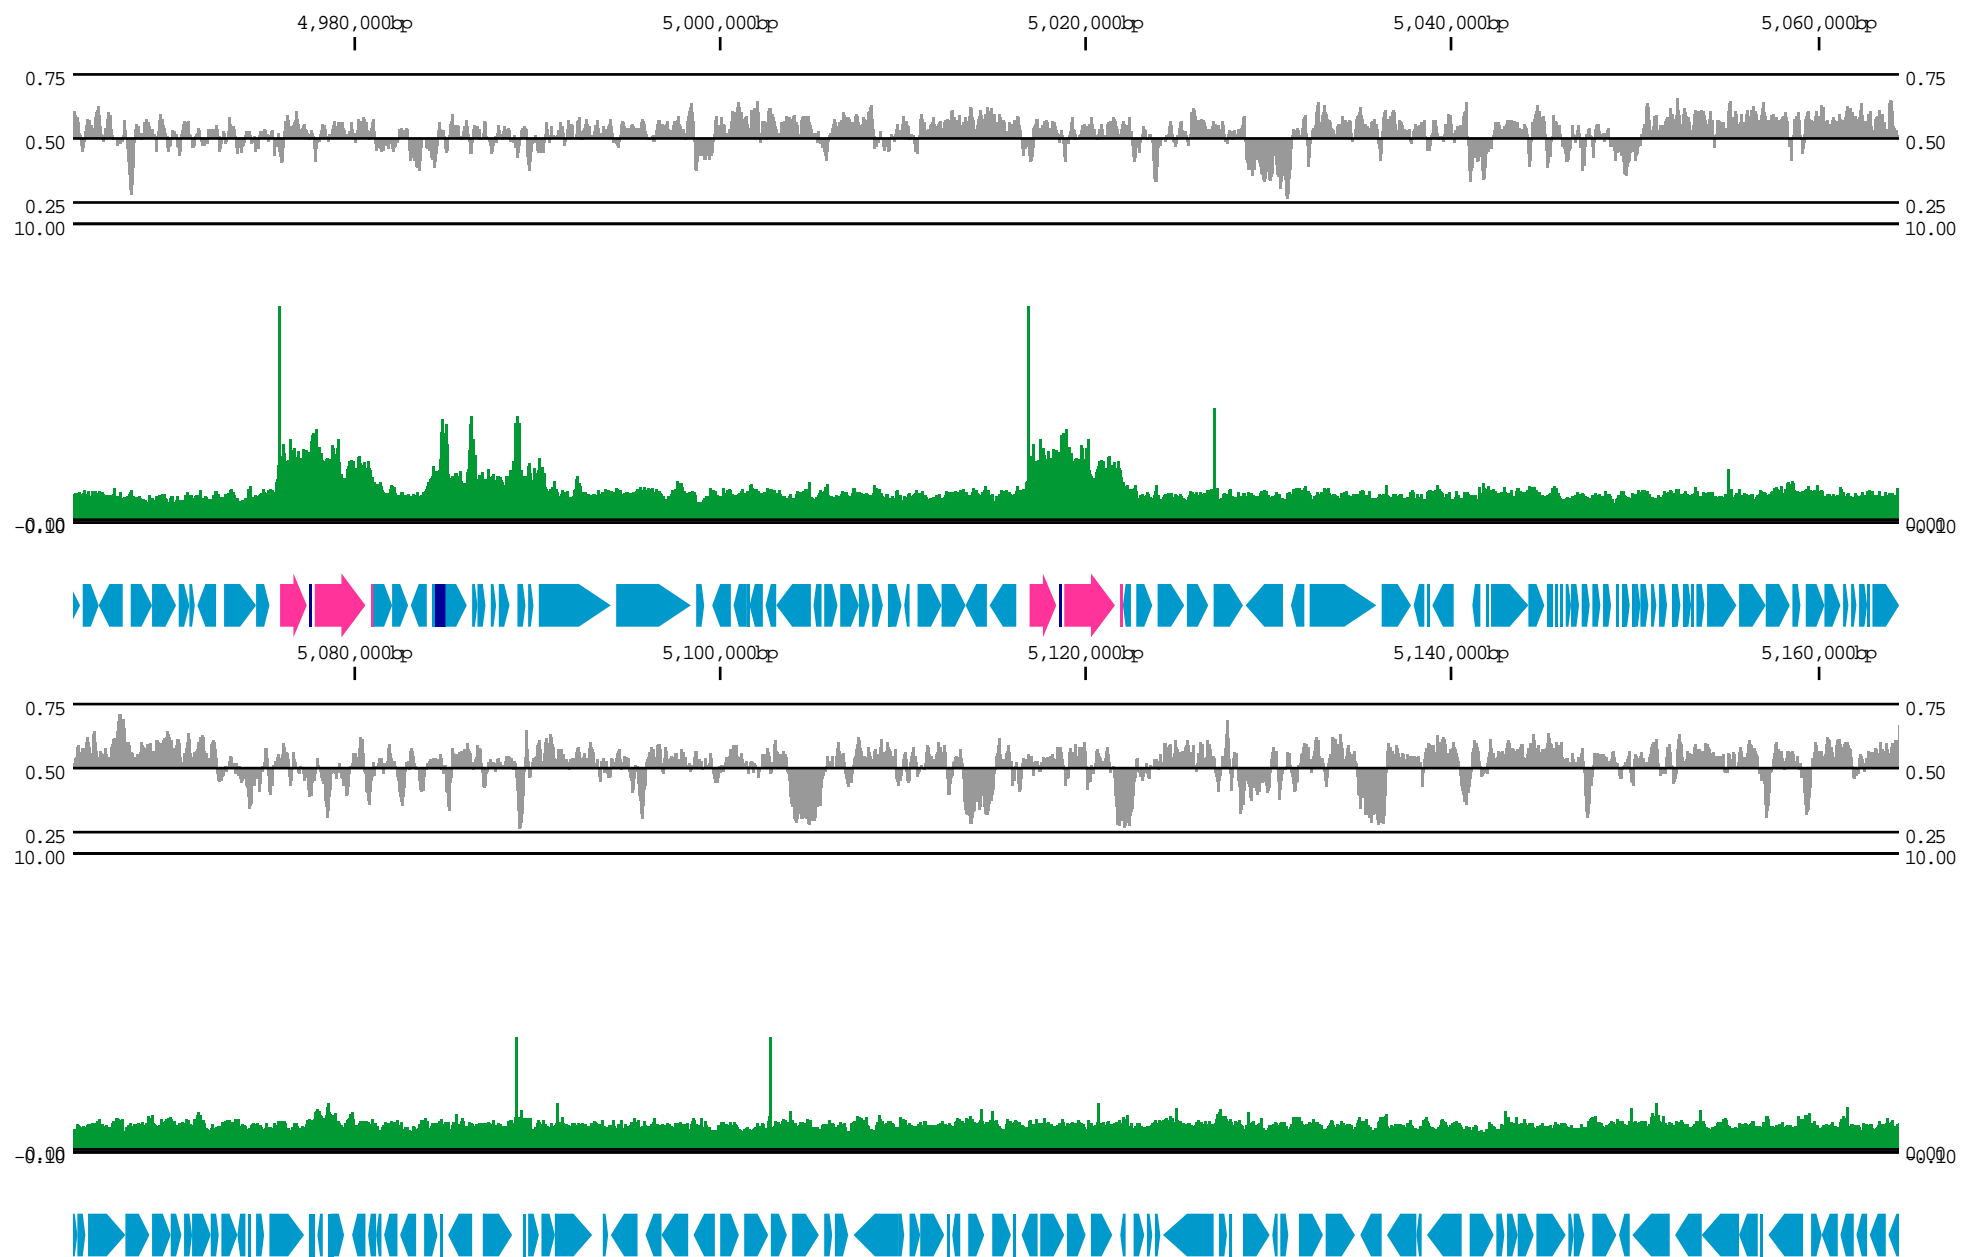

Fig. S1 (cont.)

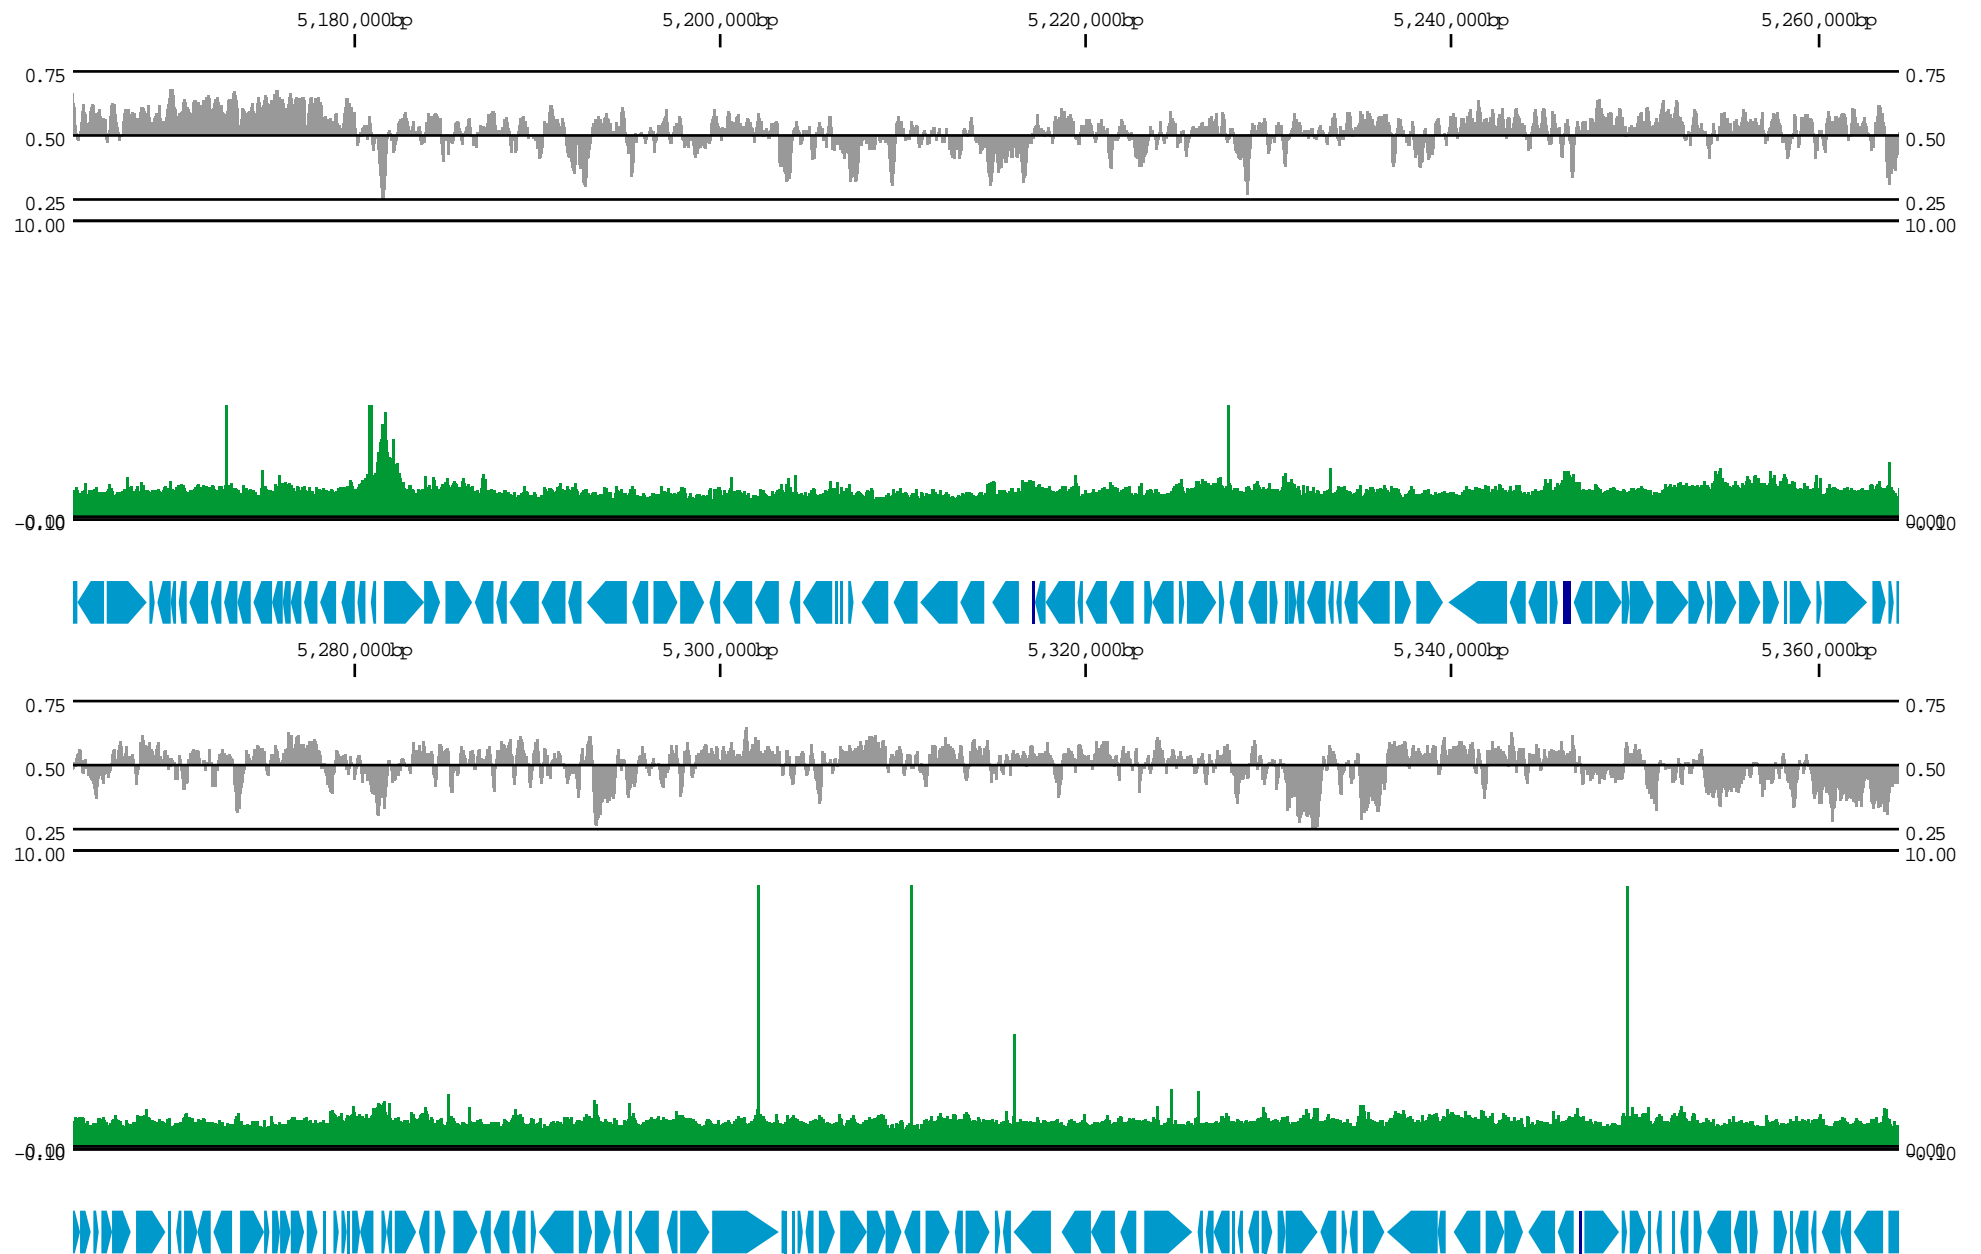

Fig. S1 (cont.)

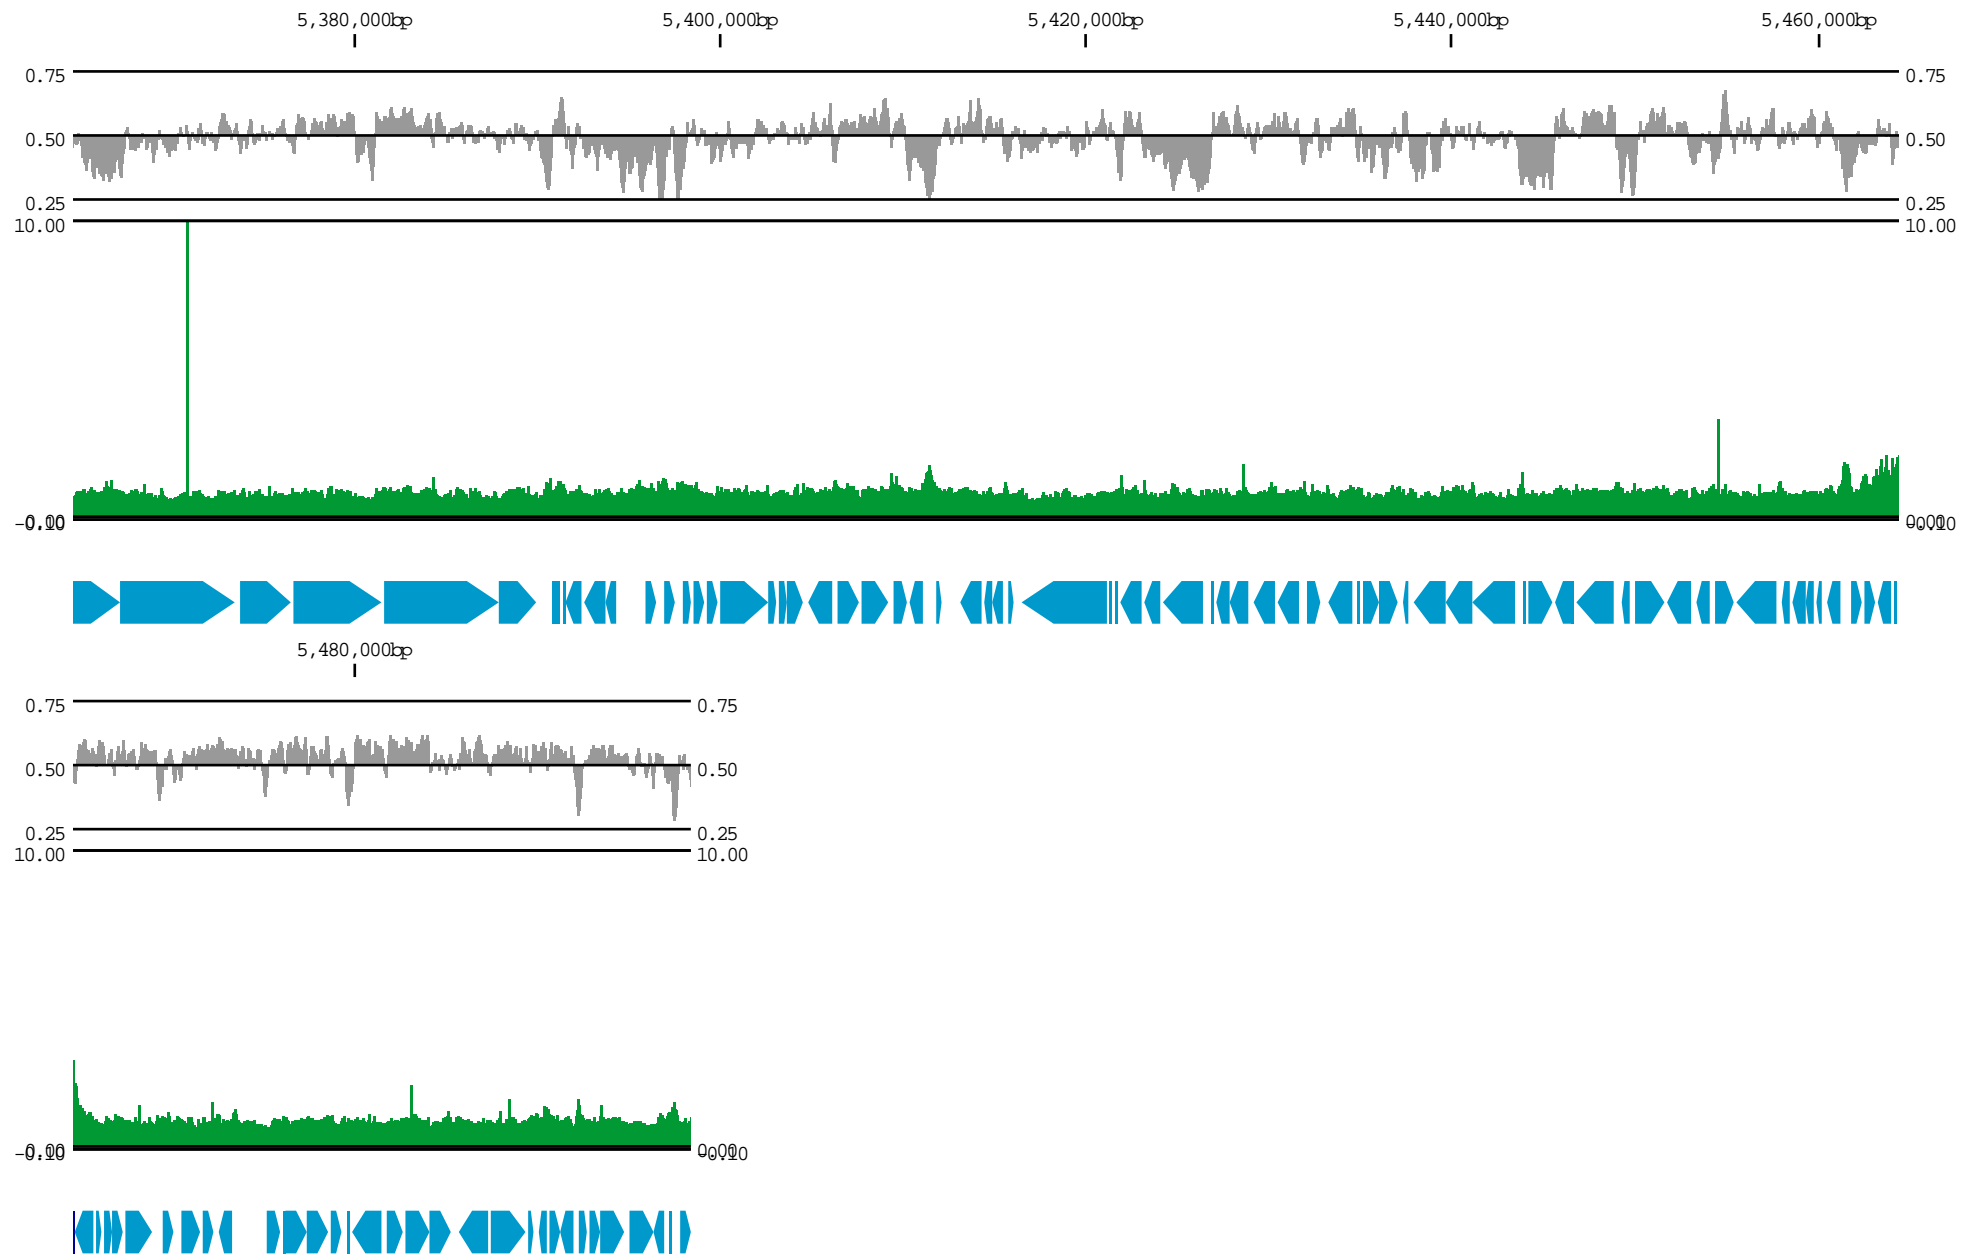

Fig. S2

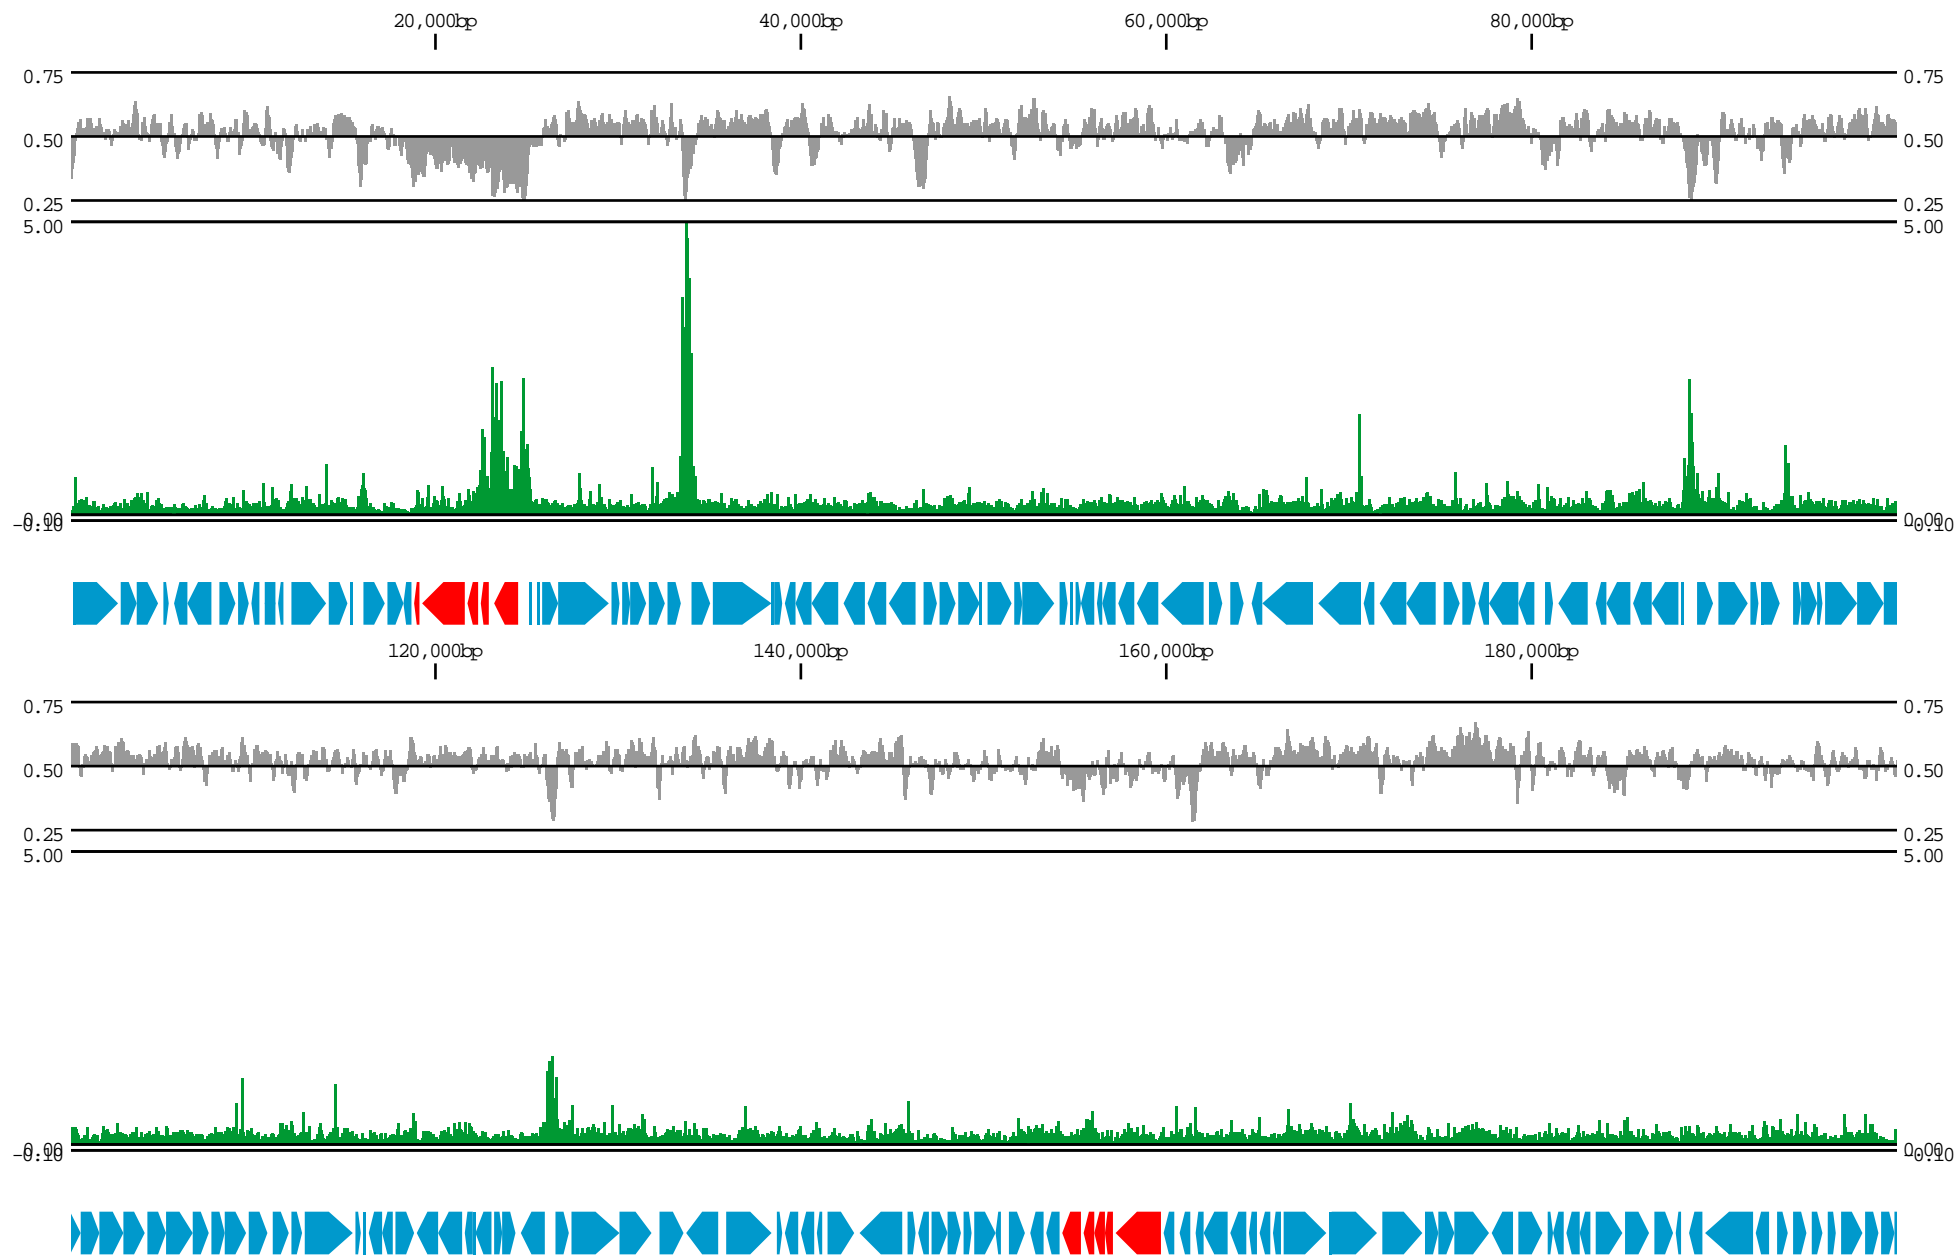

Fig. S2 (cont.)

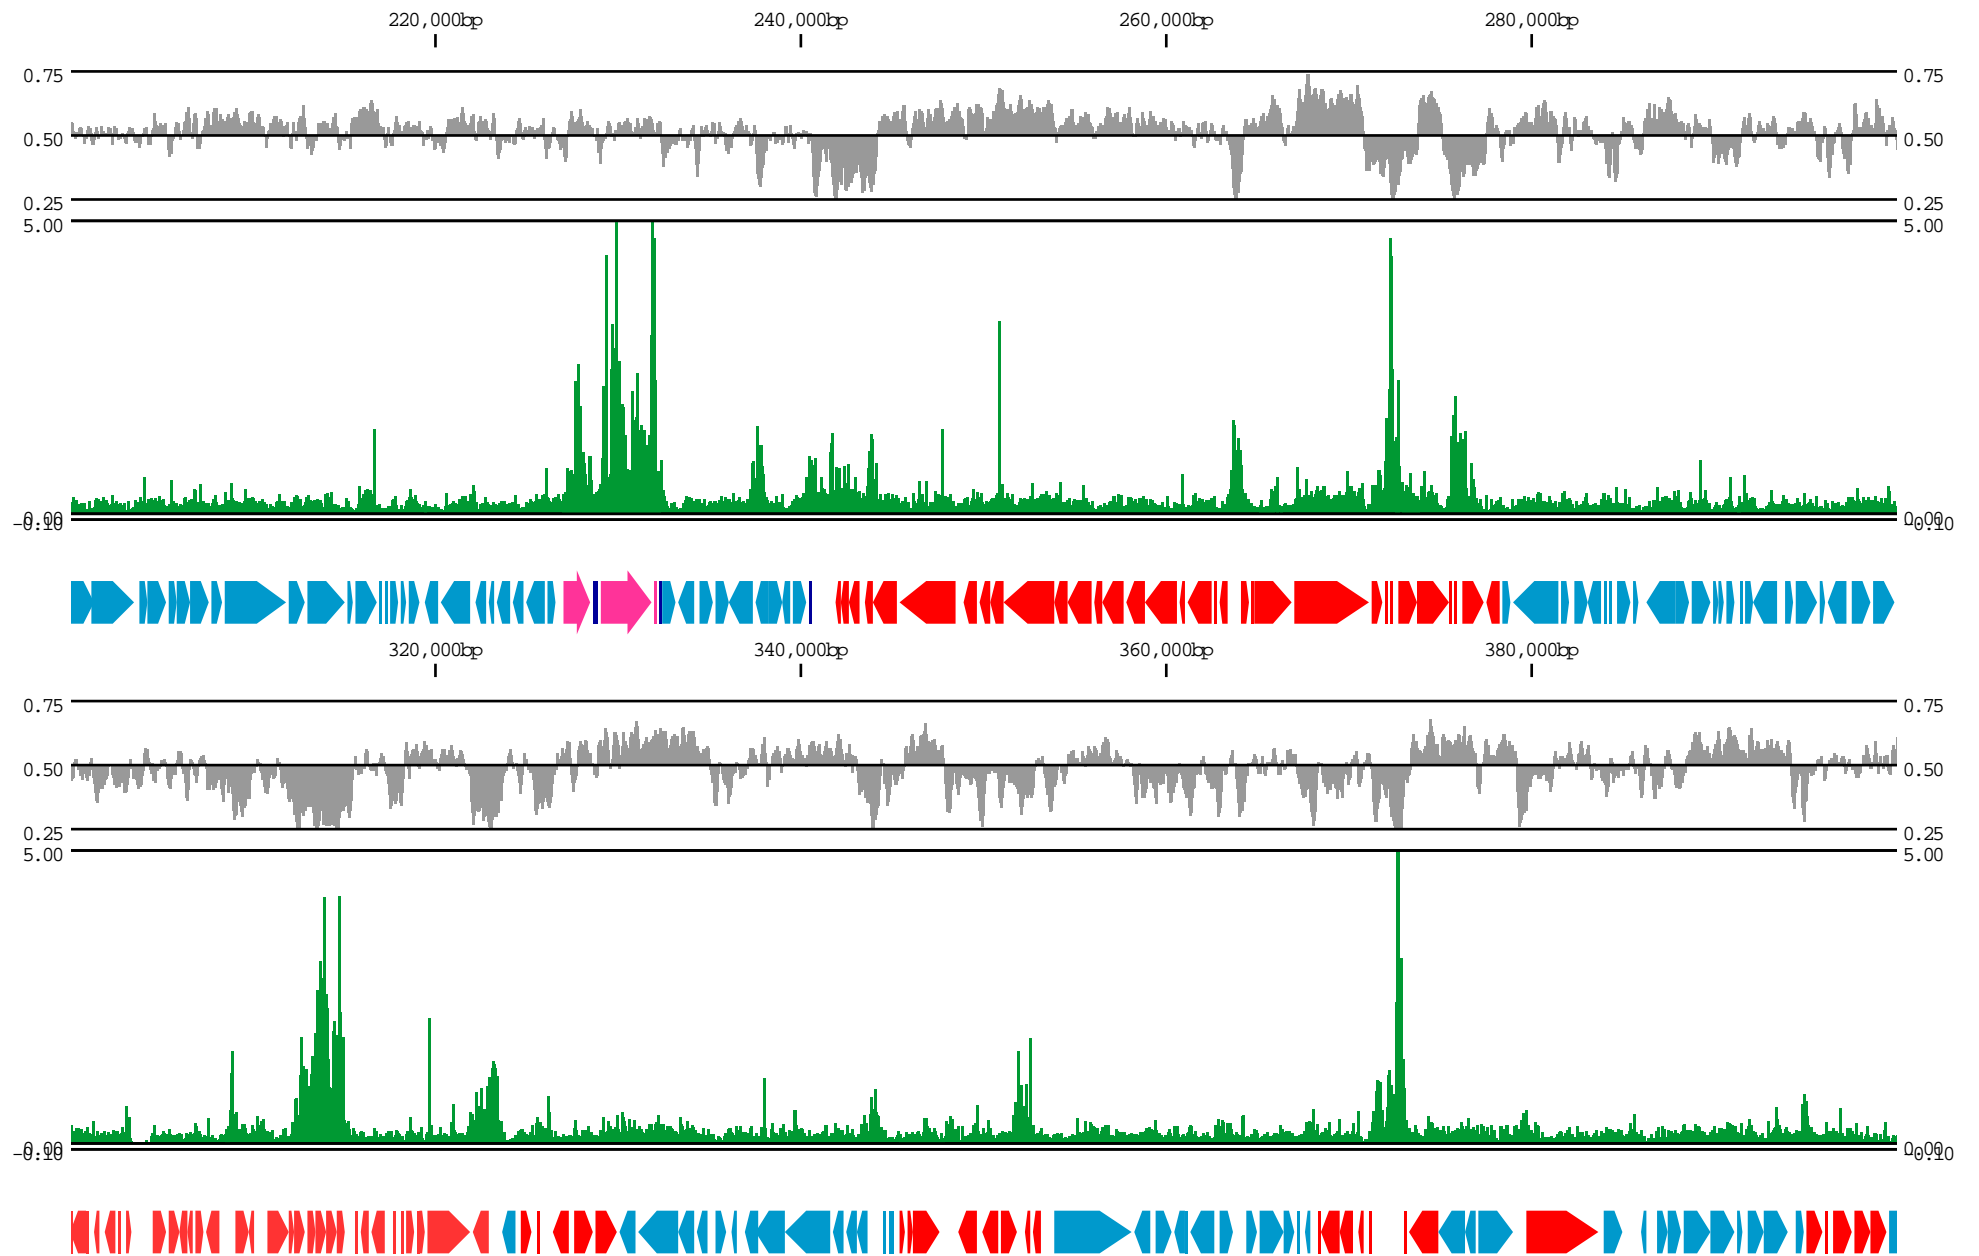

Fig. S2 (cont.)

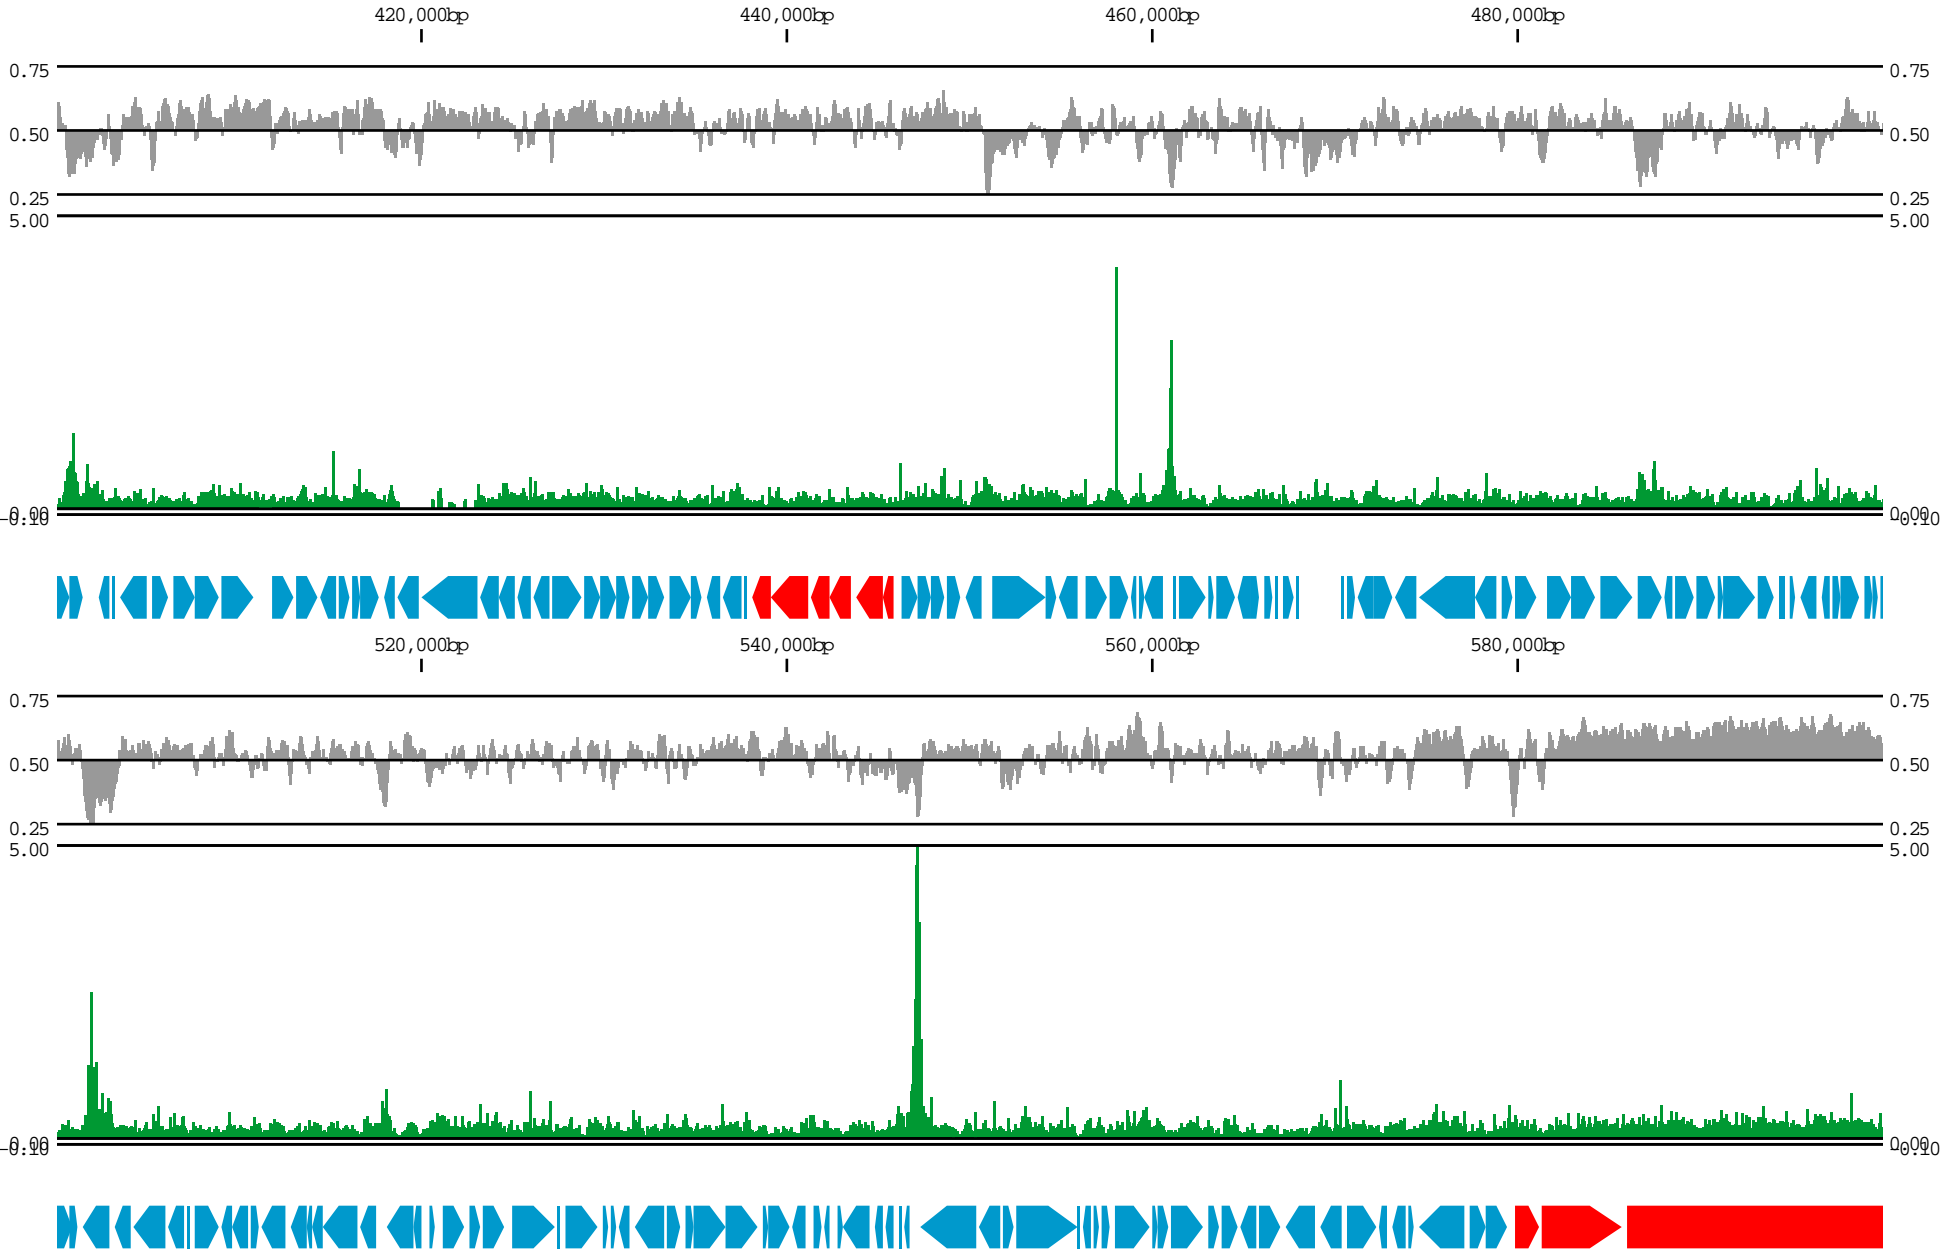



Fig. S2 (cont.)

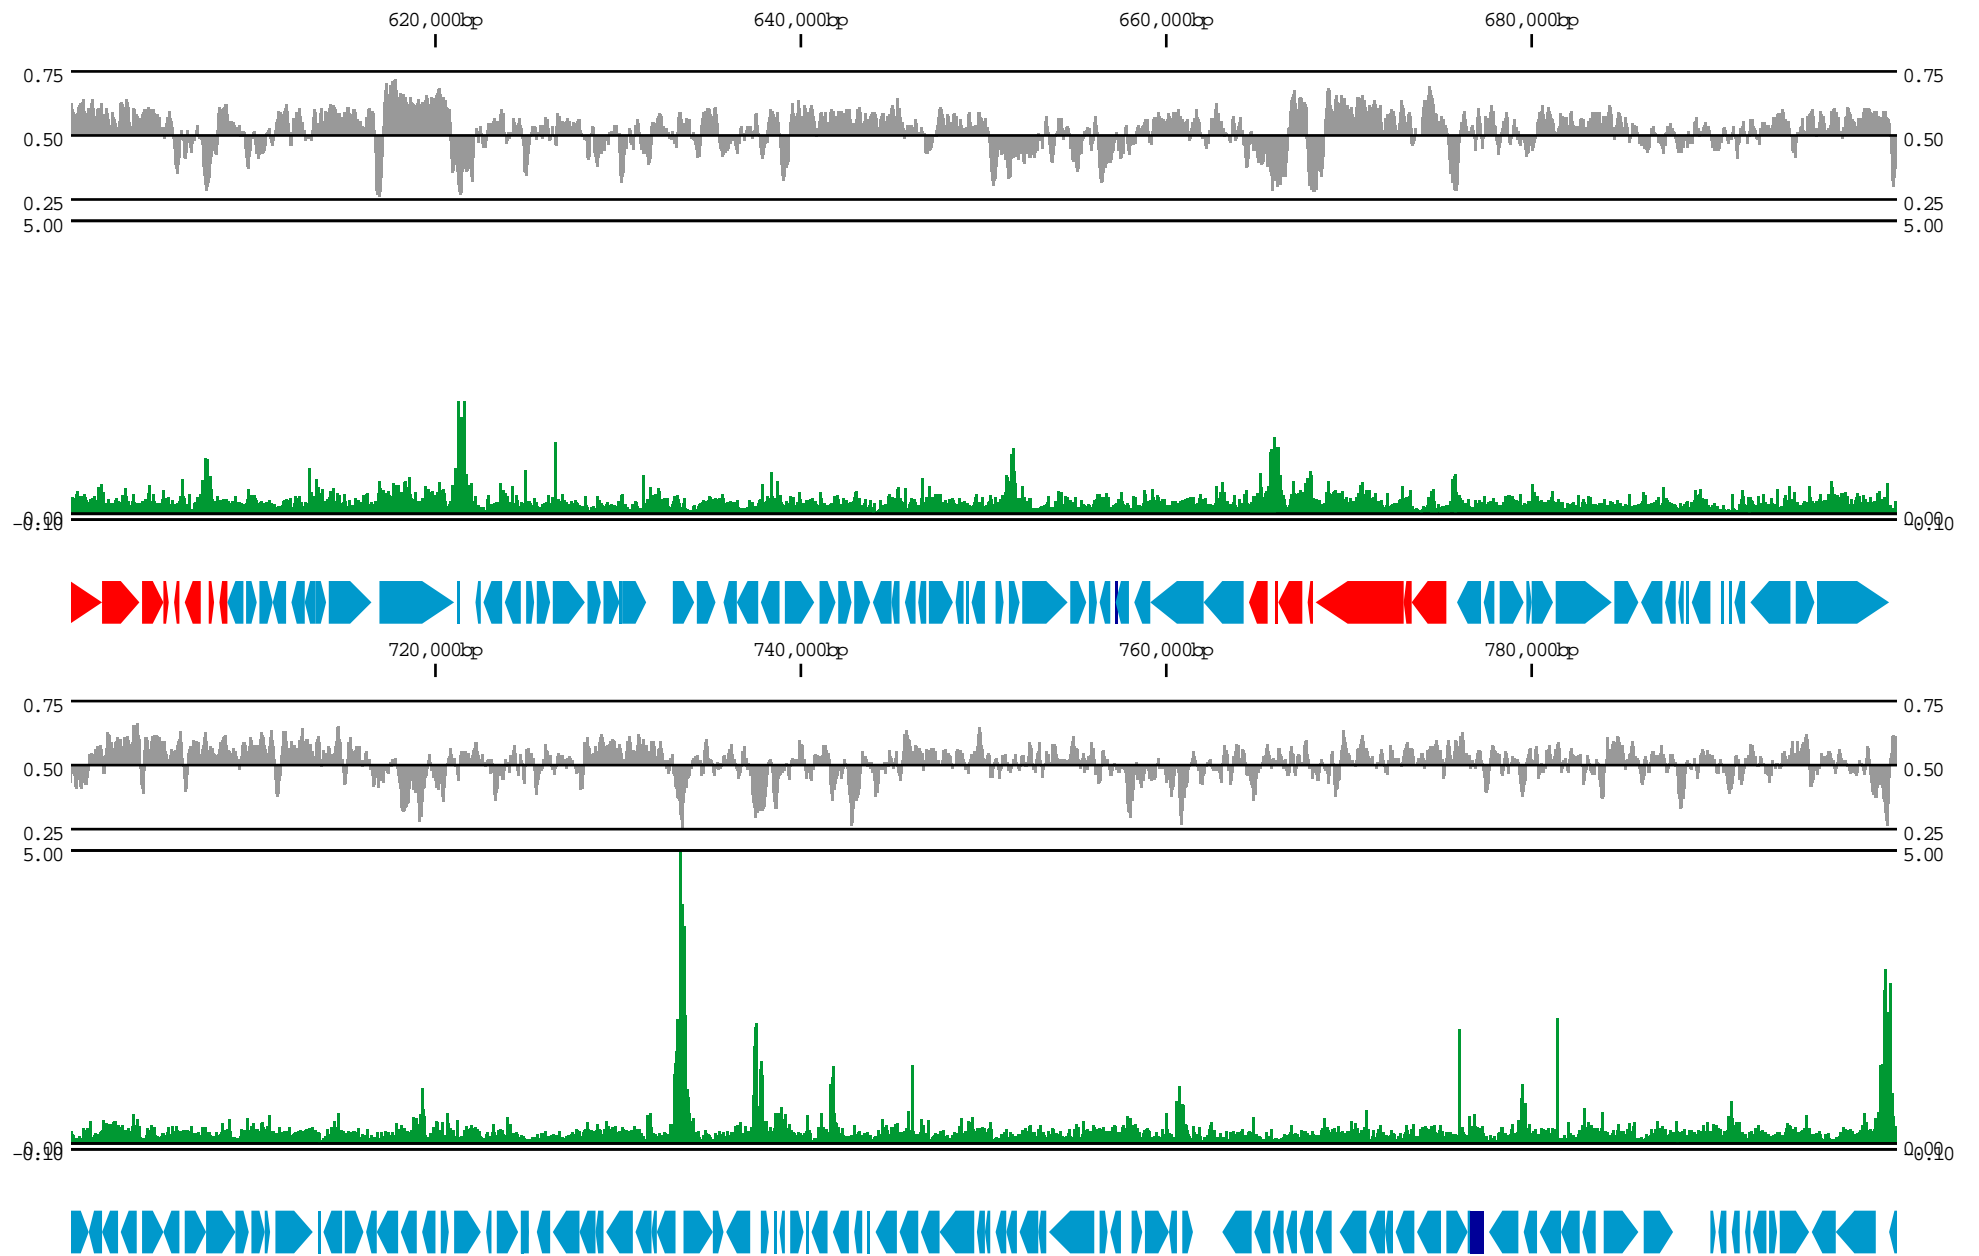

Fig. S2 (cont.)

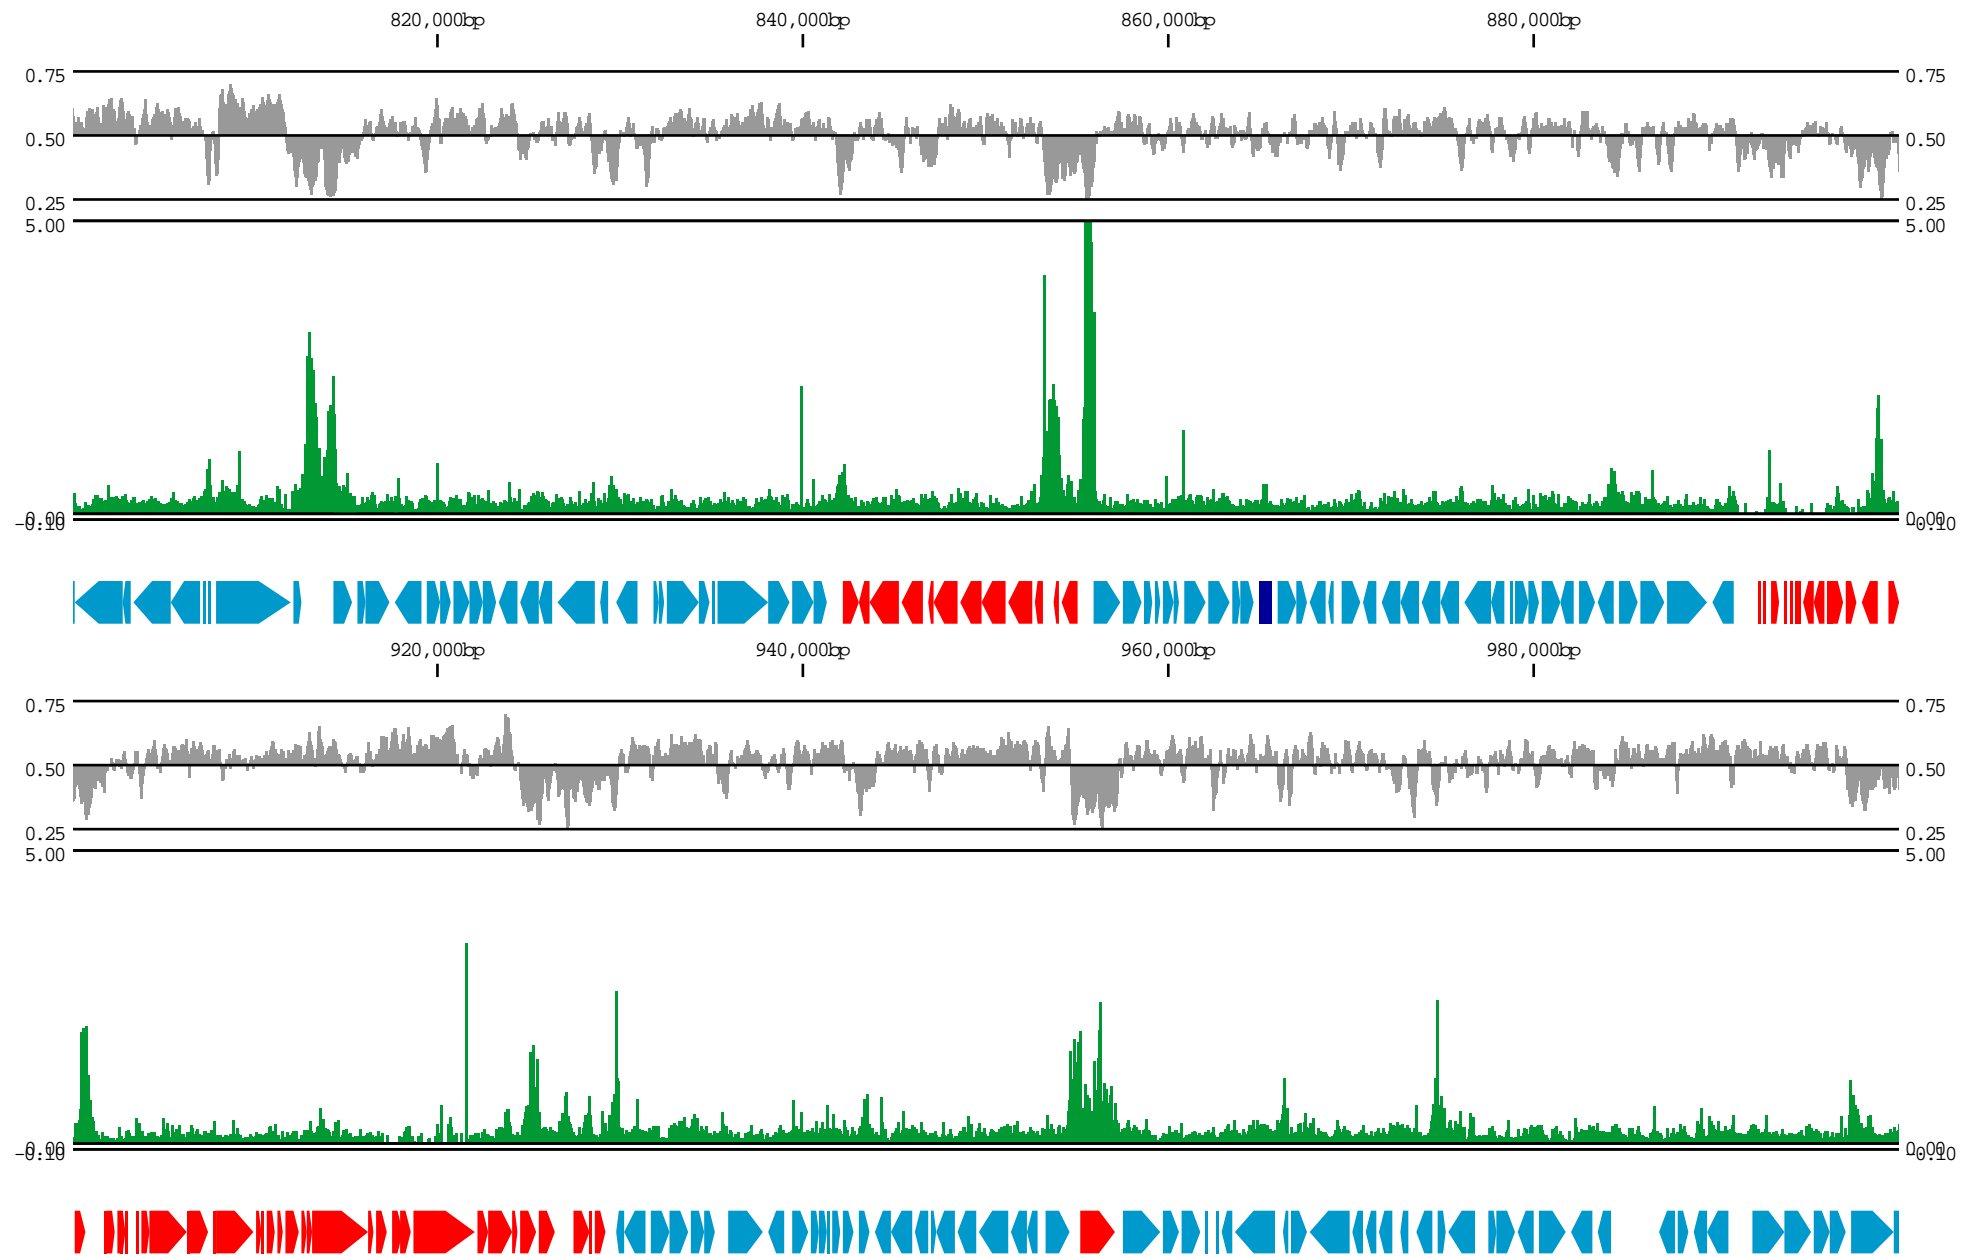

Fig. S2 (cont.)

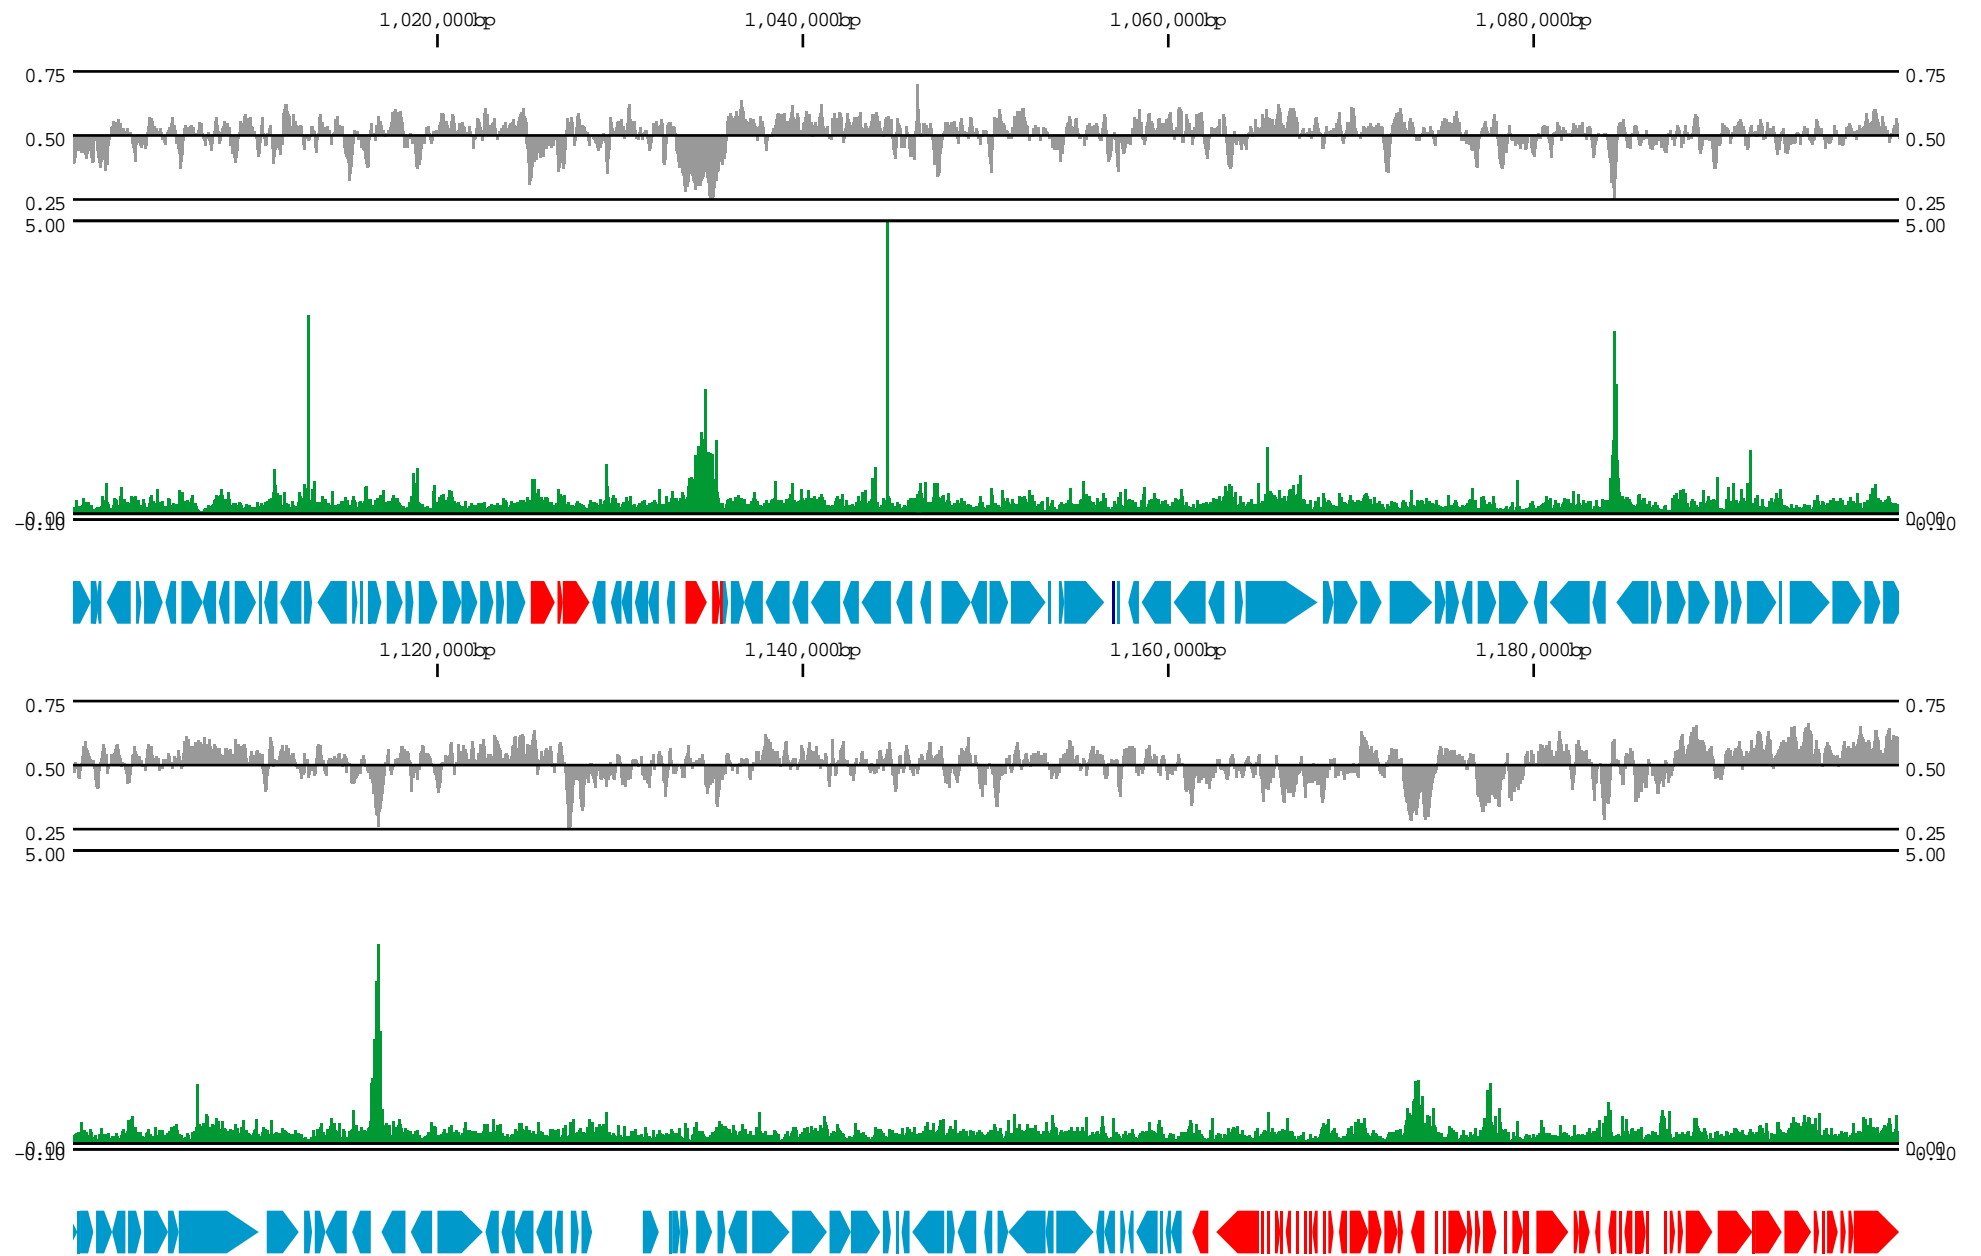

Fig. S2 (cont.)

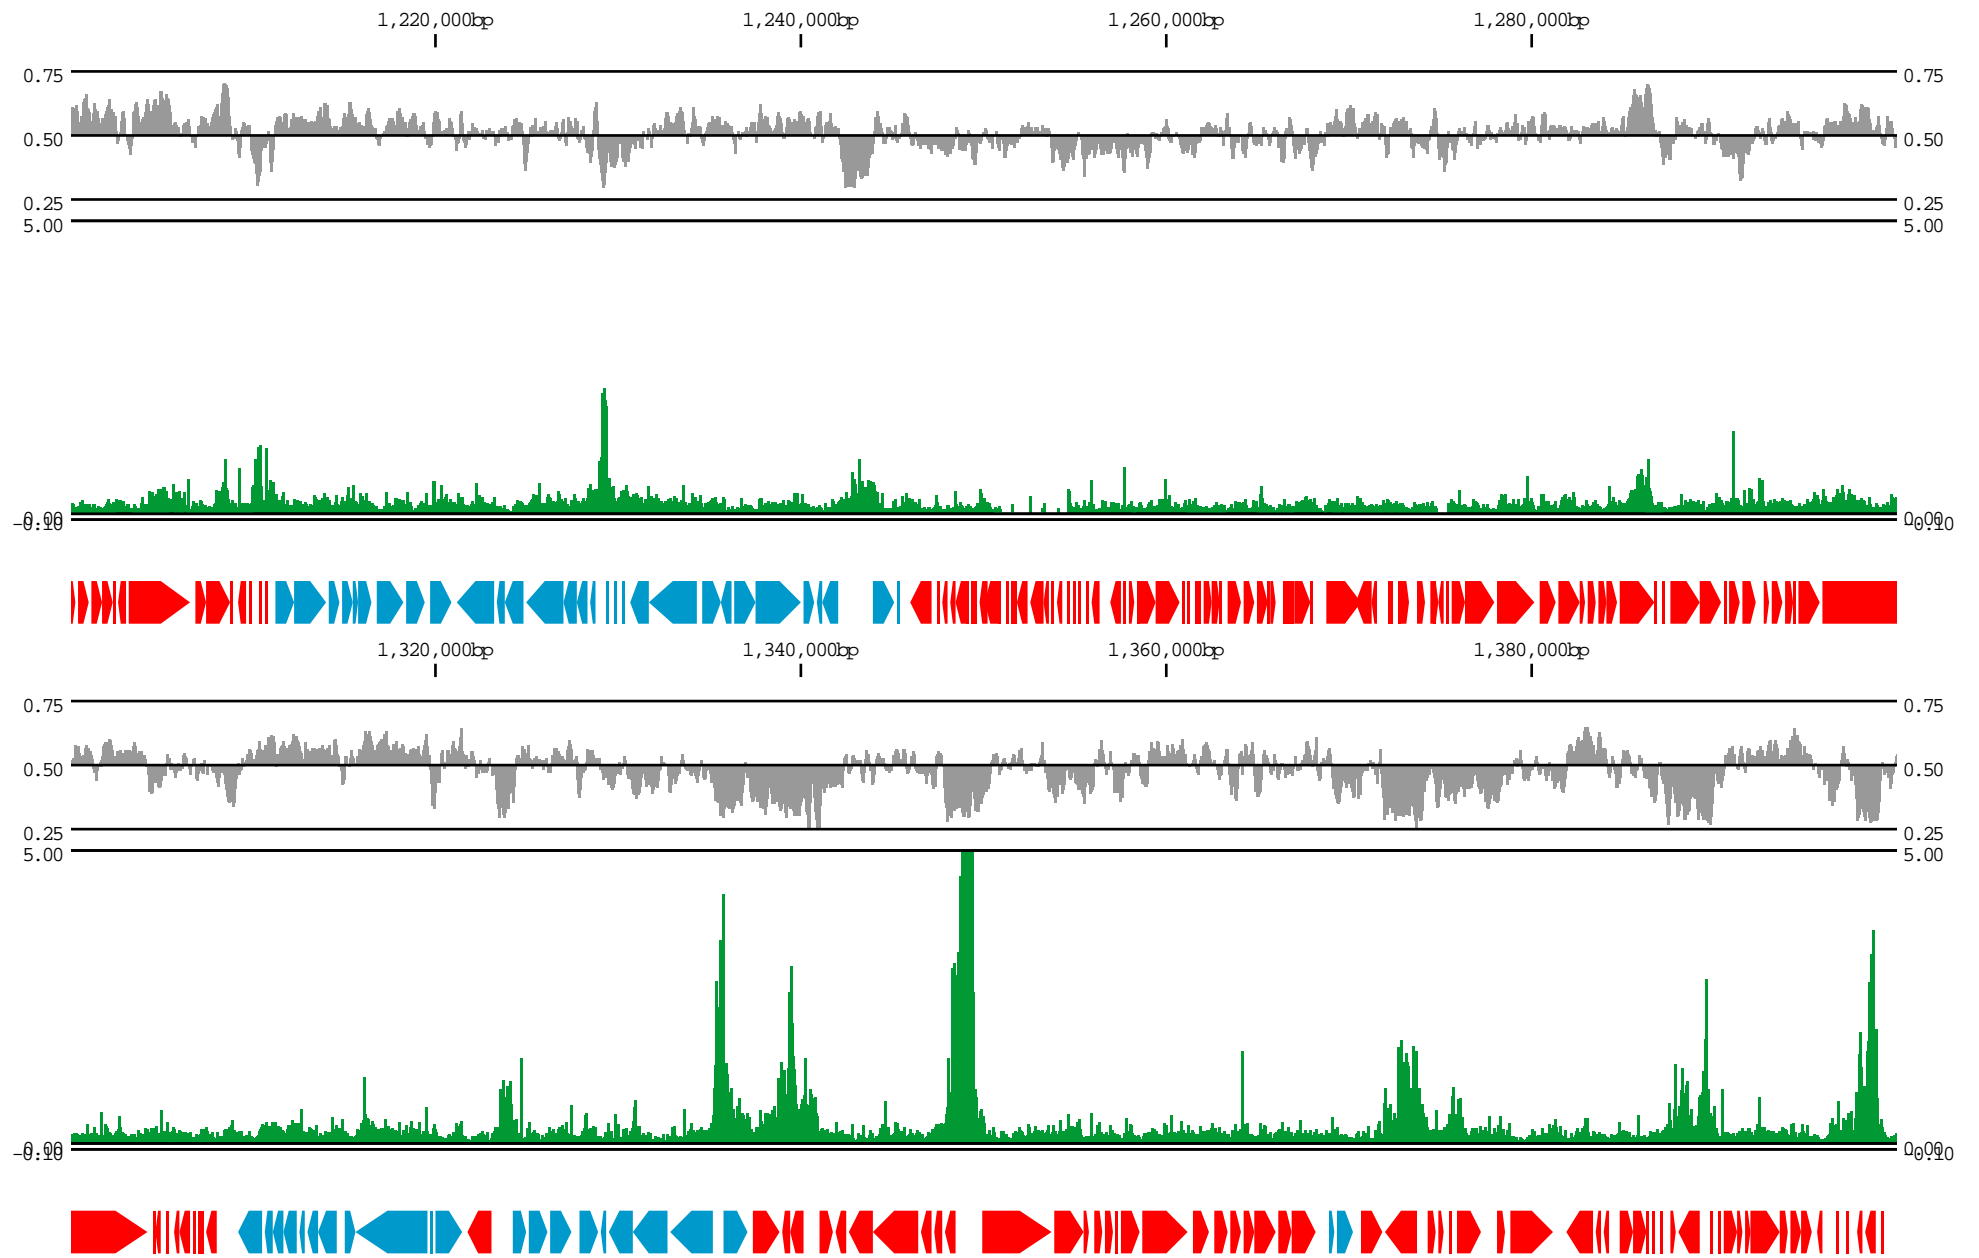

Fig. S2 (cont.)

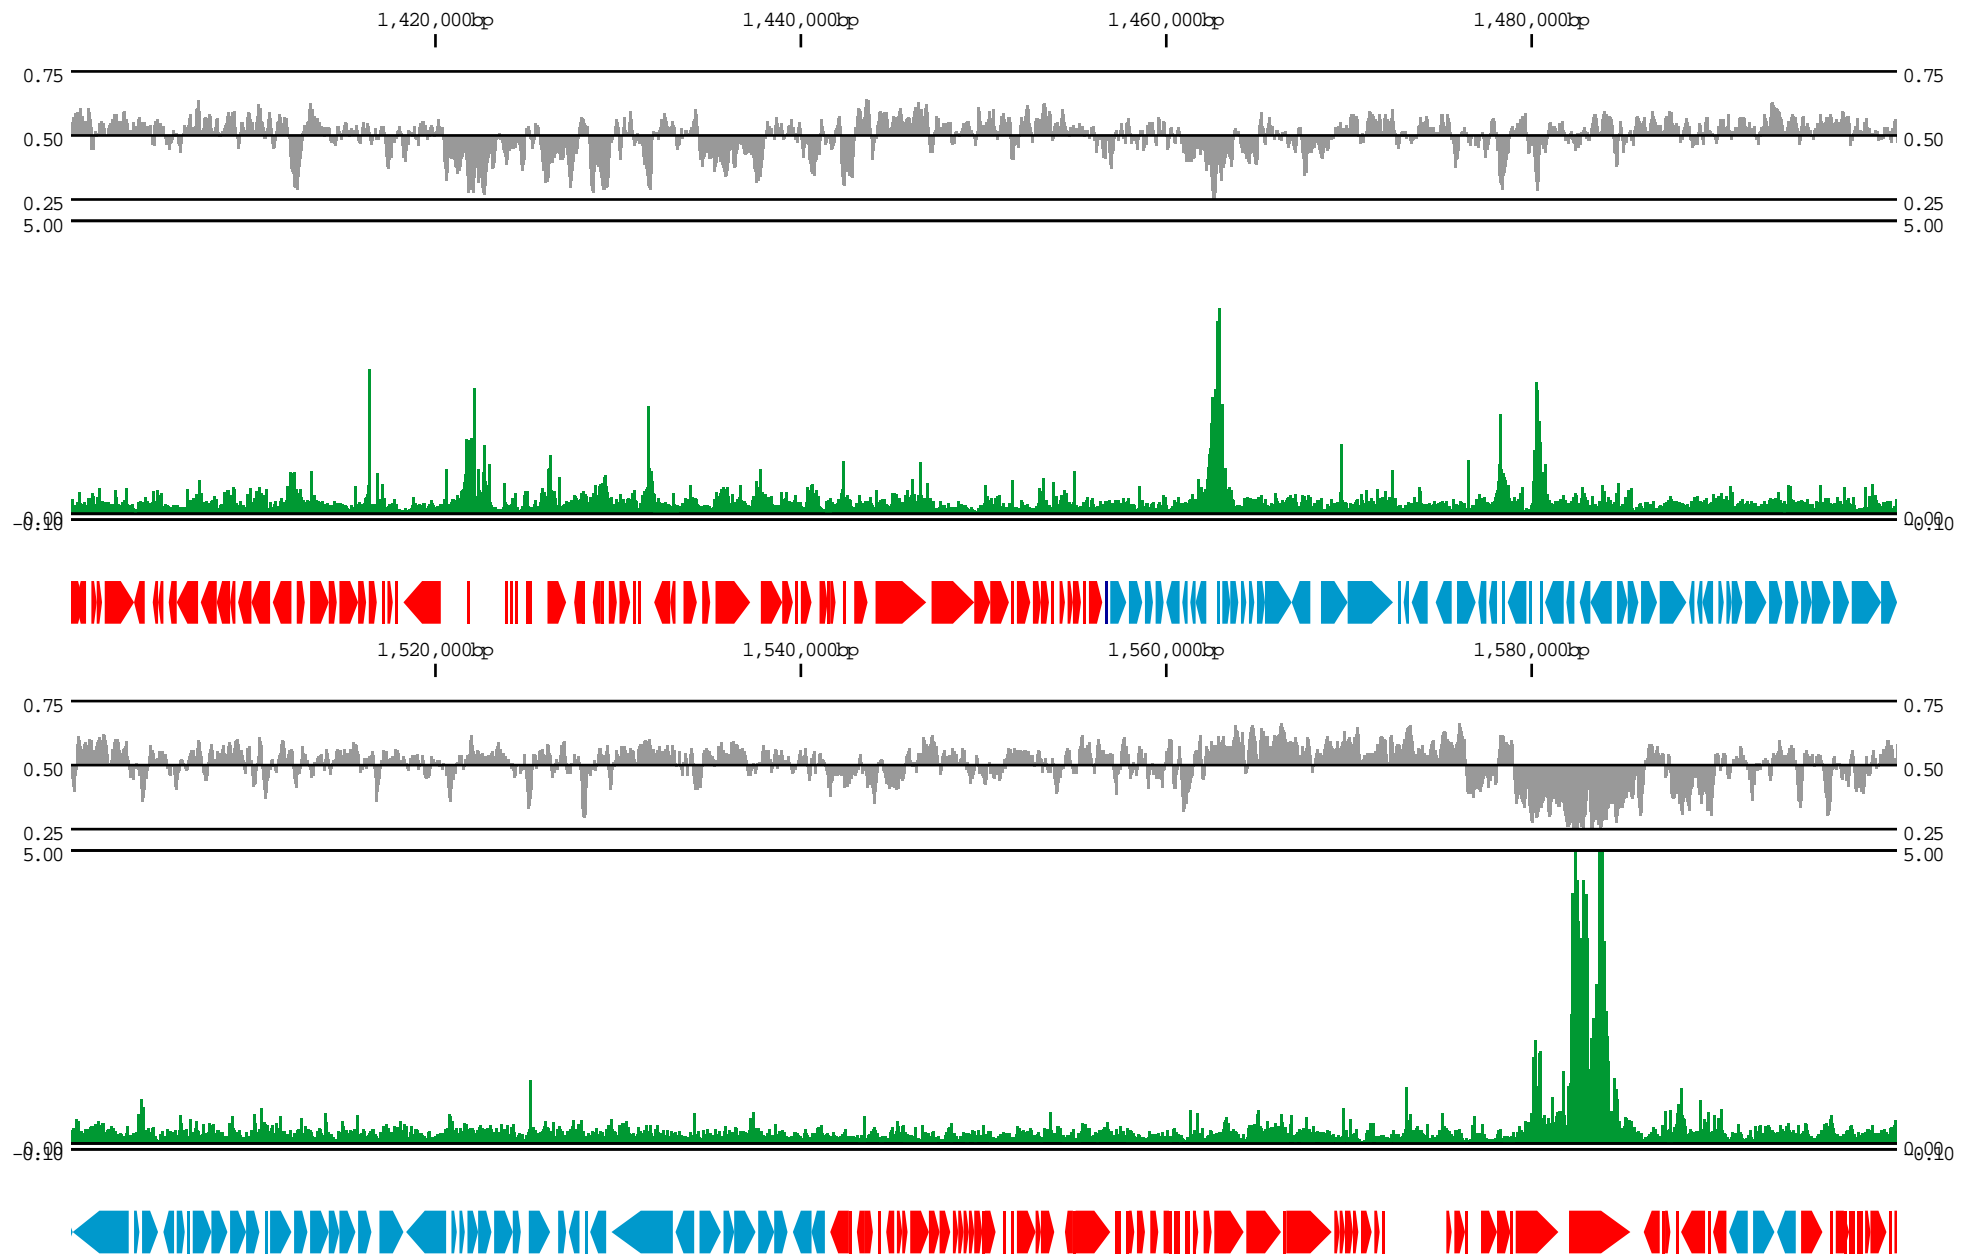

Fig. S2 (cont.)

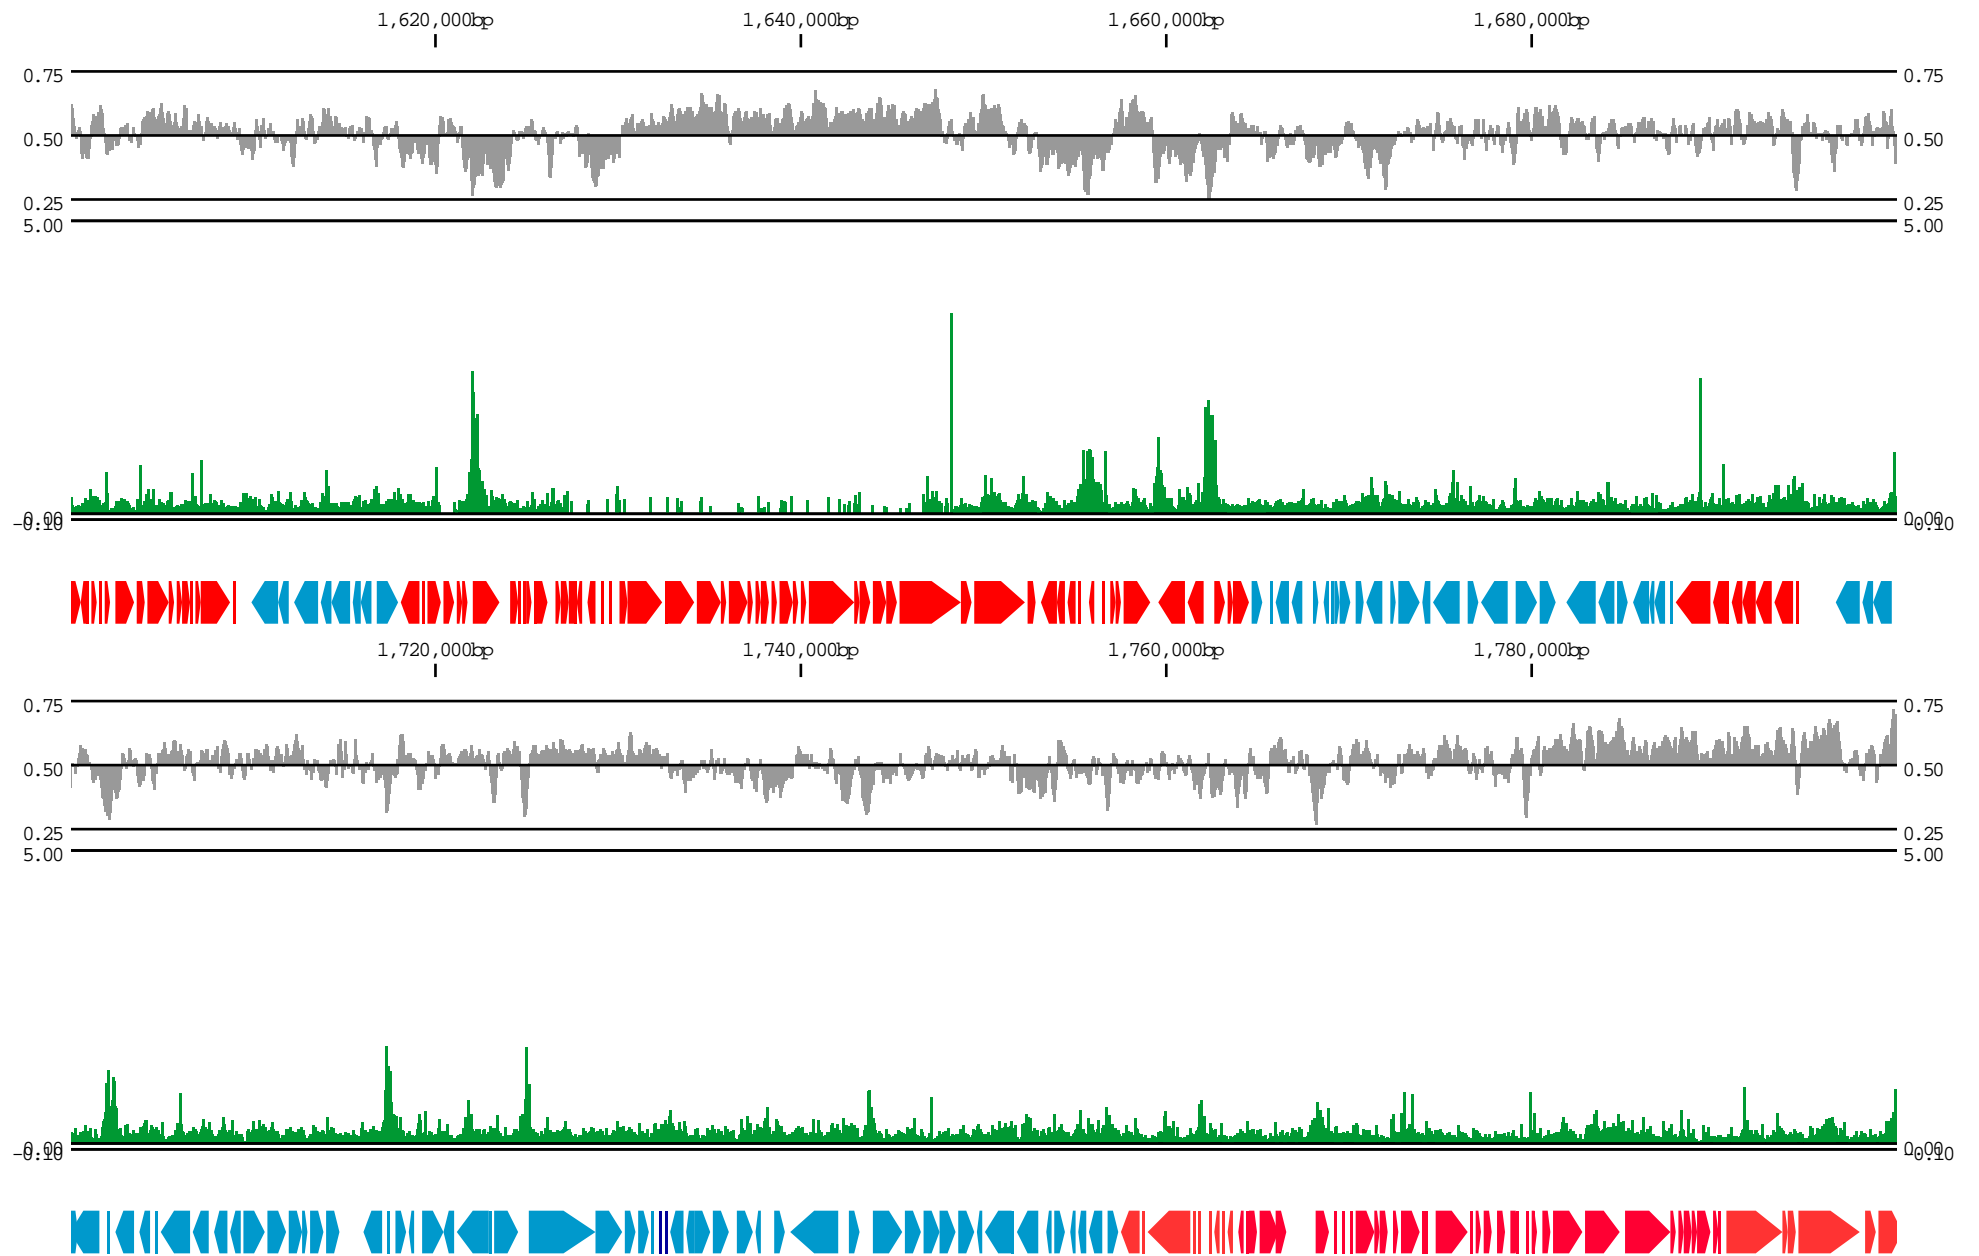

Fig. S2 (cont.)

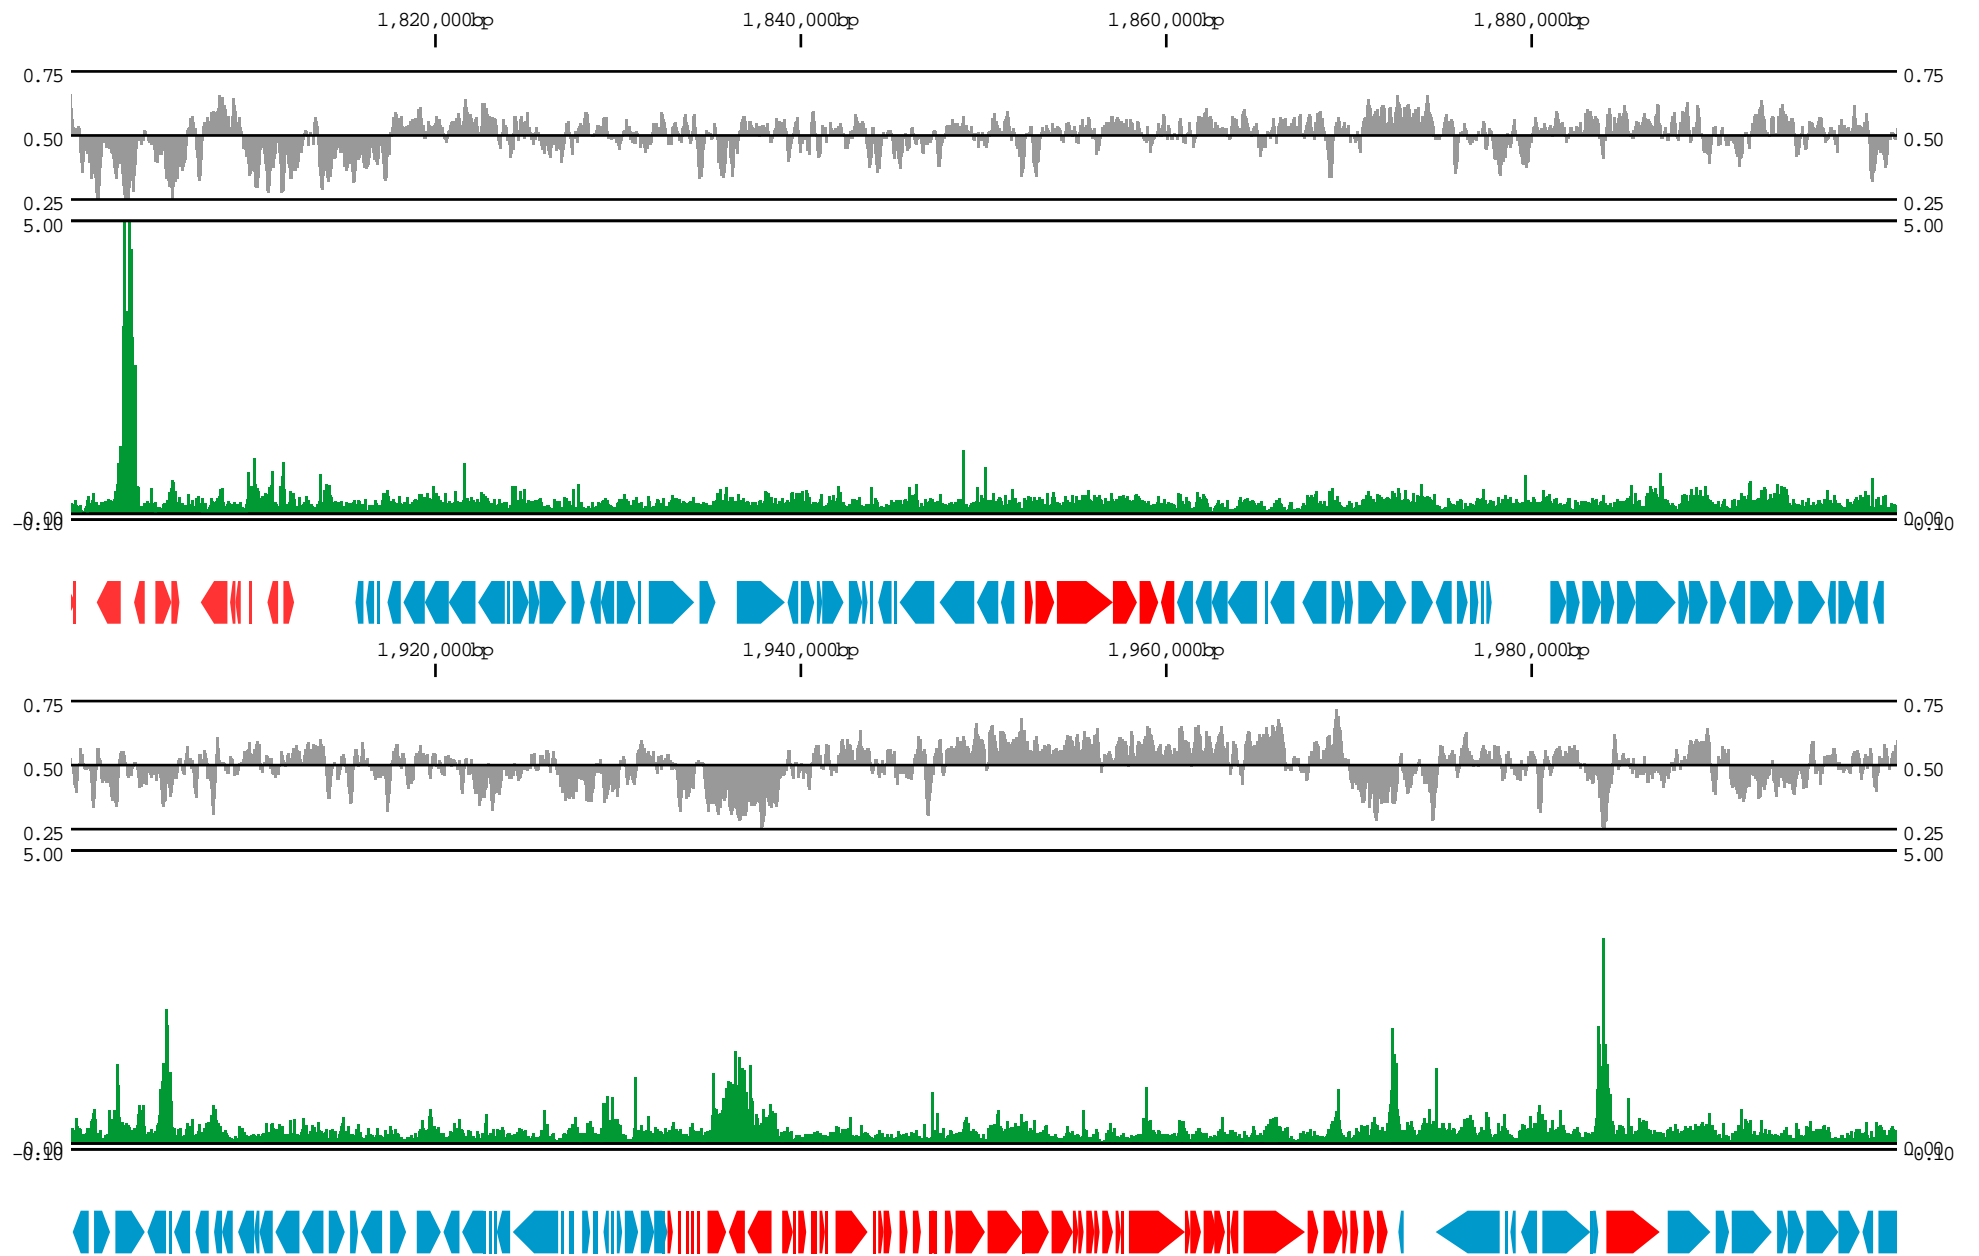

Fig. S2 (cont.)

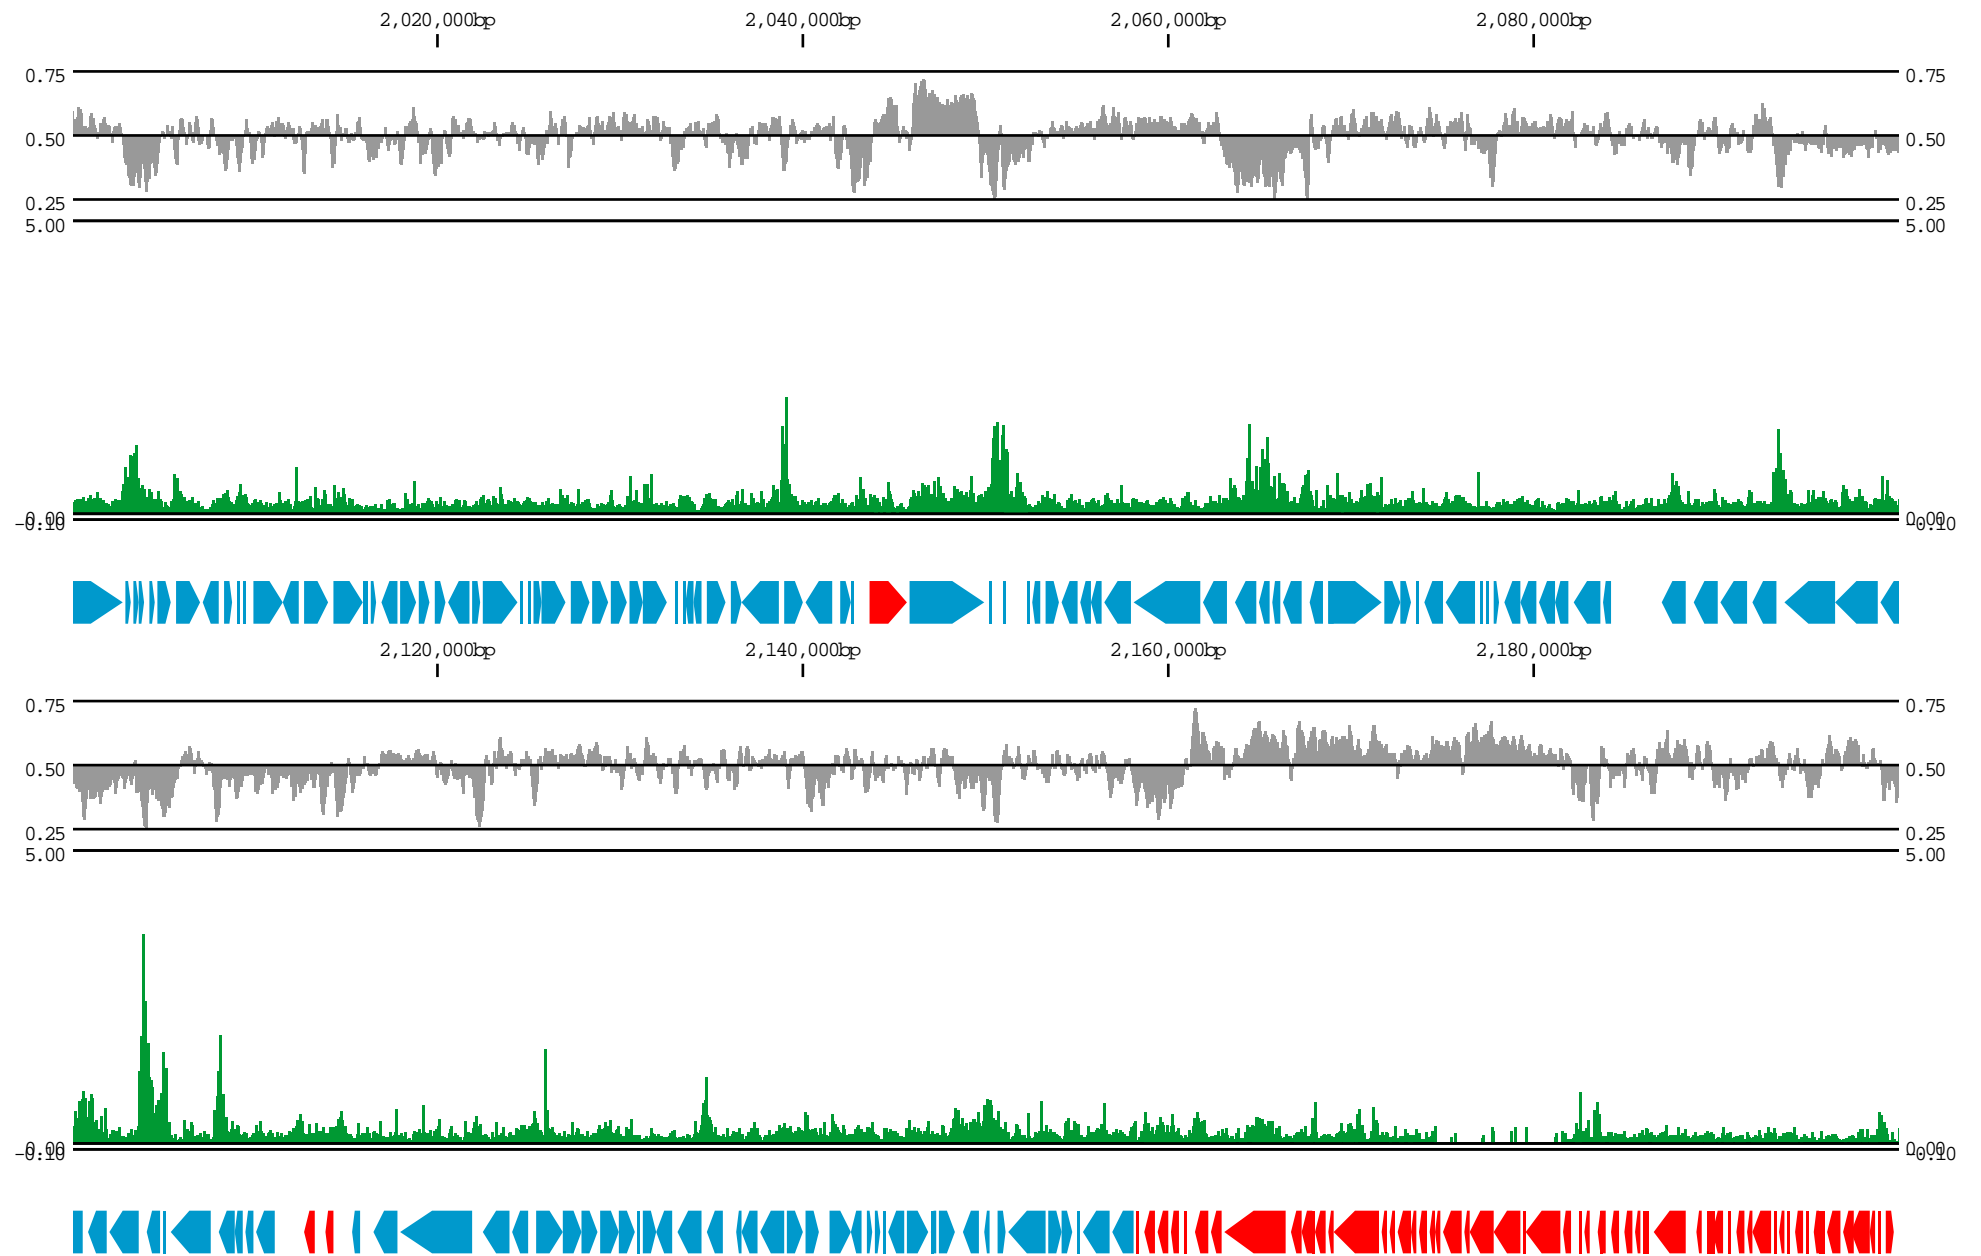



Fig. S2 (cont.)

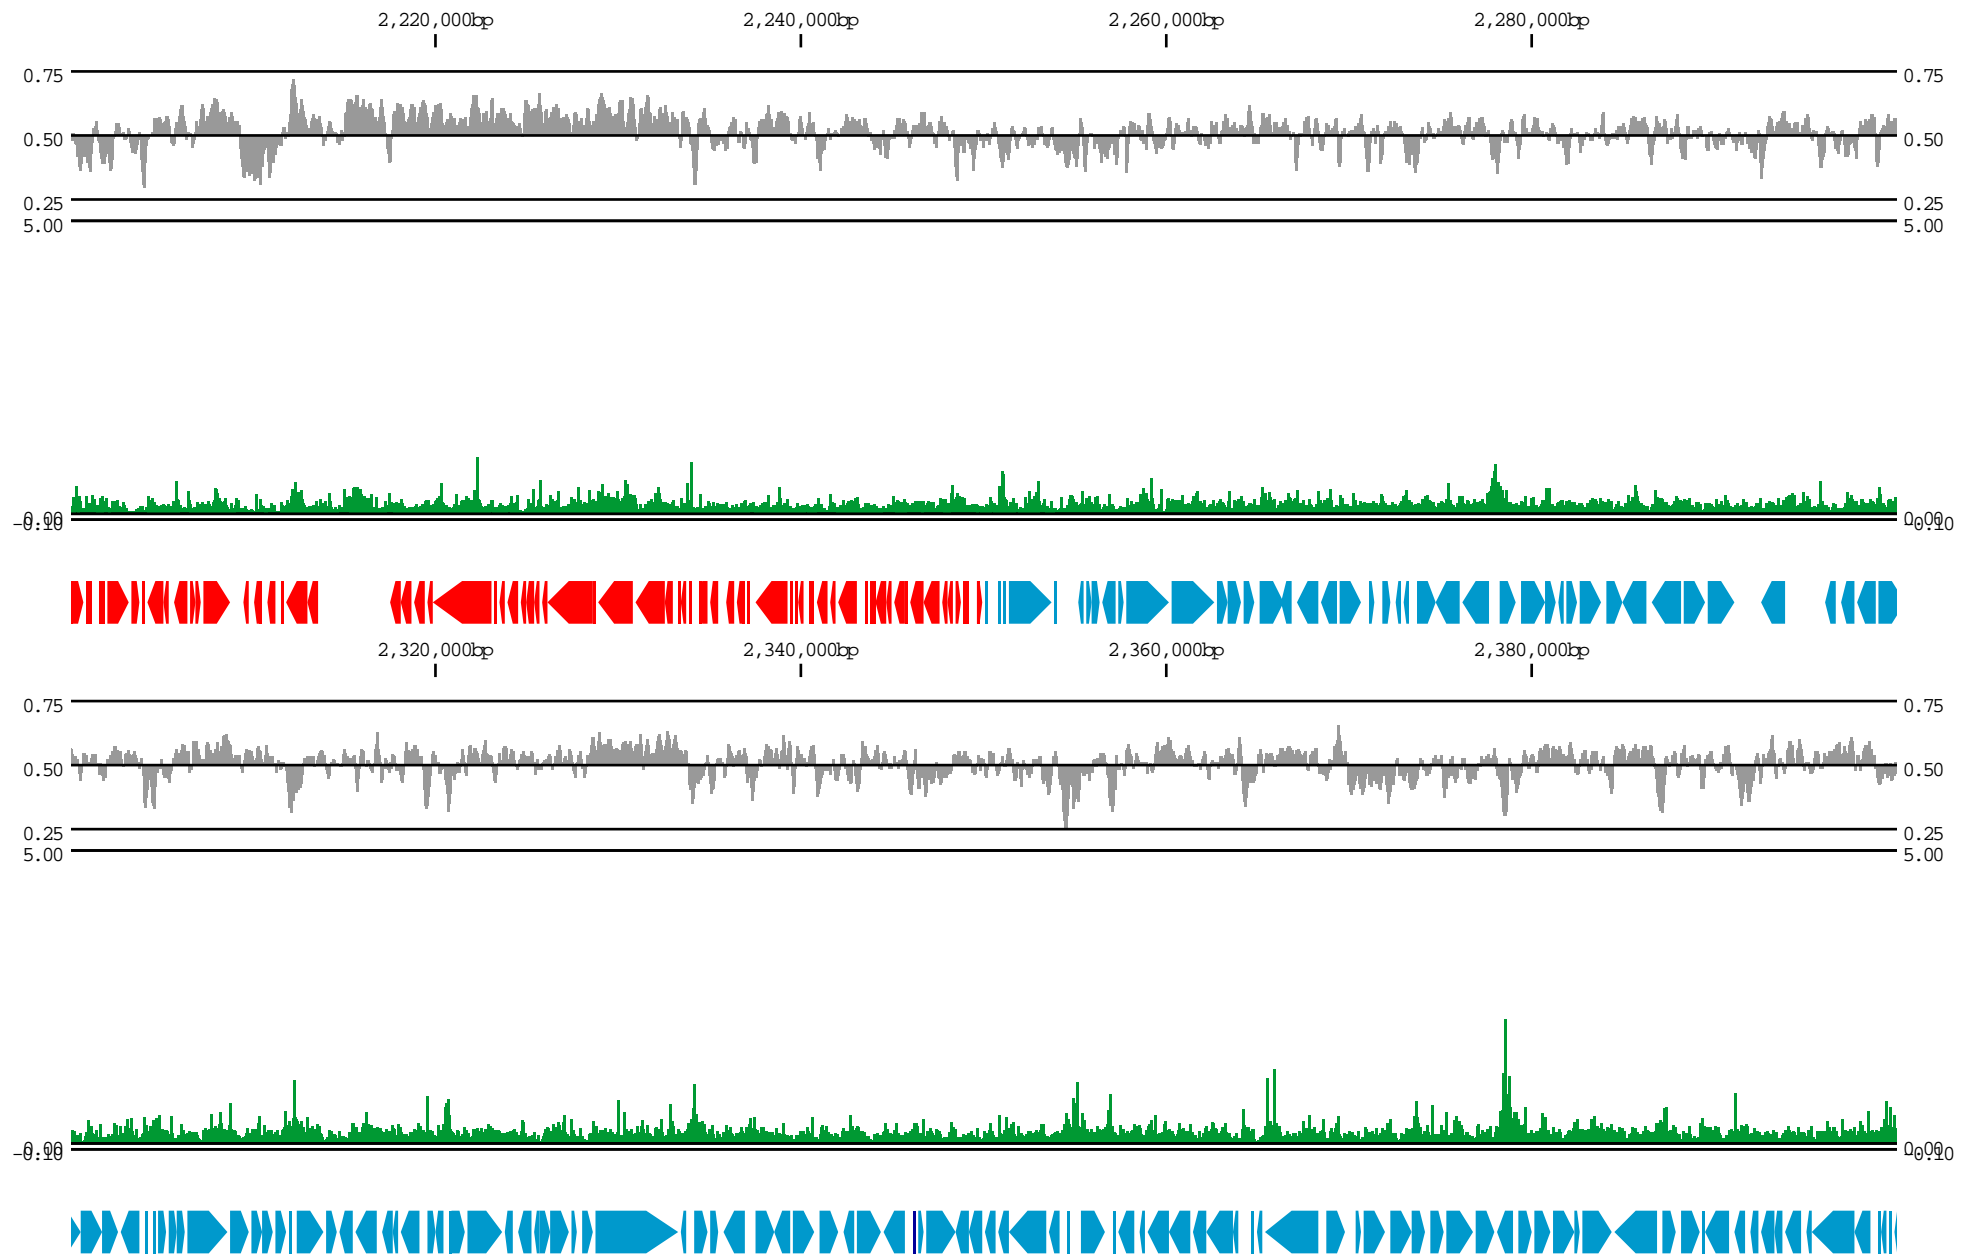

Fig. S2 (cont.)

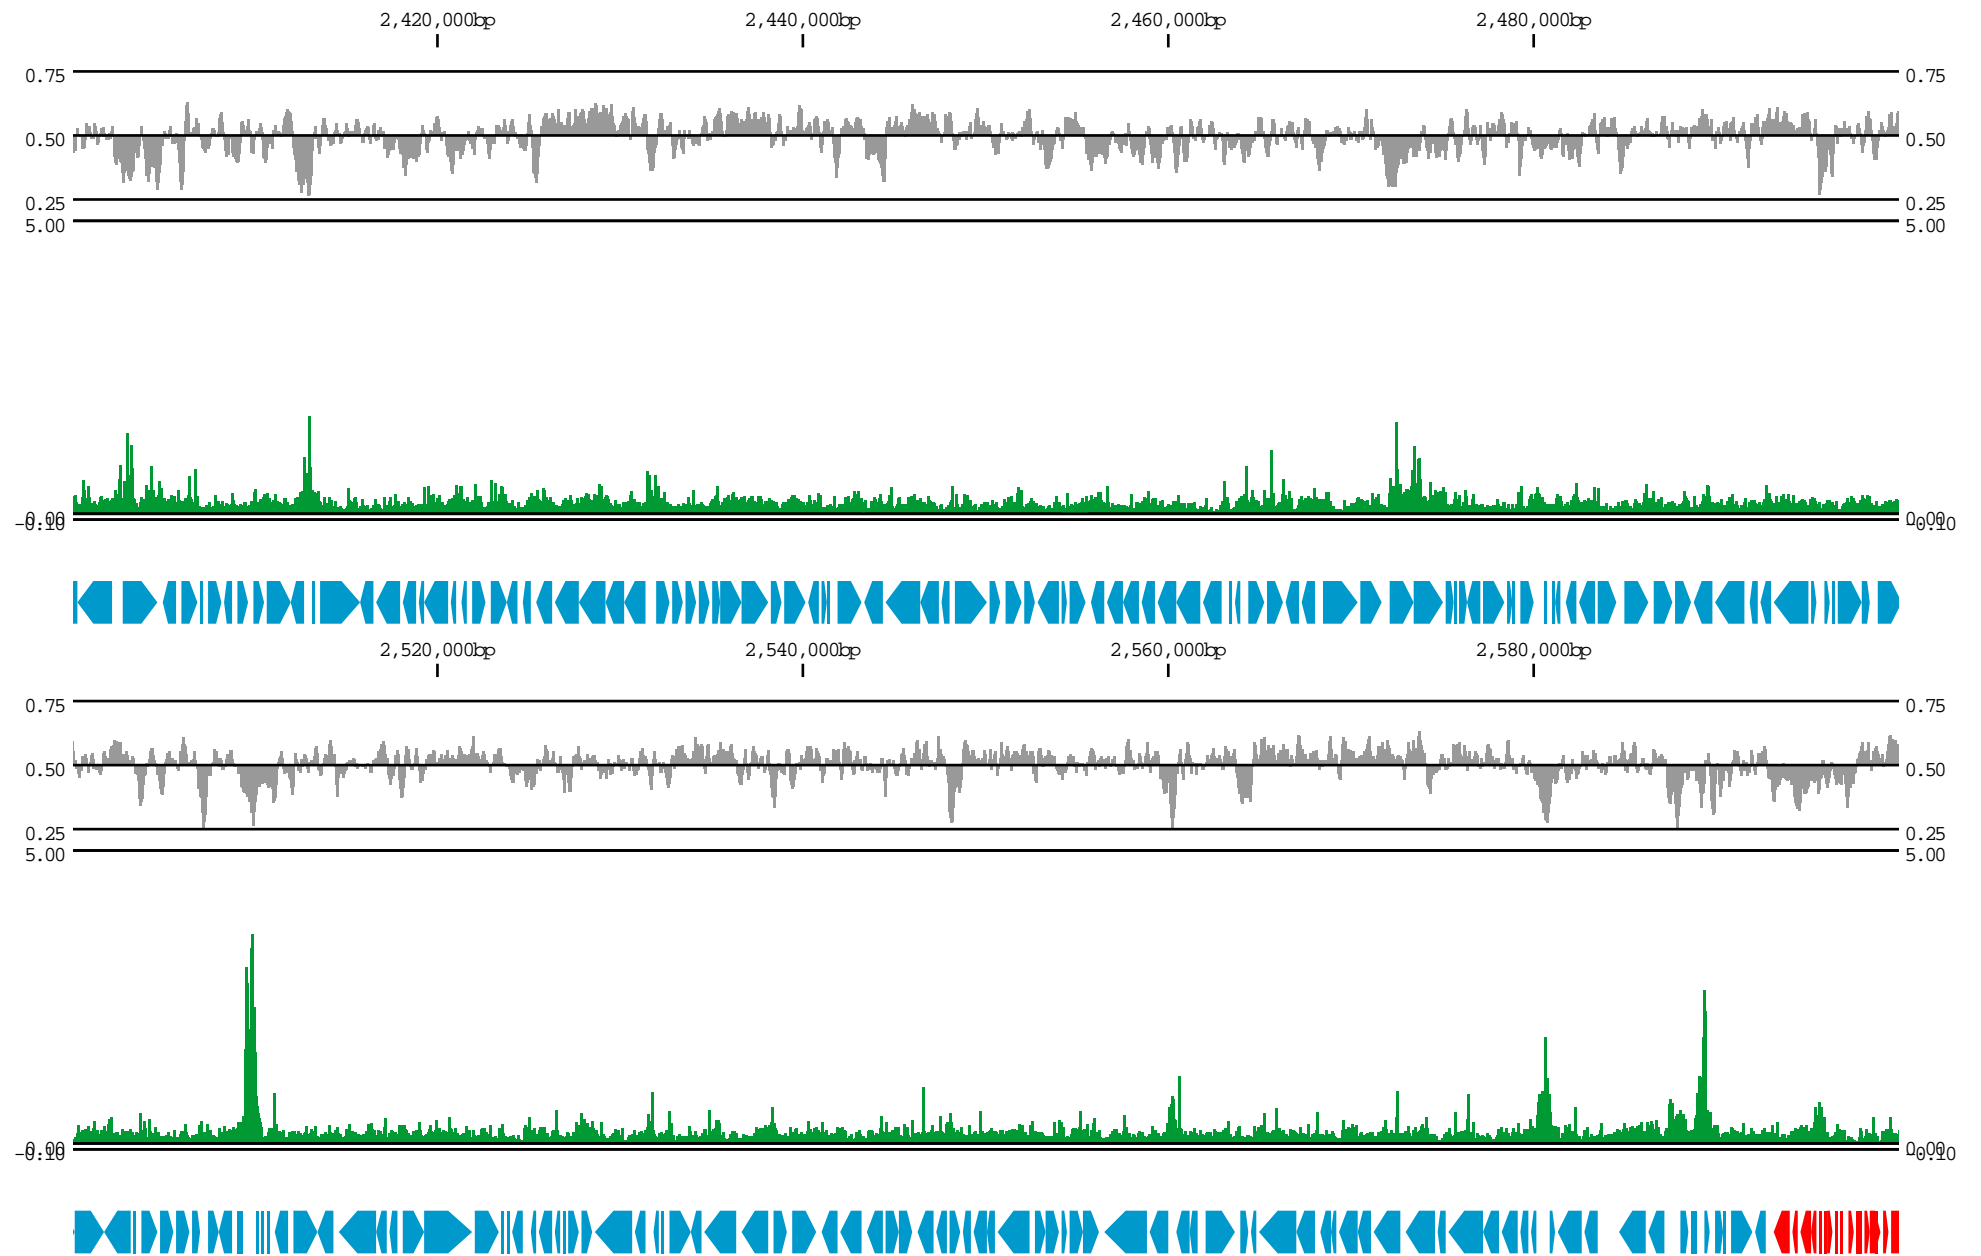

Fig. S2 (cont.)

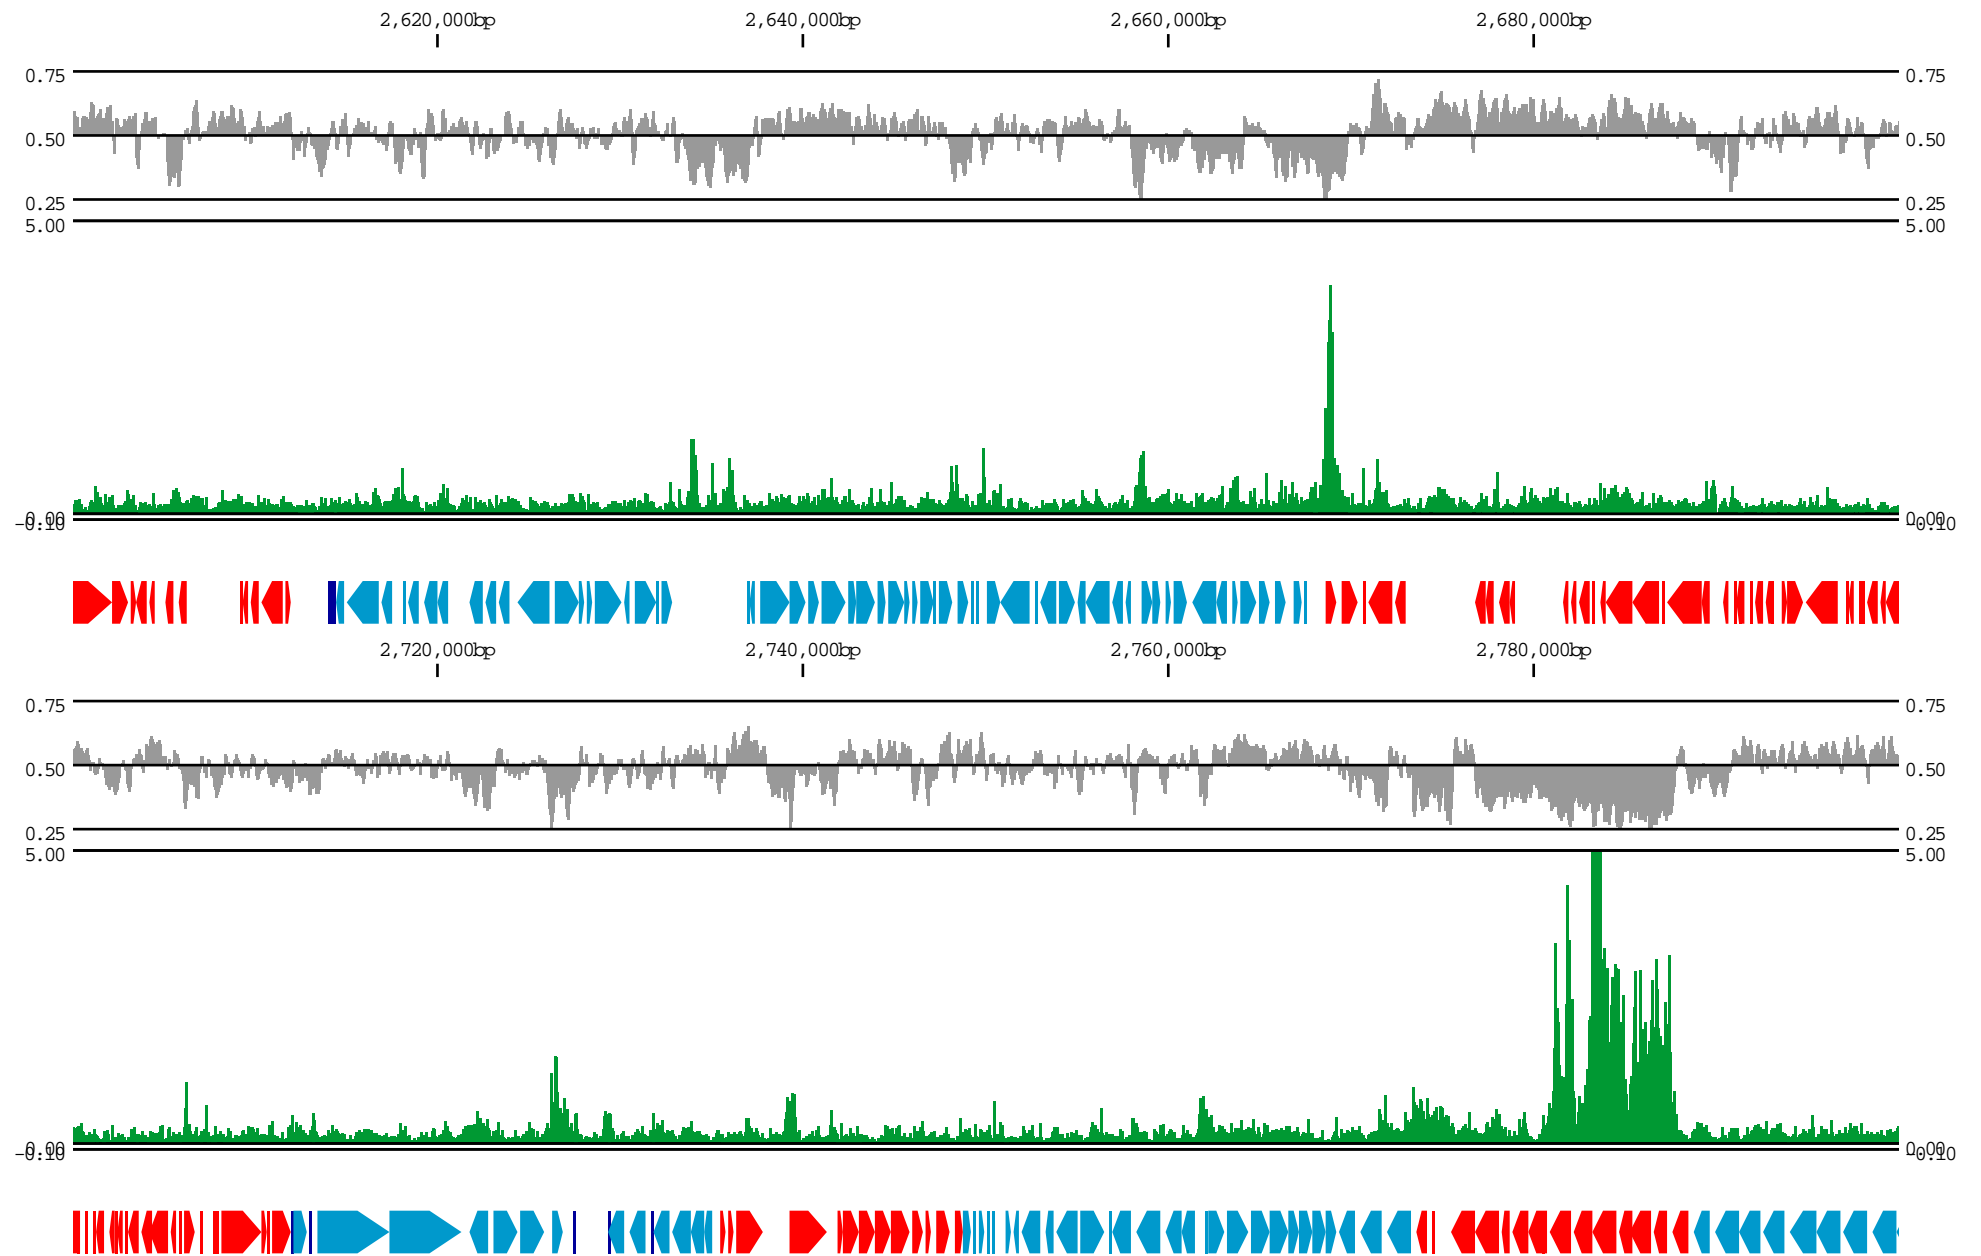

Fig. S2 (cont.)

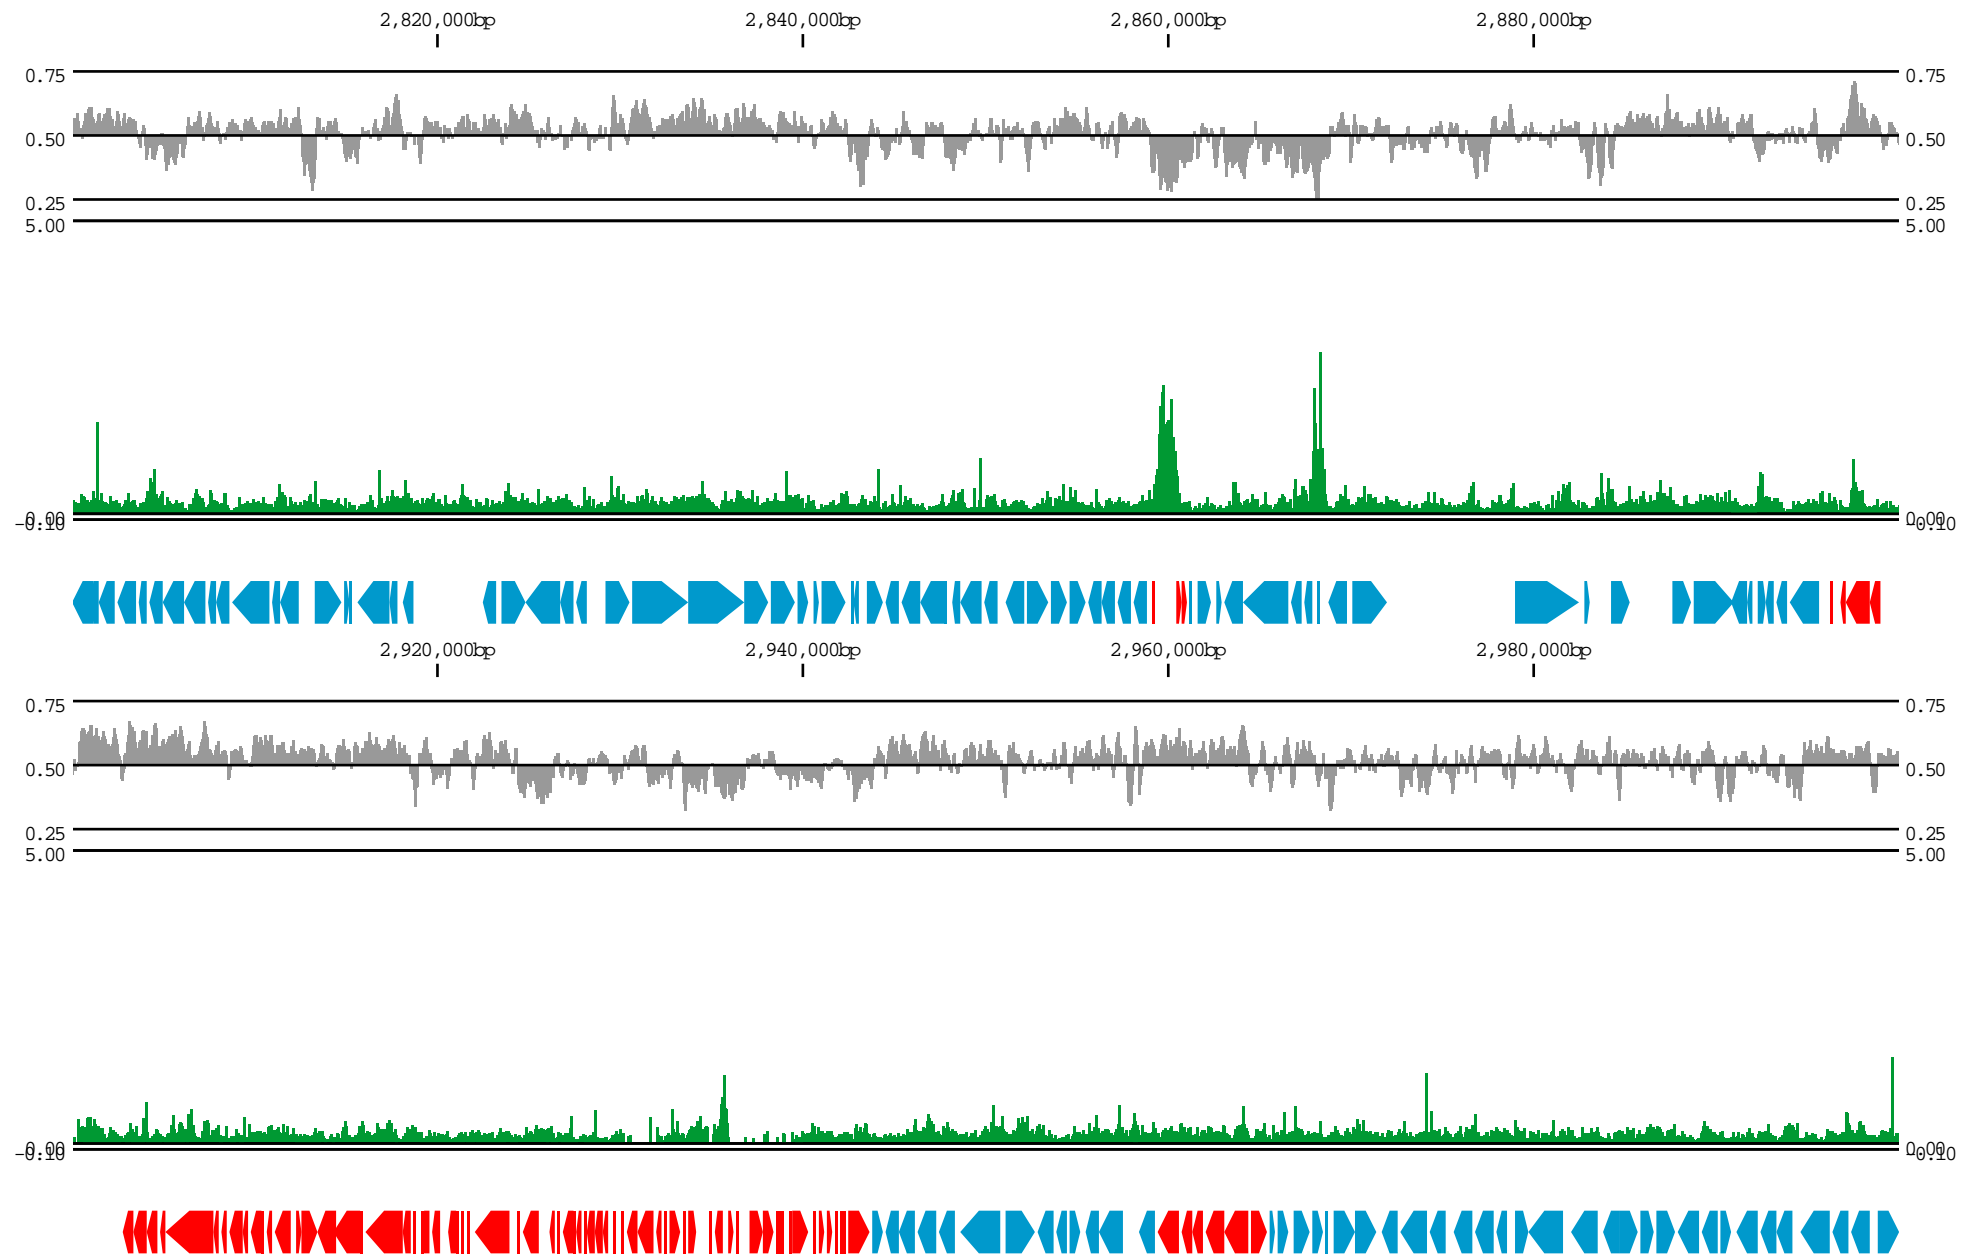

Fig. S2 (cont.)

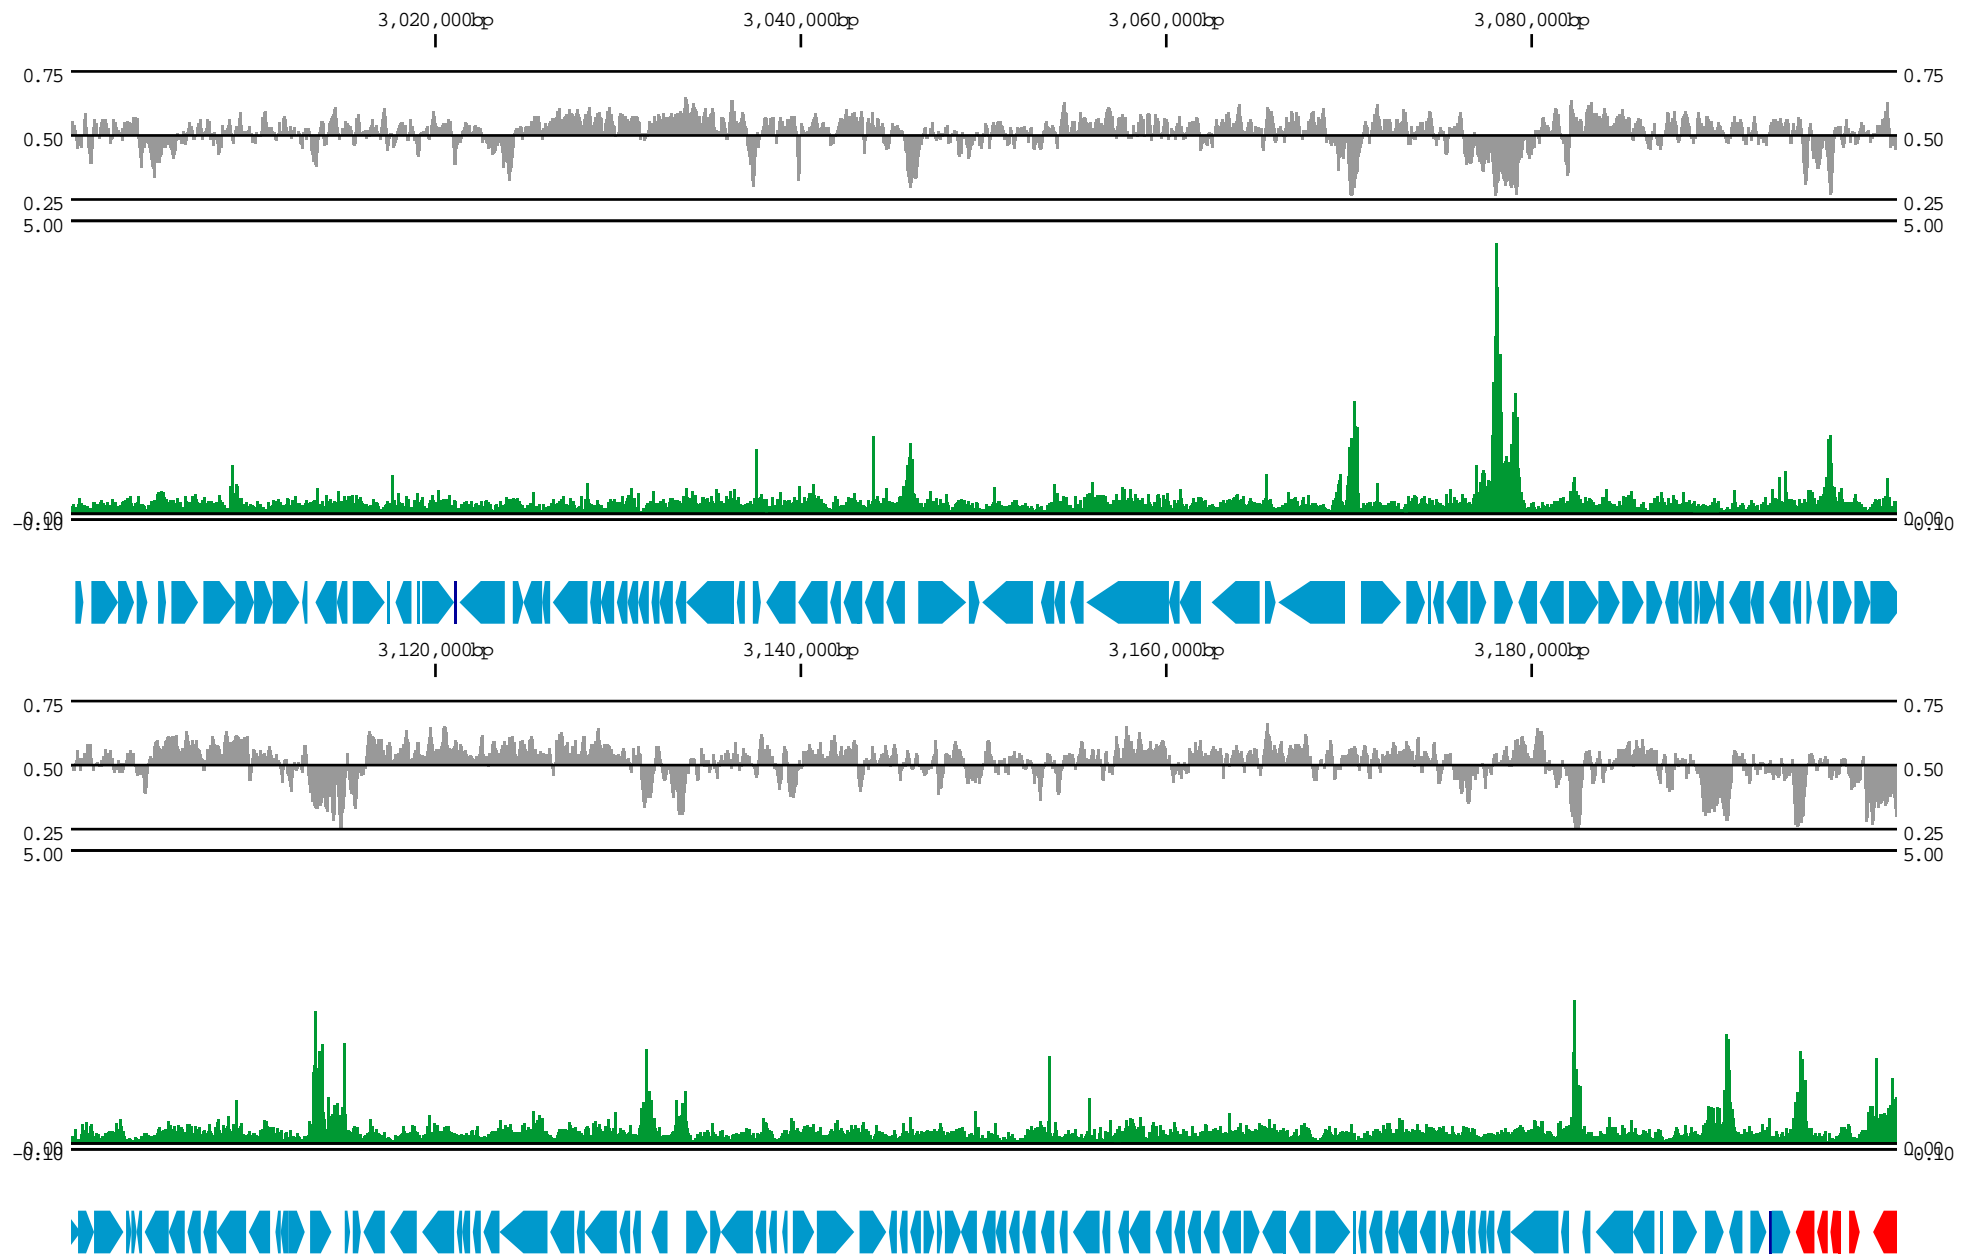

Fig. S2 (cont.)

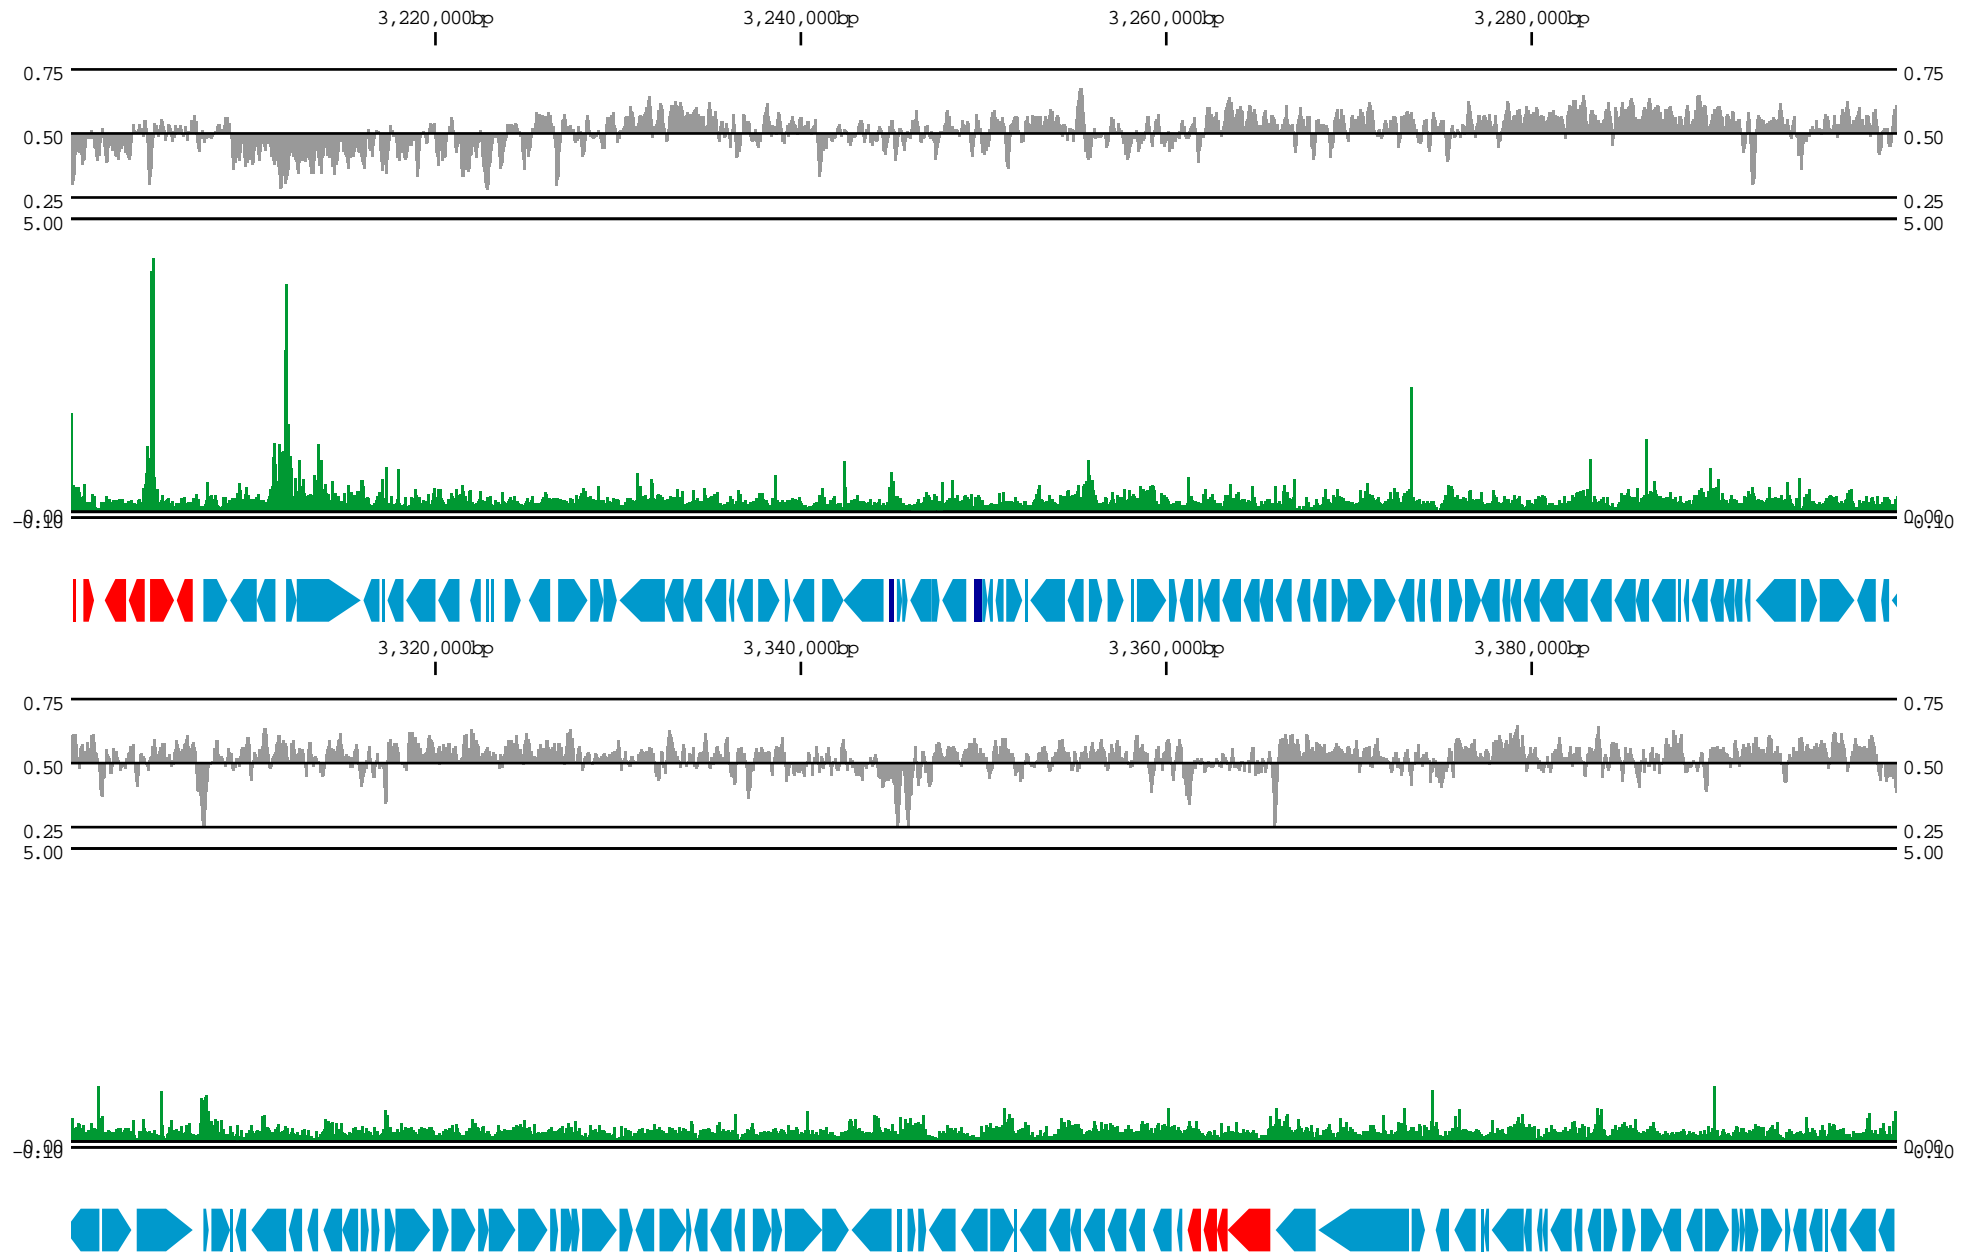

Fig. S2 (cont.)

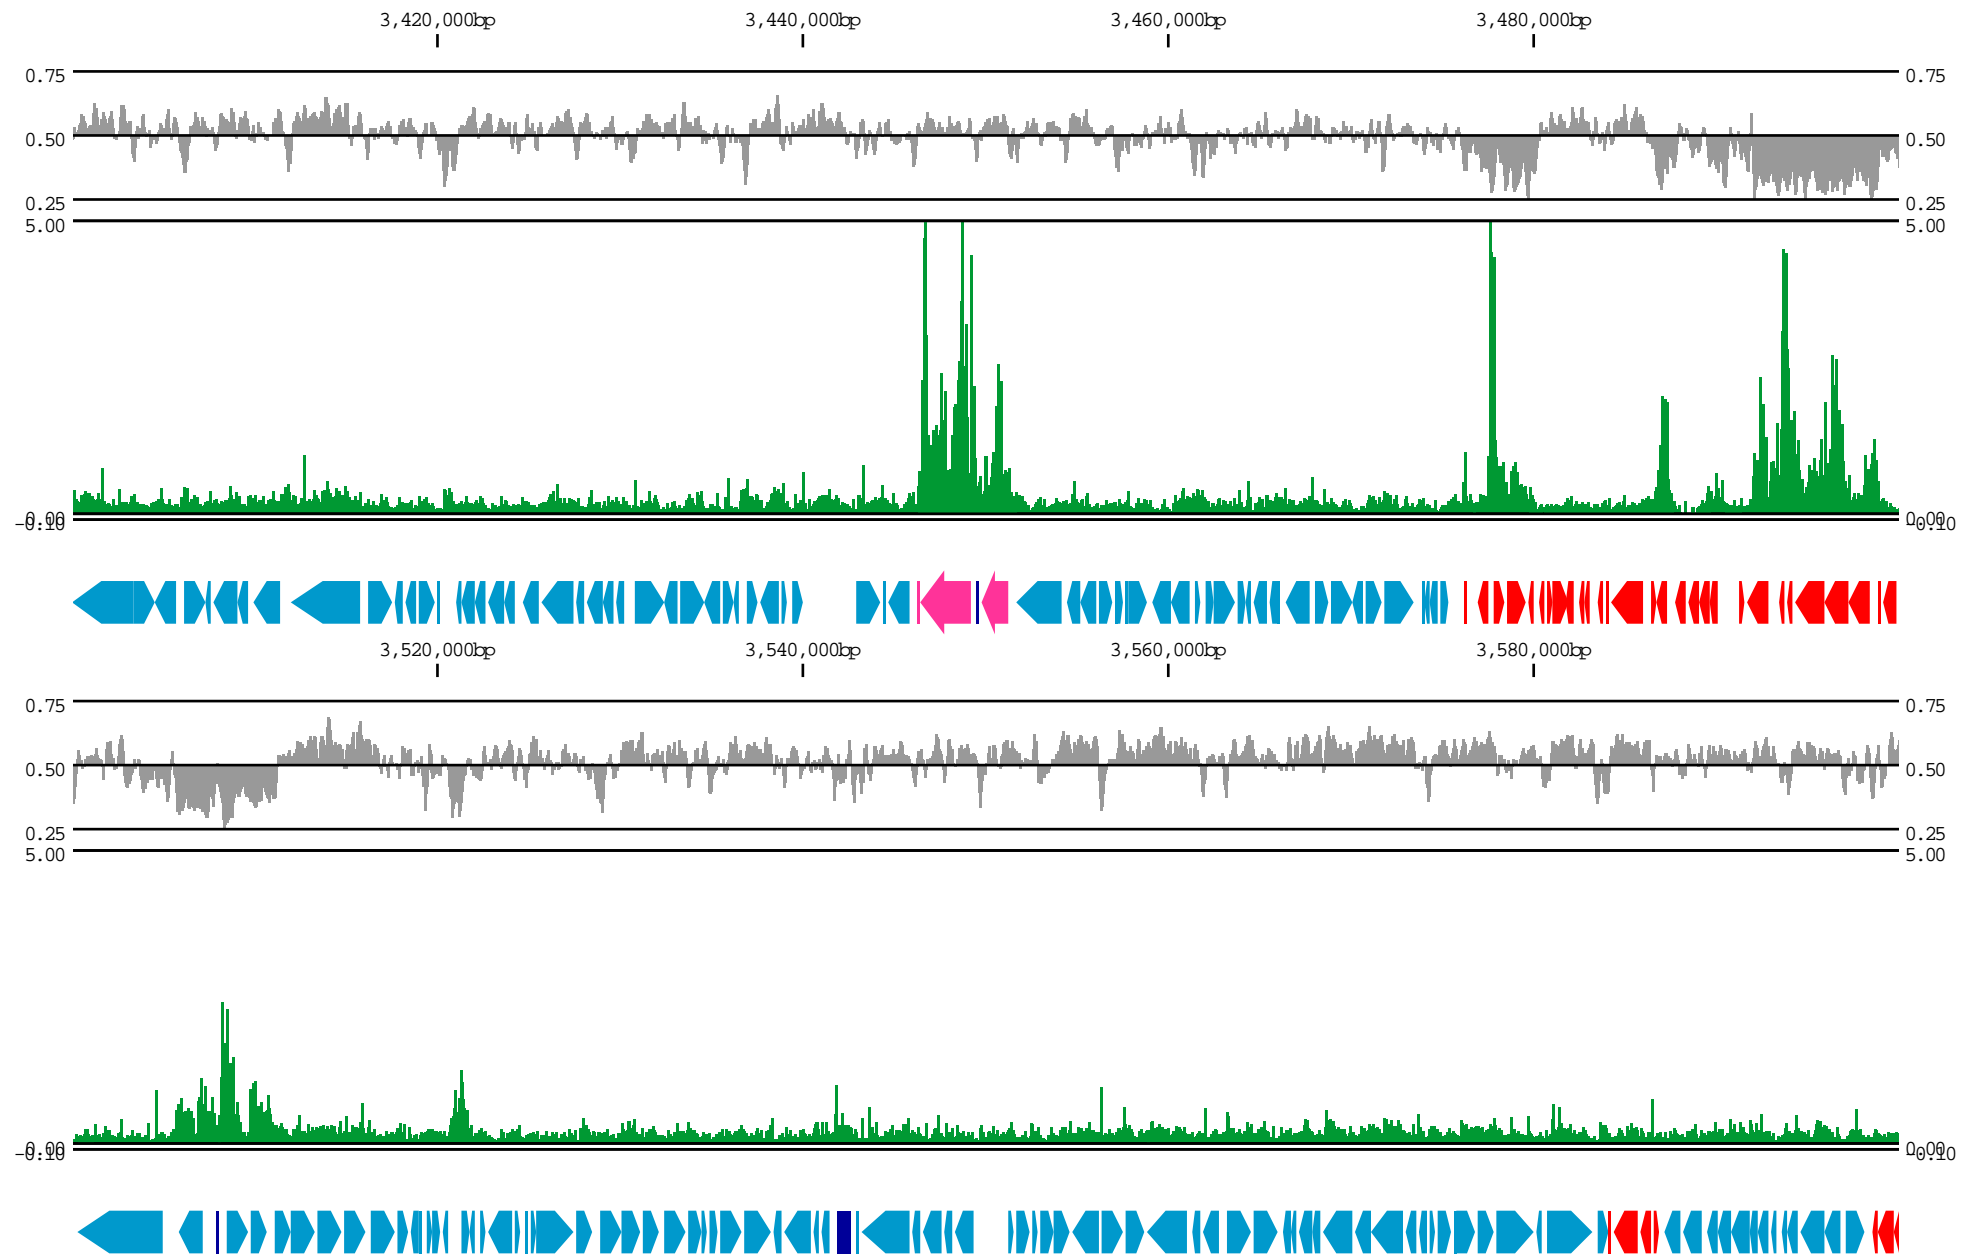

Fig. S2 (cont.)

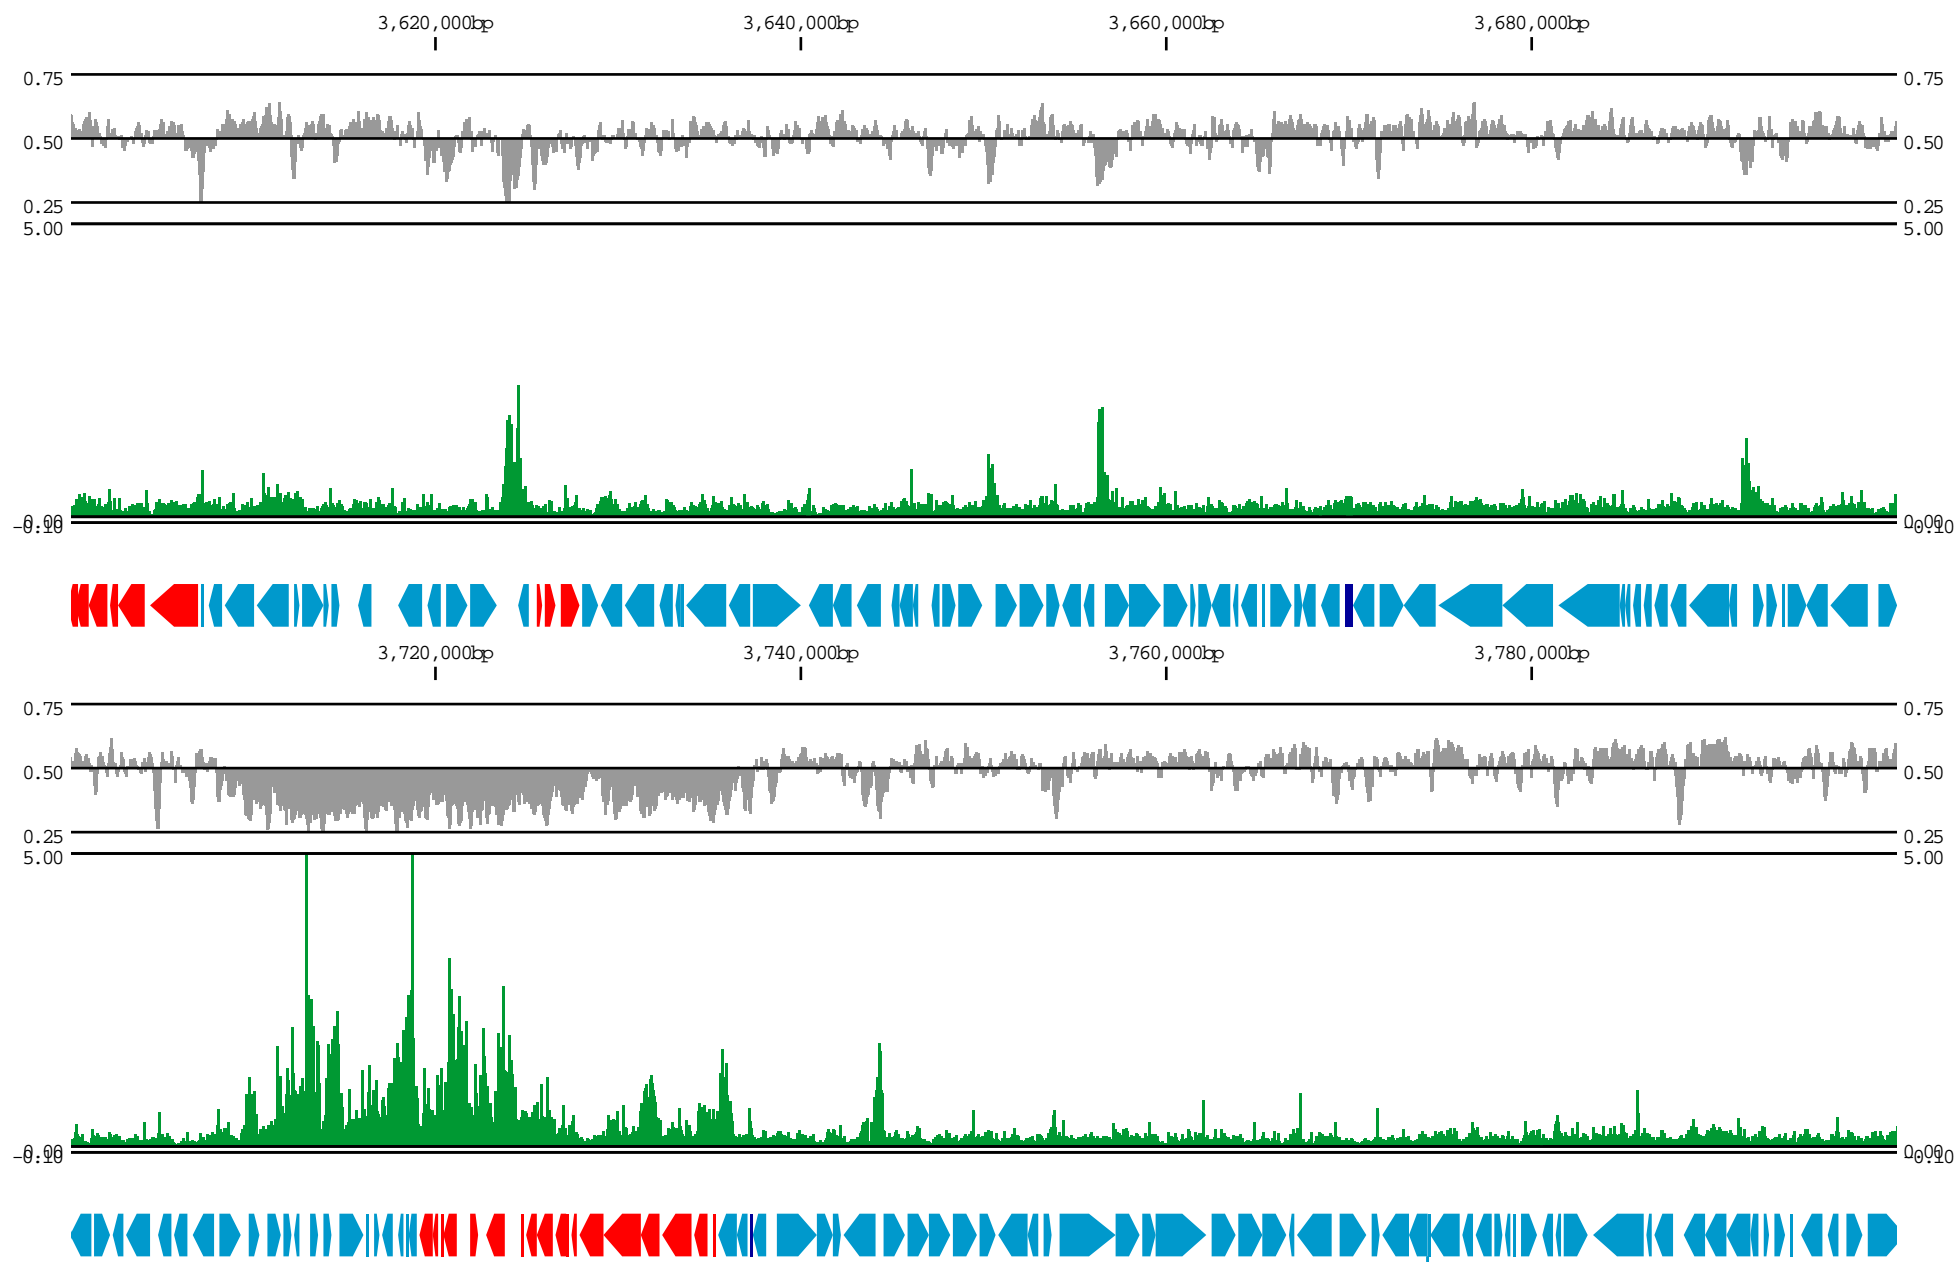



Fig. S2 (cont.)

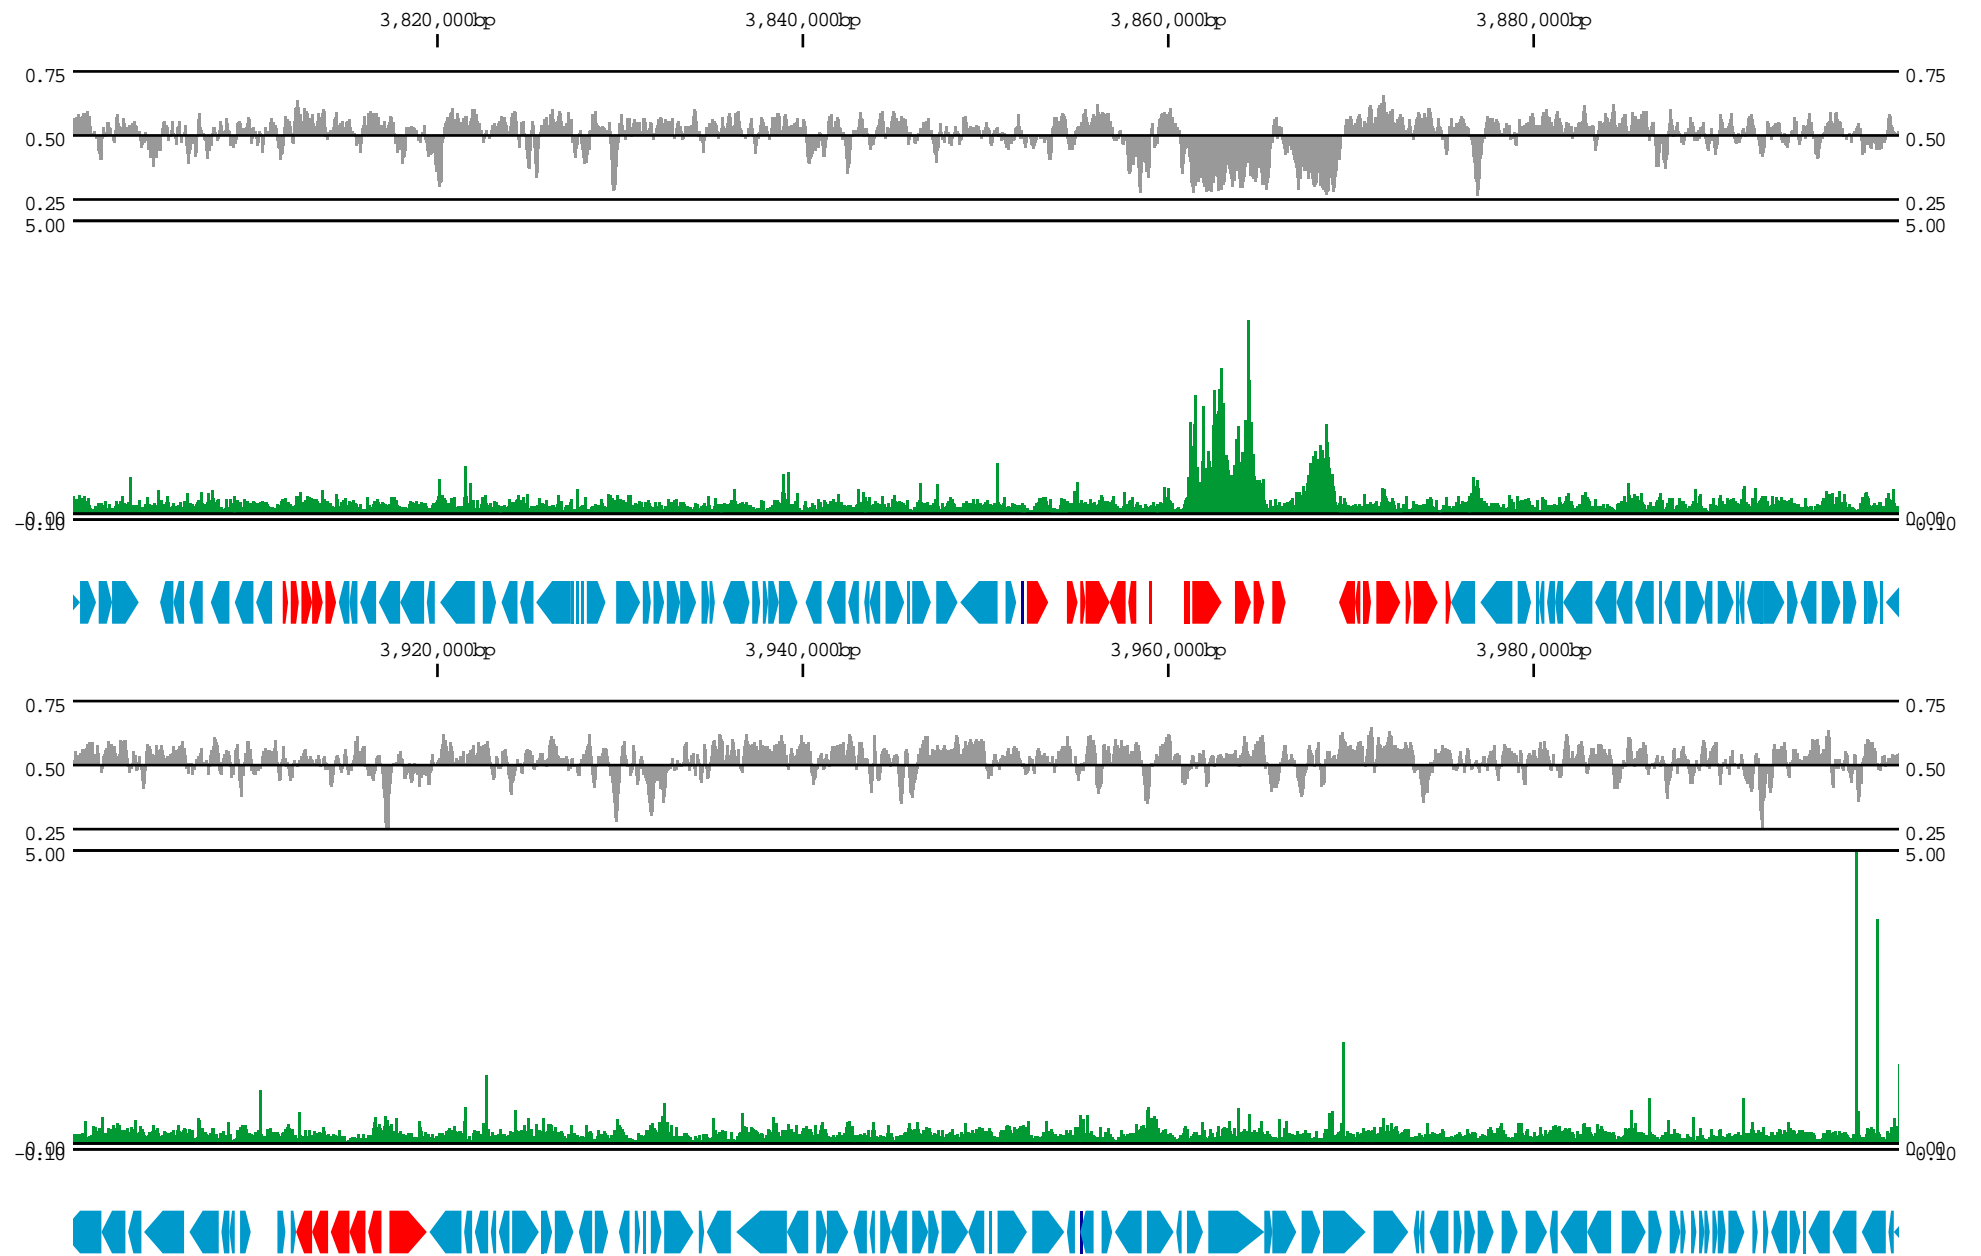

Fig. S2 (cont.)

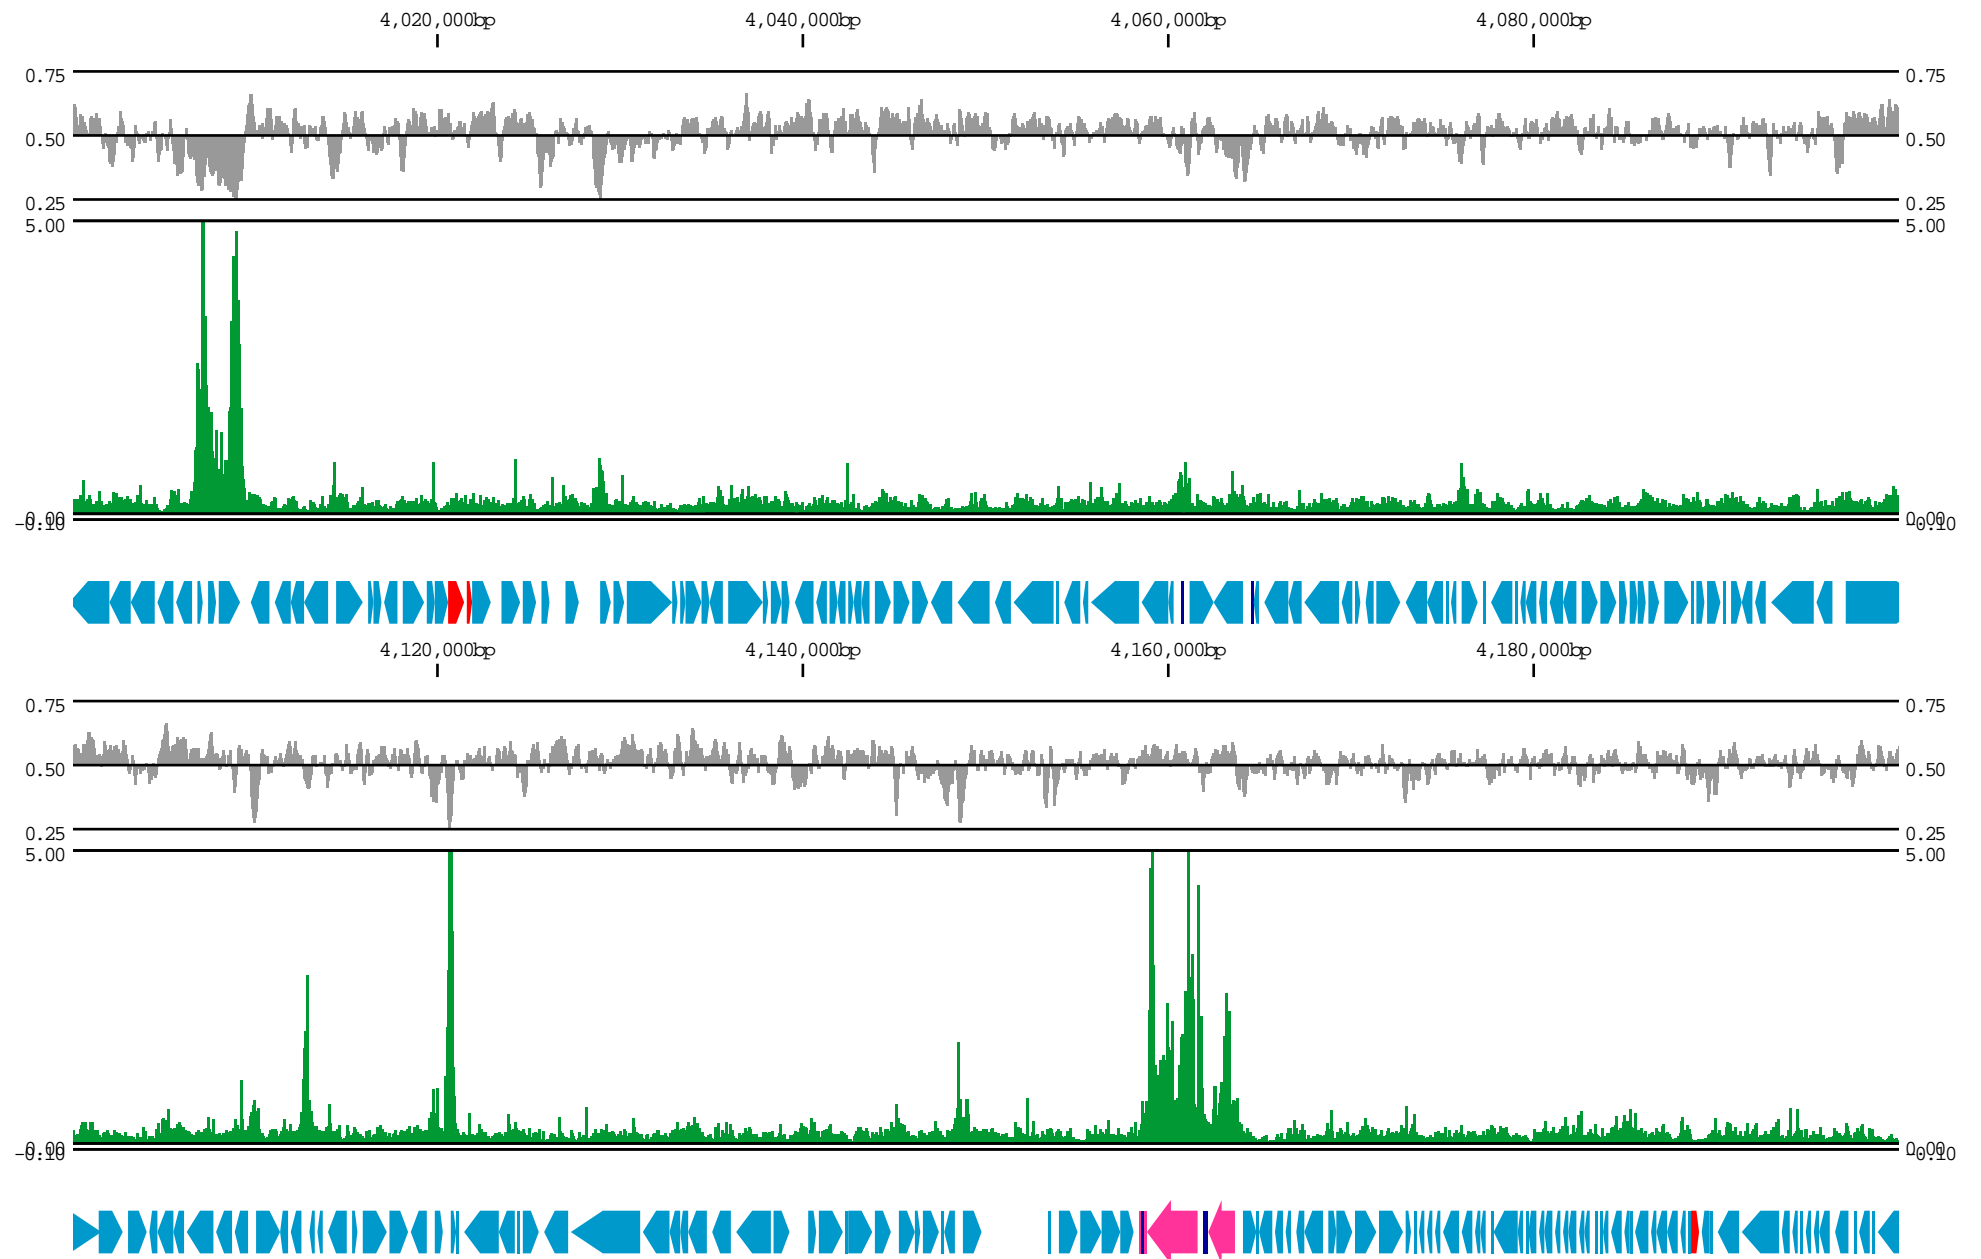

Fig. S2 (cont.)

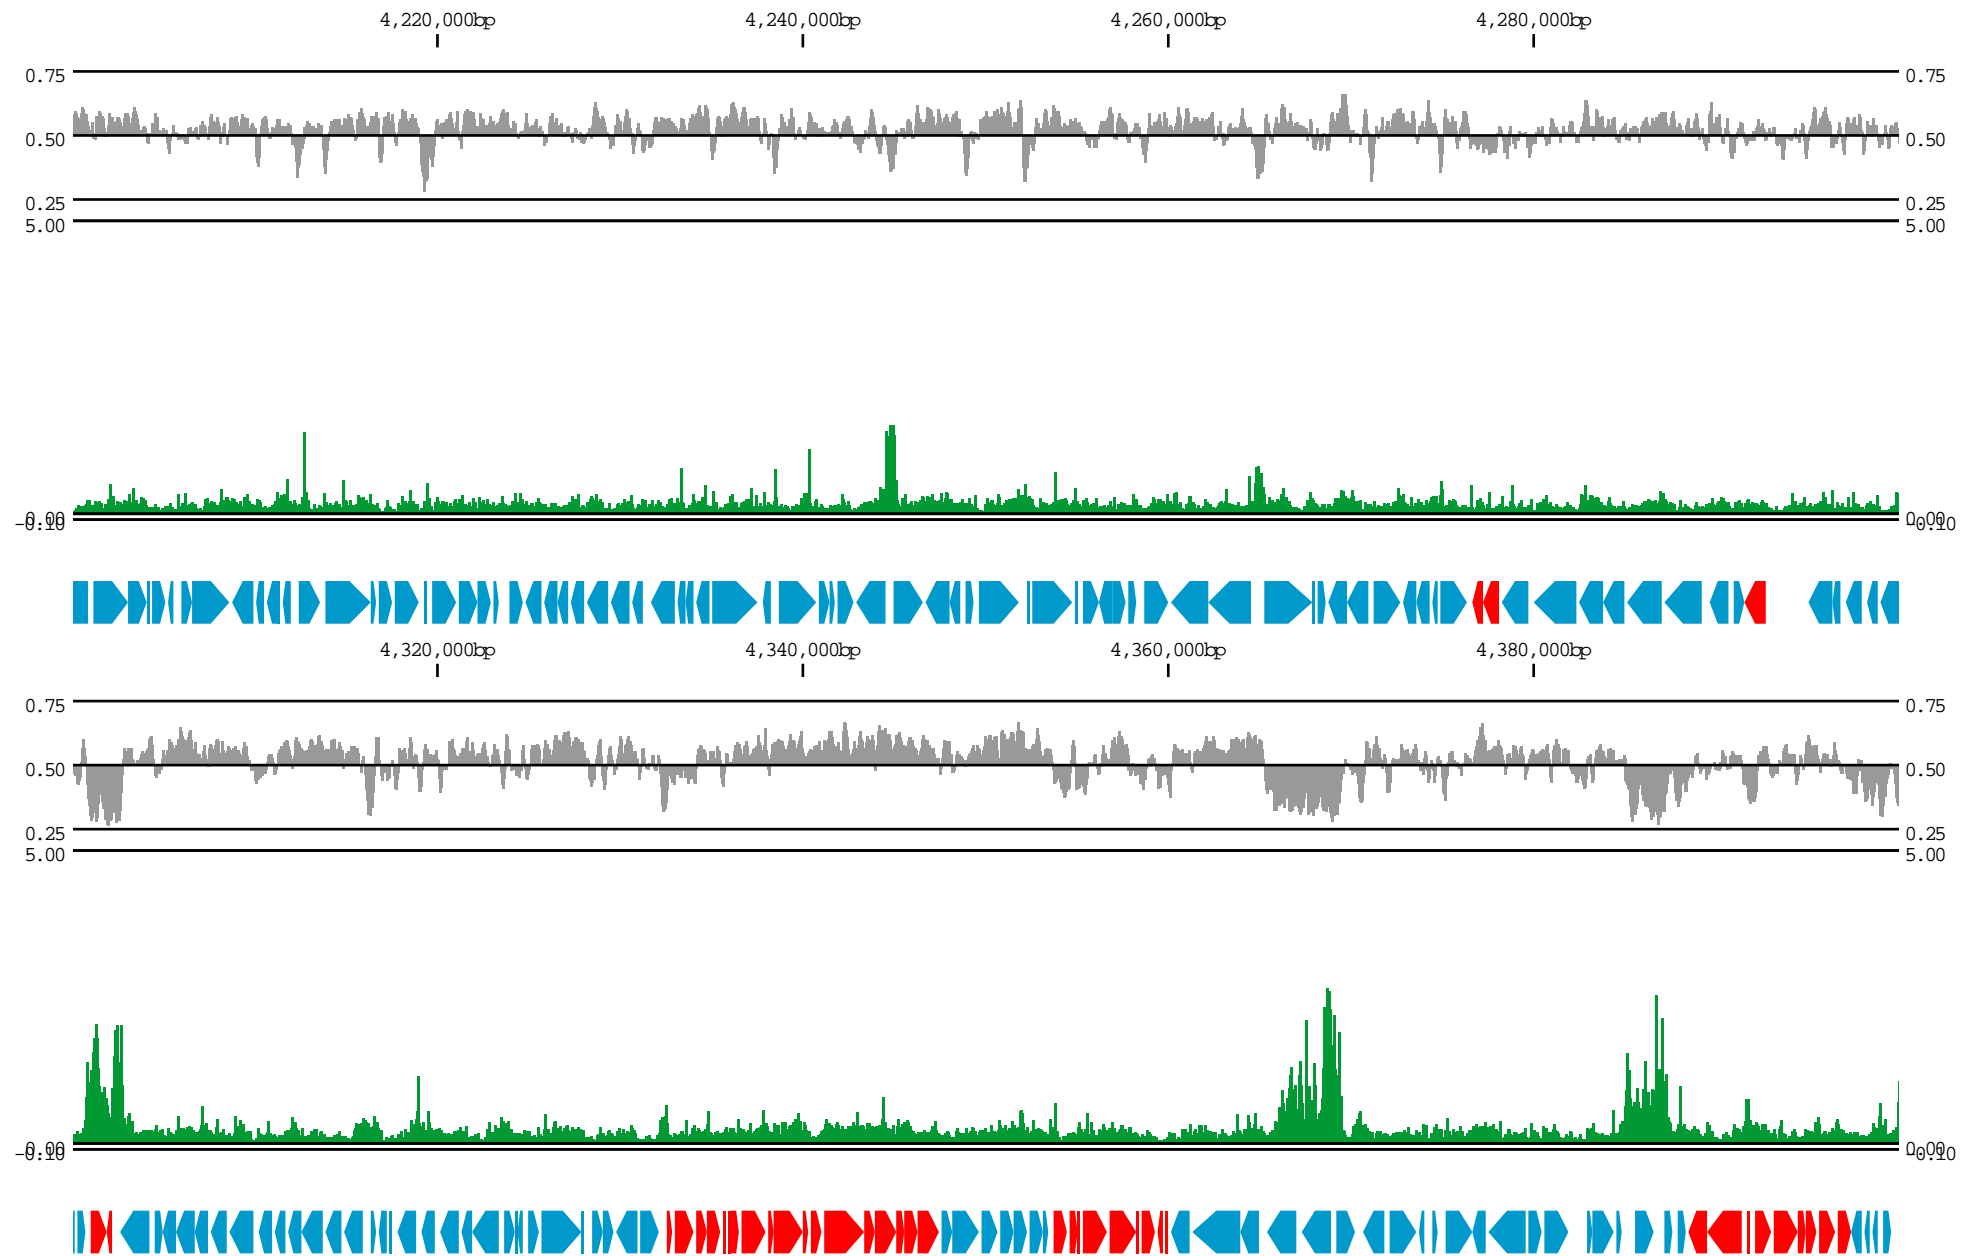

Fig. S2 (cont.)

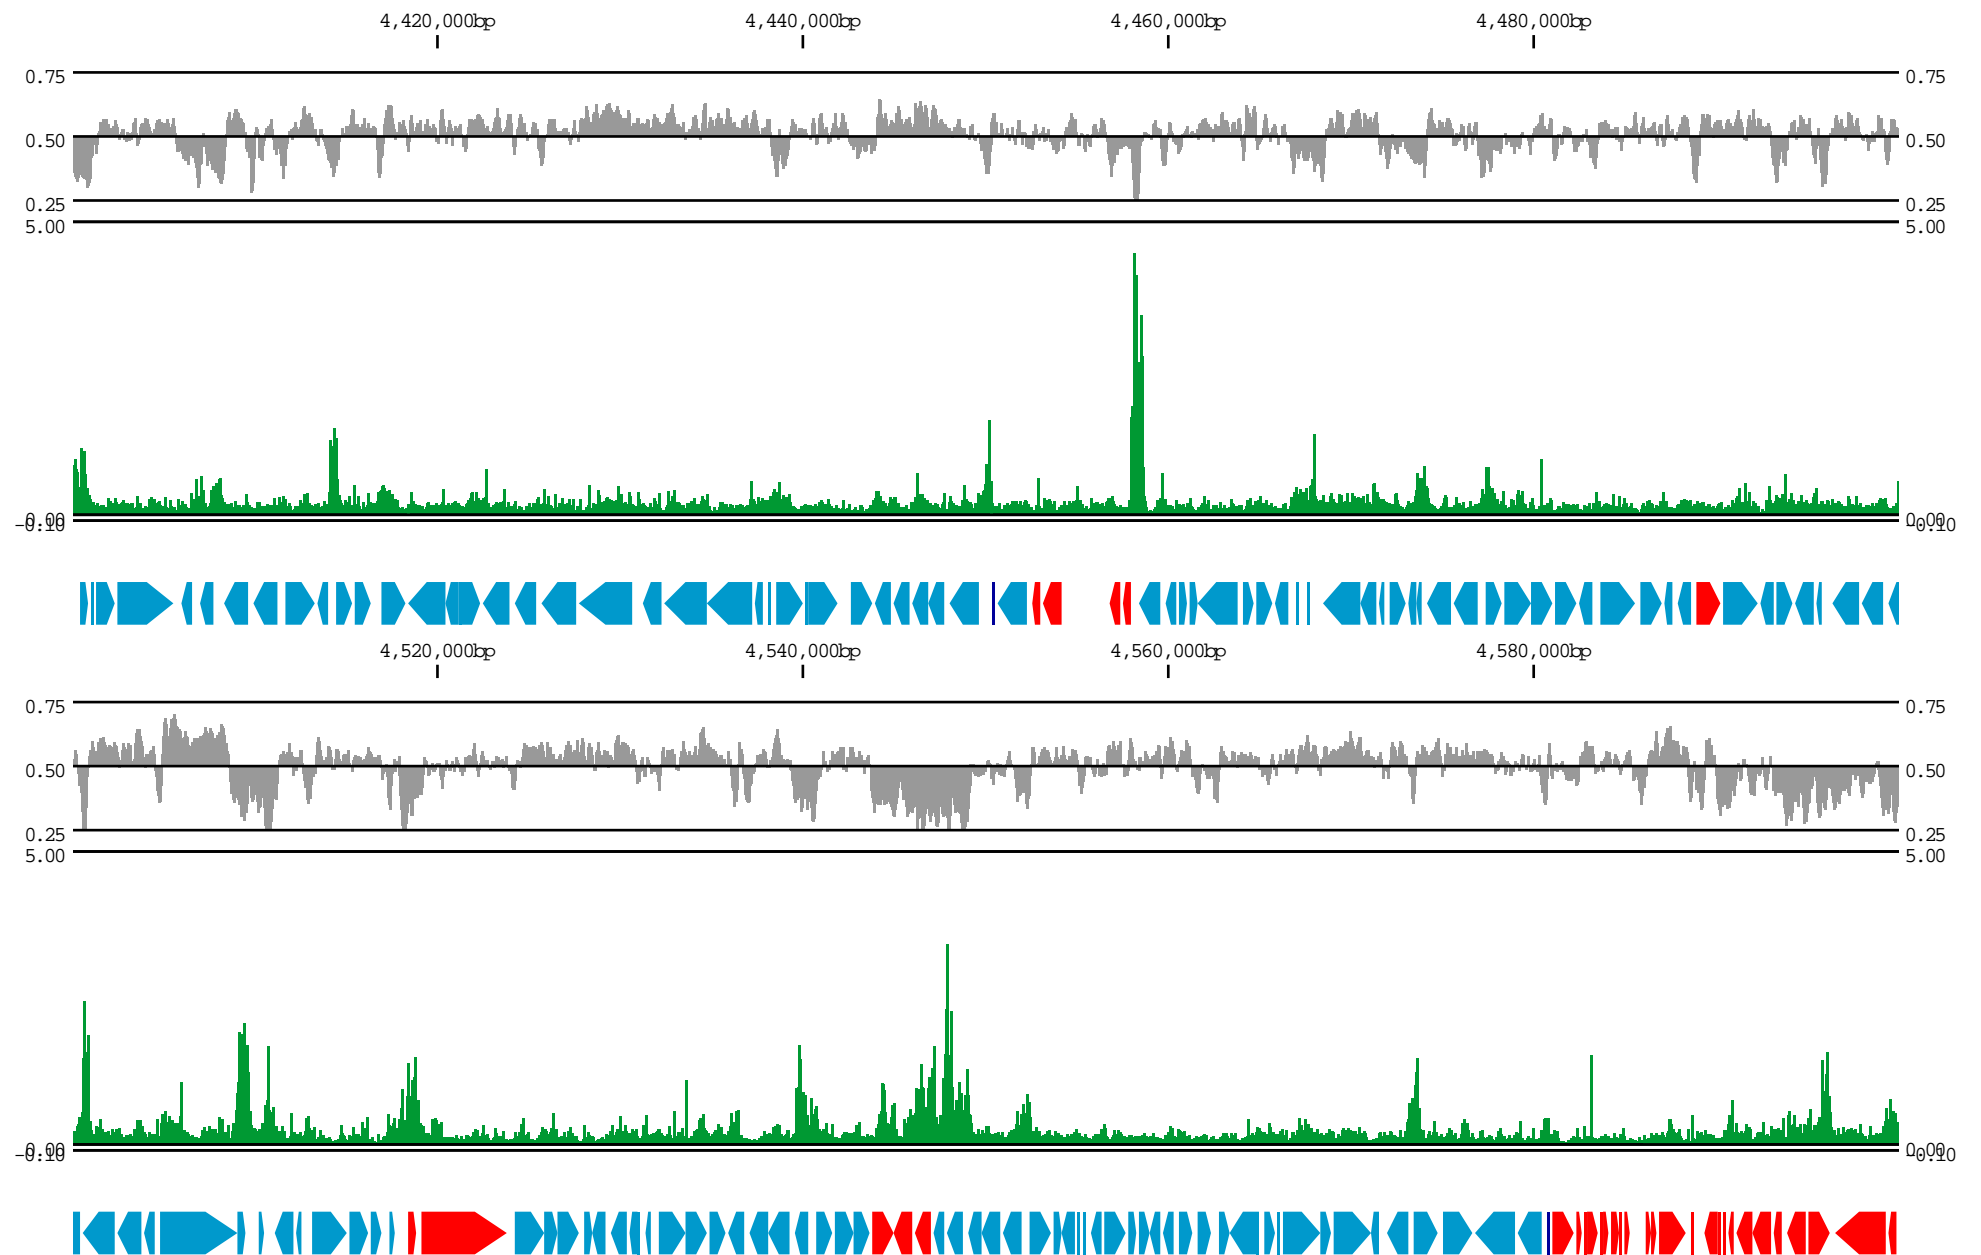

Fig. S2 (cont.)

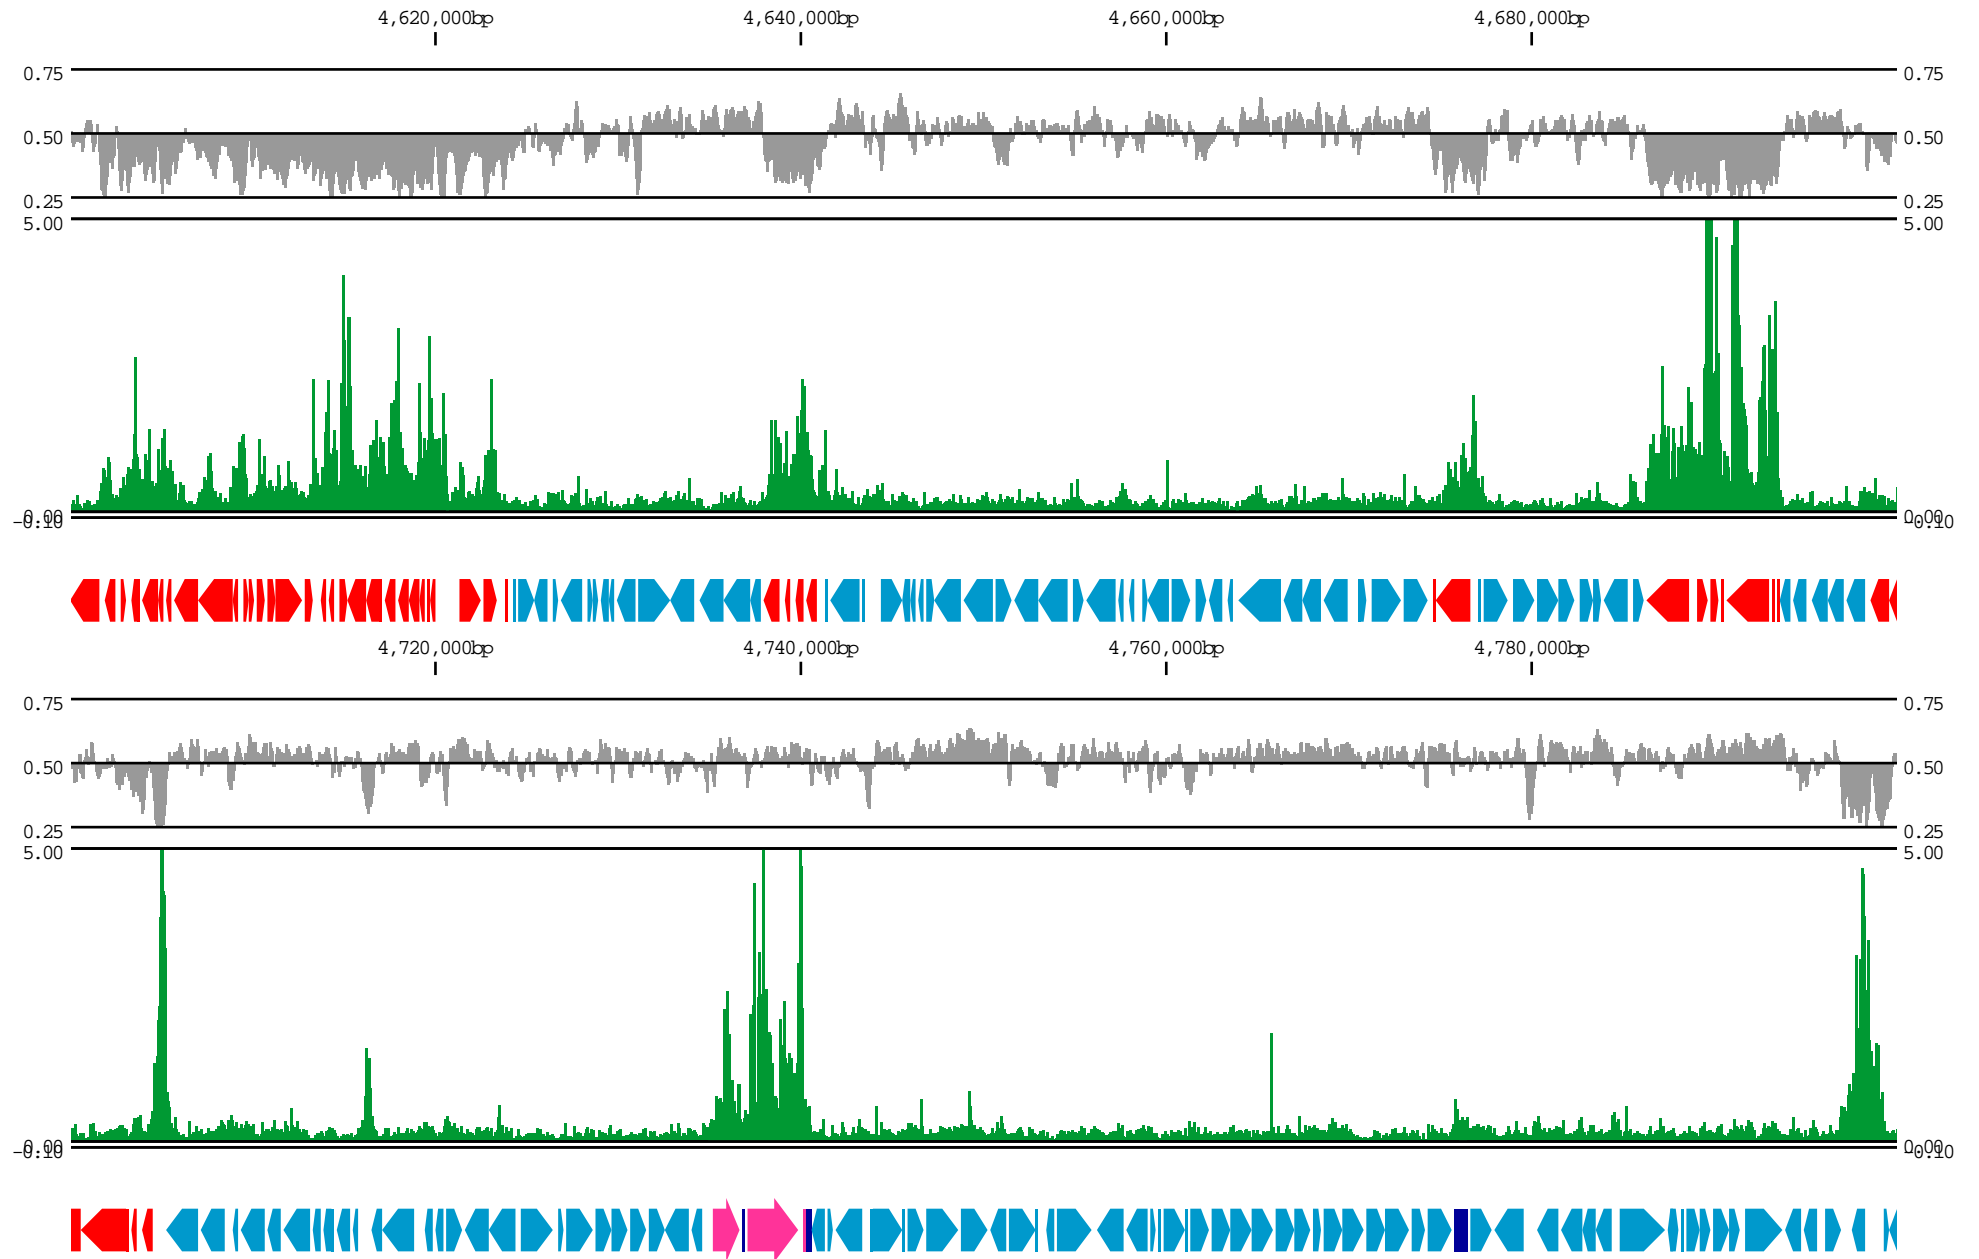

Fig. S2 (cont.)

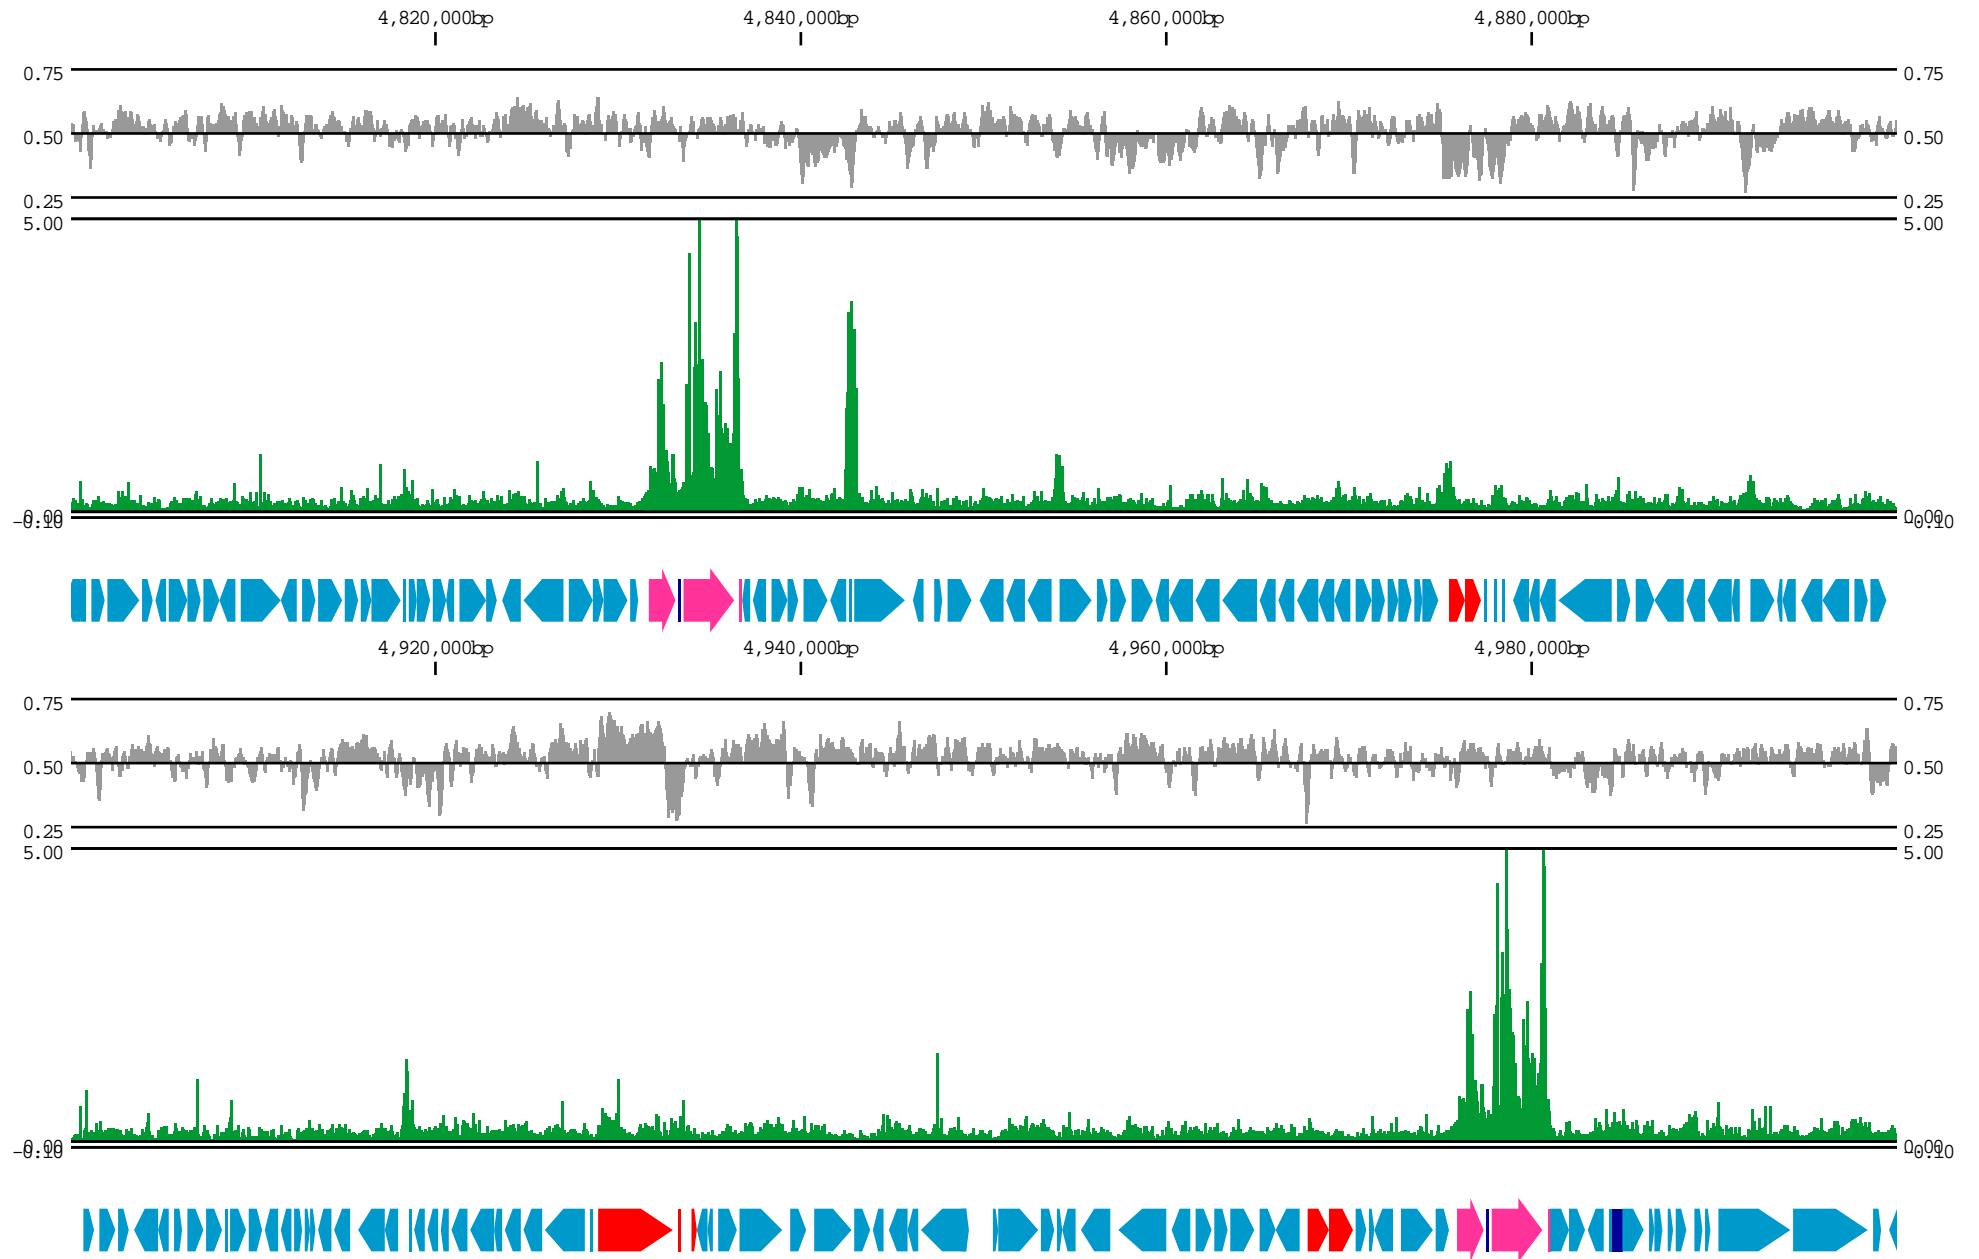

Fig. S2 (cont.)

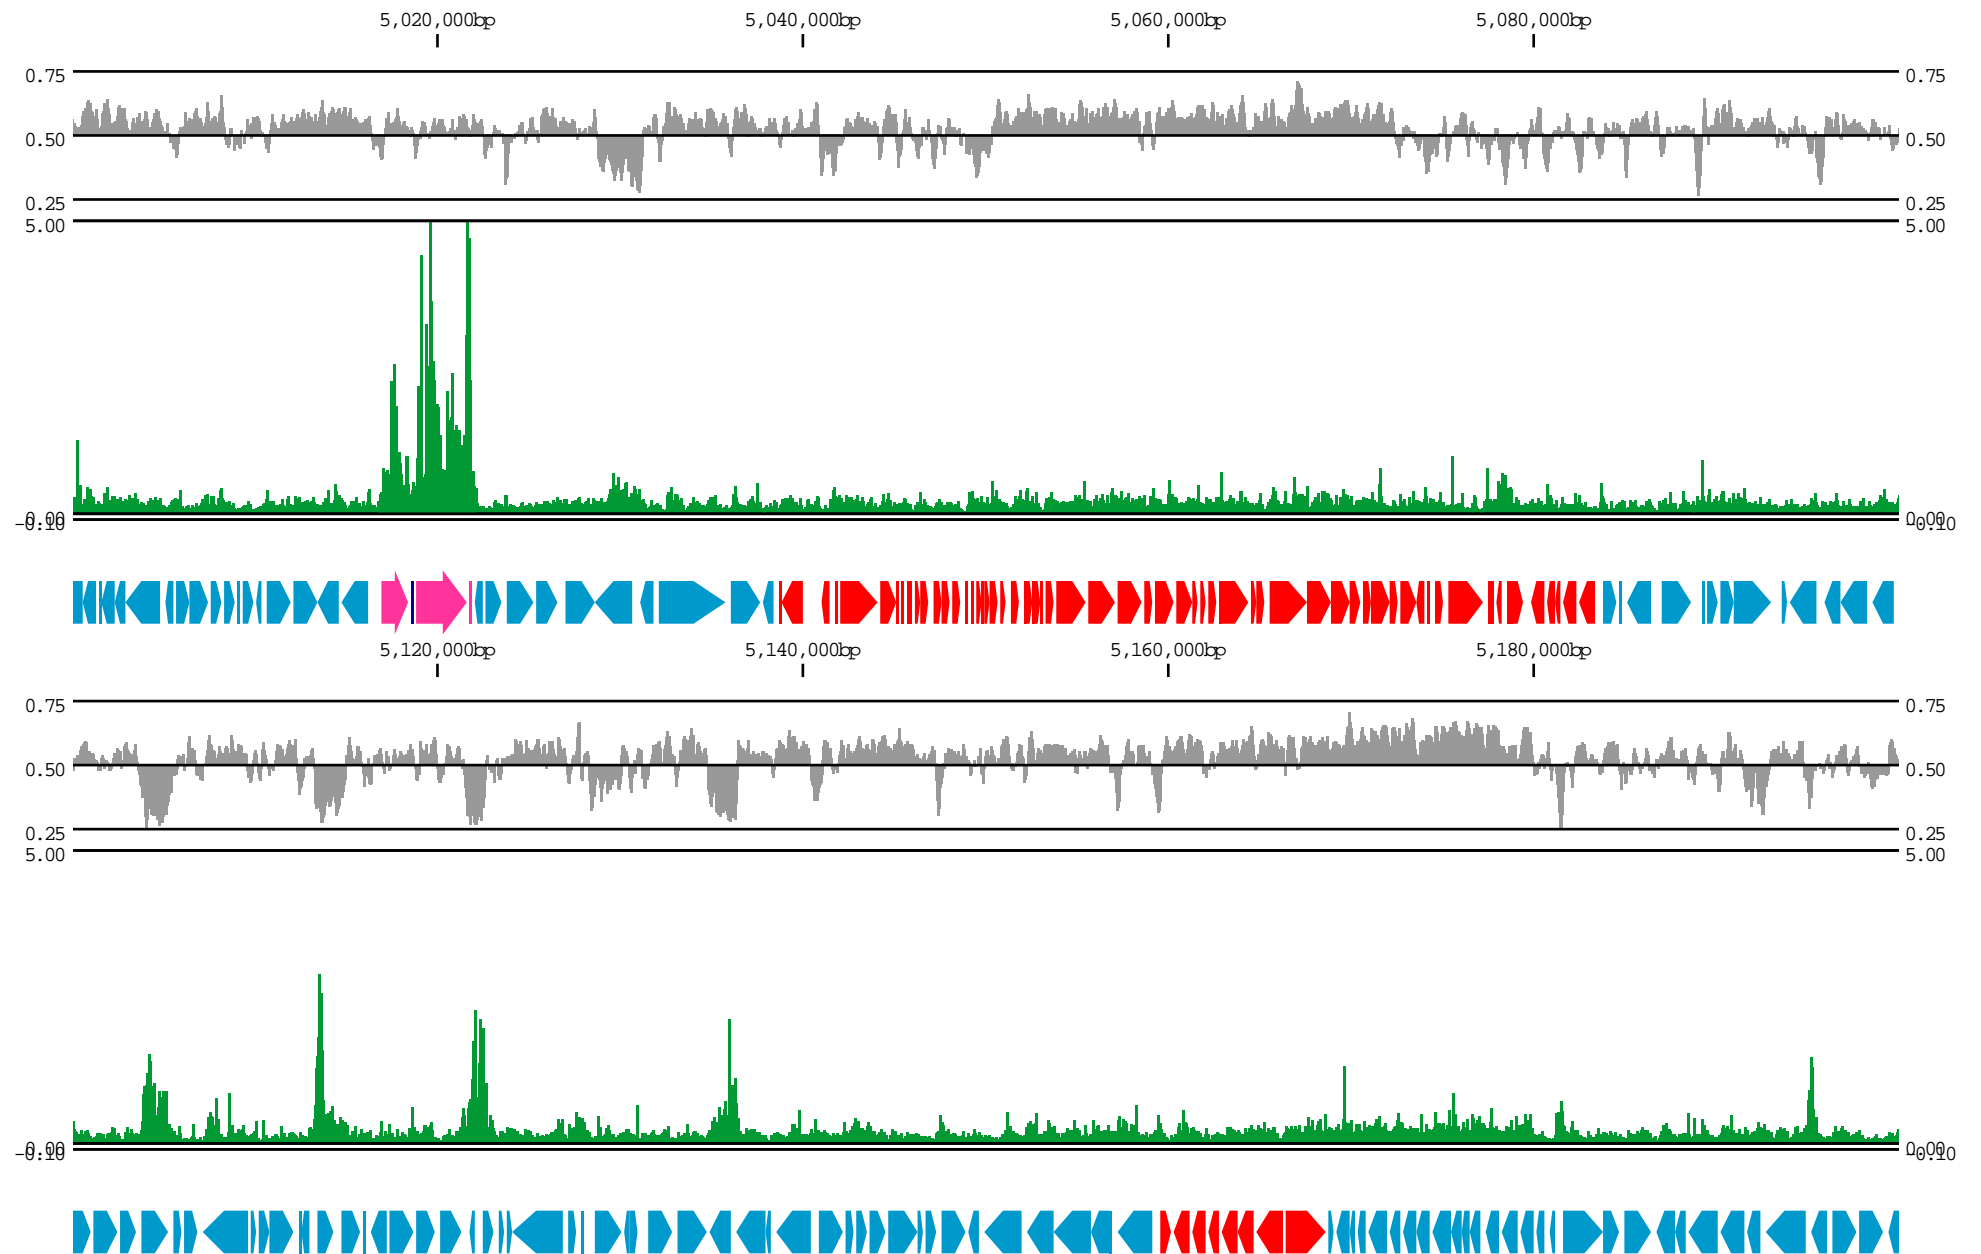

Fig. S2 (cont.)

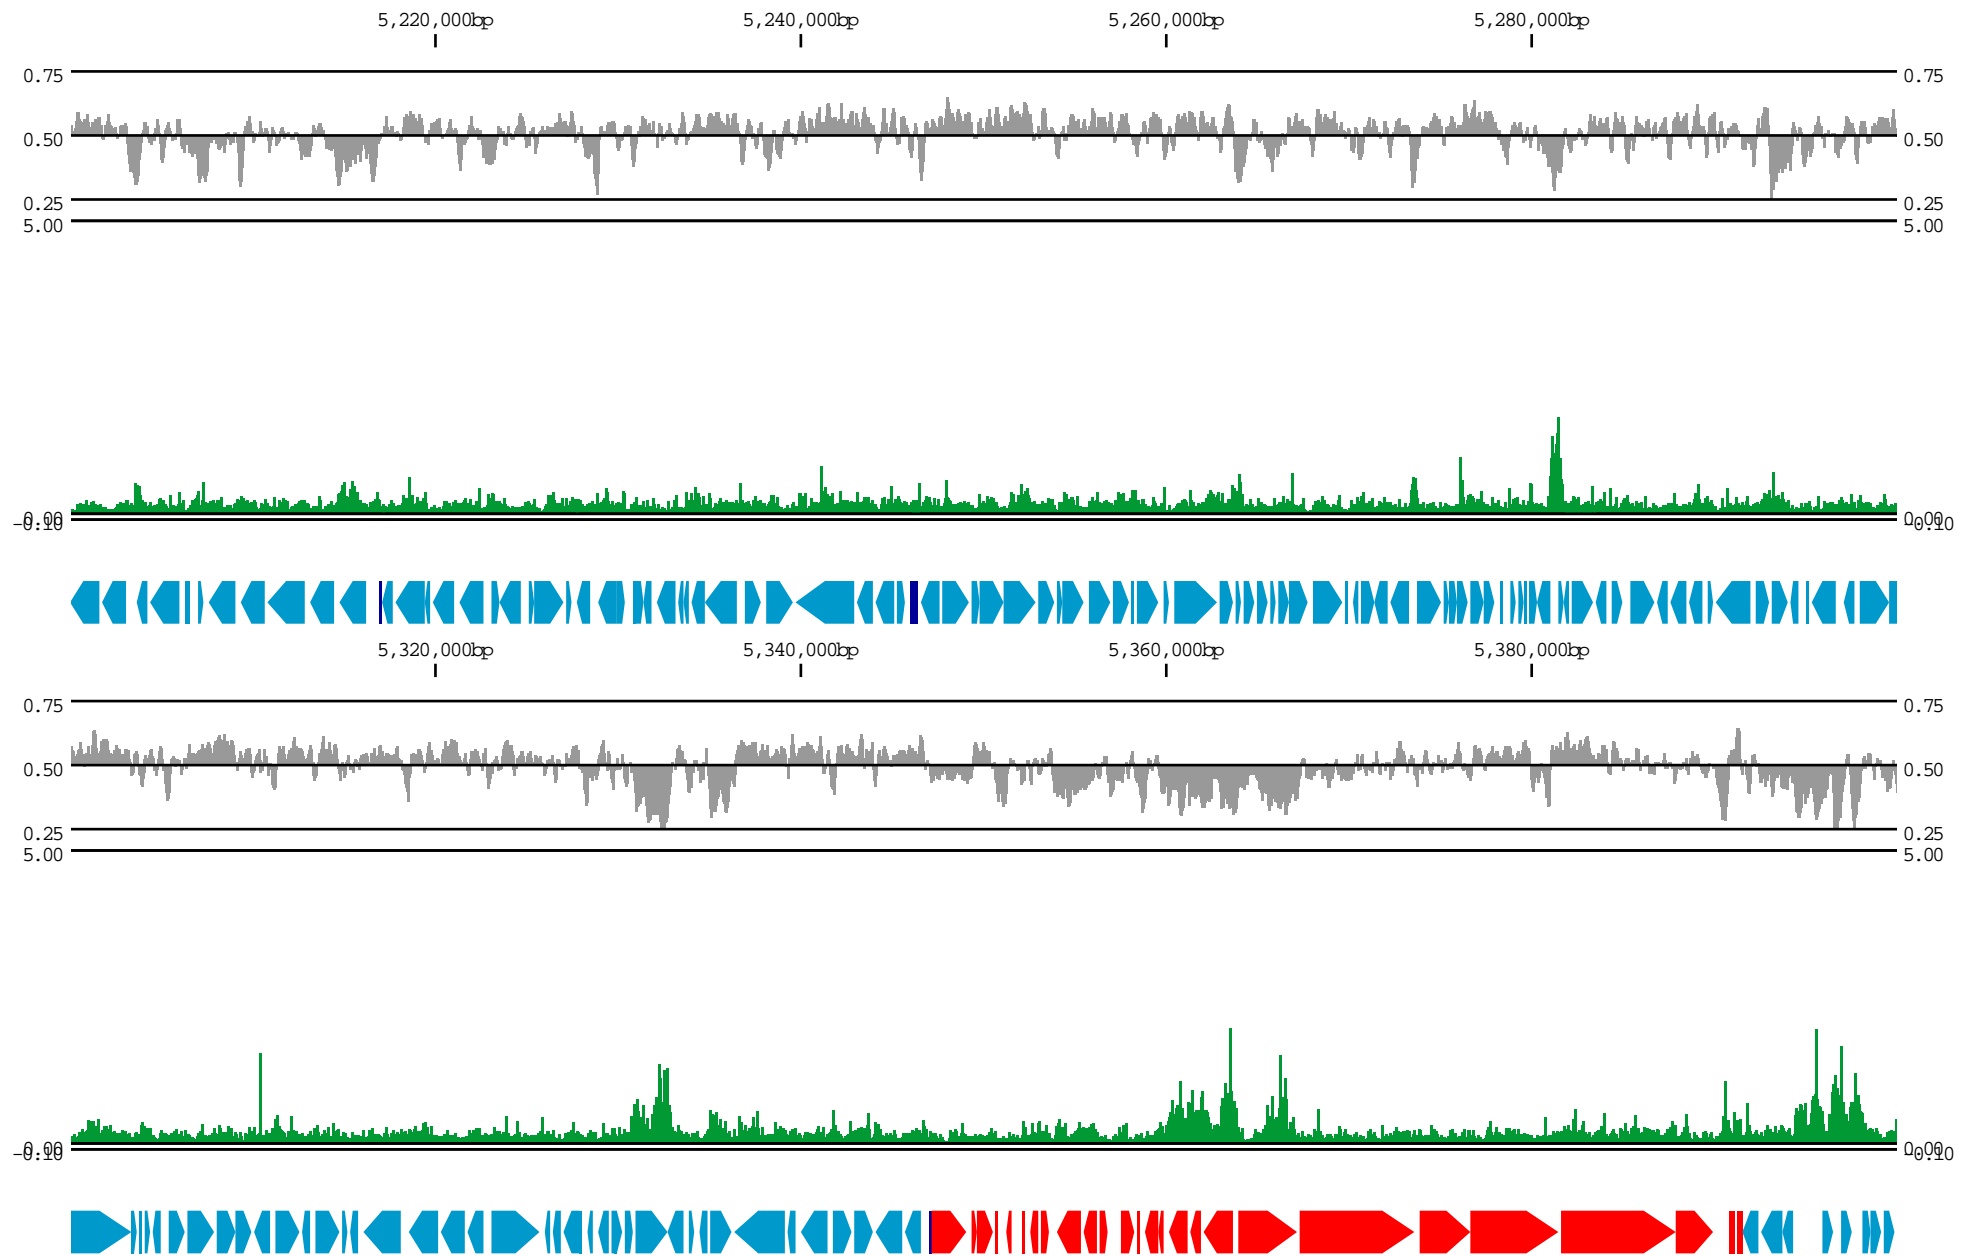



Fig. S2 (cont.)

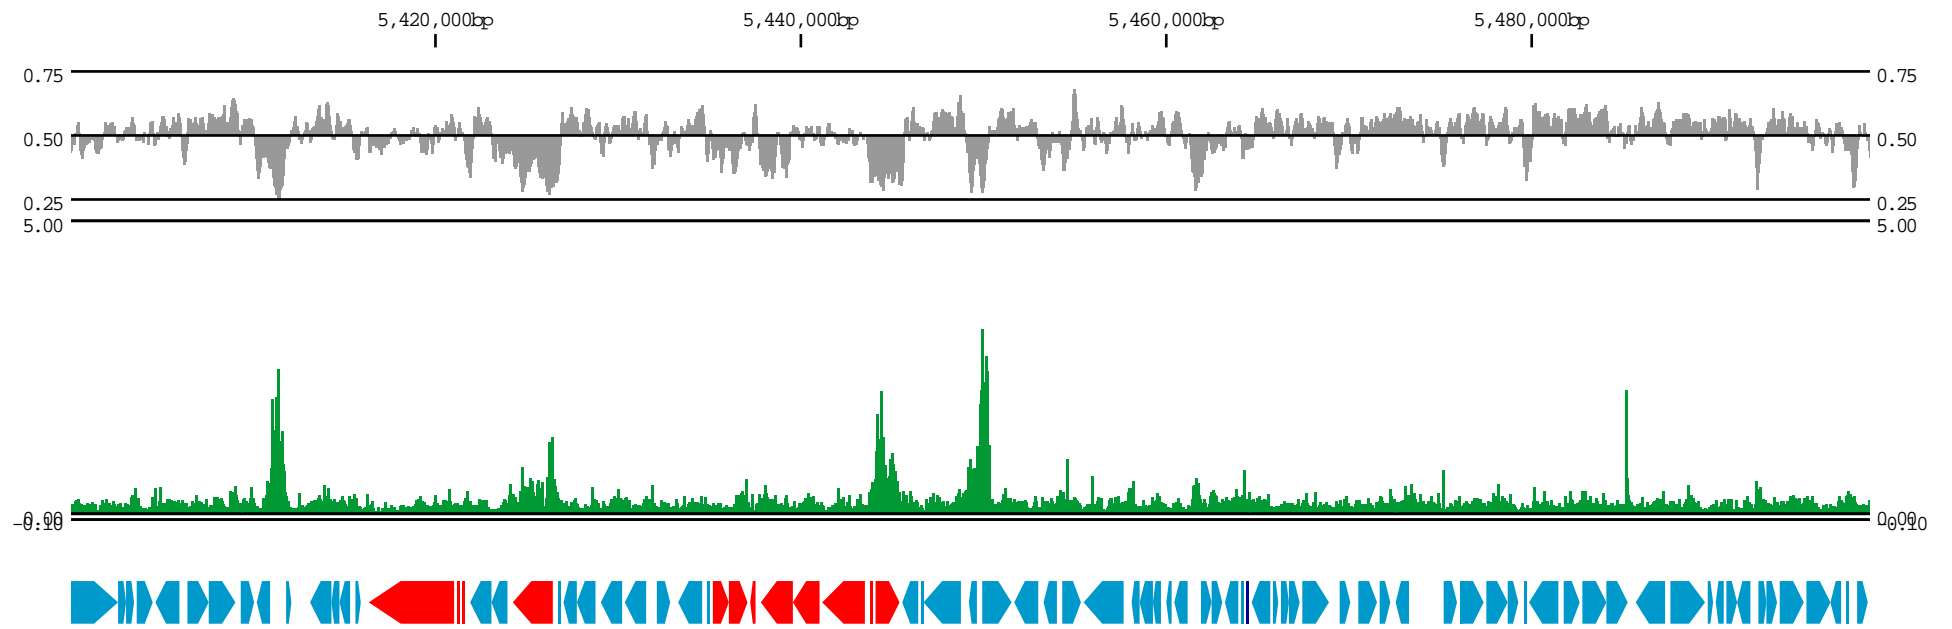

Supplement: dsm033_1.pdf [file dsm033_1.pdf]
